# Supplementary material for: Transcriptomic and Metabolomic Analyses of the Effects of Exogenous Trehalose on Heat Tolerance in Wheat
Source: Int J Mol Sci. 2022 May 6;23(9):5194. doi: 10.3390/ijms23095194 (PMC9103215; doi:10.3390/ijms23095194)
Supplement: Supplementary file 1 [file ijms-23-05194-s001.zip]

Archive with 8 entries (8 files):
- Figure S1 Qualitative analysis of metabolites.pdf
- Figure S2 Gene-metabolite integrated analysis pathway diagram of TCA cycle.pdf
- Figure S3 Gene-metabolite integrated analysis pathway diagram of purine metabolism.pdf
- Figure S4 Gene-metabolite integrated analysis pathway diagram of phenylpropanoid biosynthesis.pdf
- Figure S5 KEGG metabolic pathway enrichment of DEGs and differential metabolites of two kinds of wheat without trehalose pretreatment at high temperature.pdf
- Table S1 Quantitative analysis of metabolites.xlsx
- Table S2 Primer List.pdf
- Table S3 Transcriptome sequencing quality of Triticum aestivum L.pdf
