# Supplementary material for: Transcriptomic and Metabolomic Analyses of the Effects of Exogenous Trehalose on Heat Tolerance in Wheat
Source: Int J Mol Sci. 2022 May 6;23(9):5194. doi: 10.3390/ijms23095194 (PMC9103215; doi:10.3390/ijms23095194)
Supplement: Supplementary file 1 [file ijms-23-05194-s001.zip › Figure S1 Qualitative analysis of metabolites.pdf]

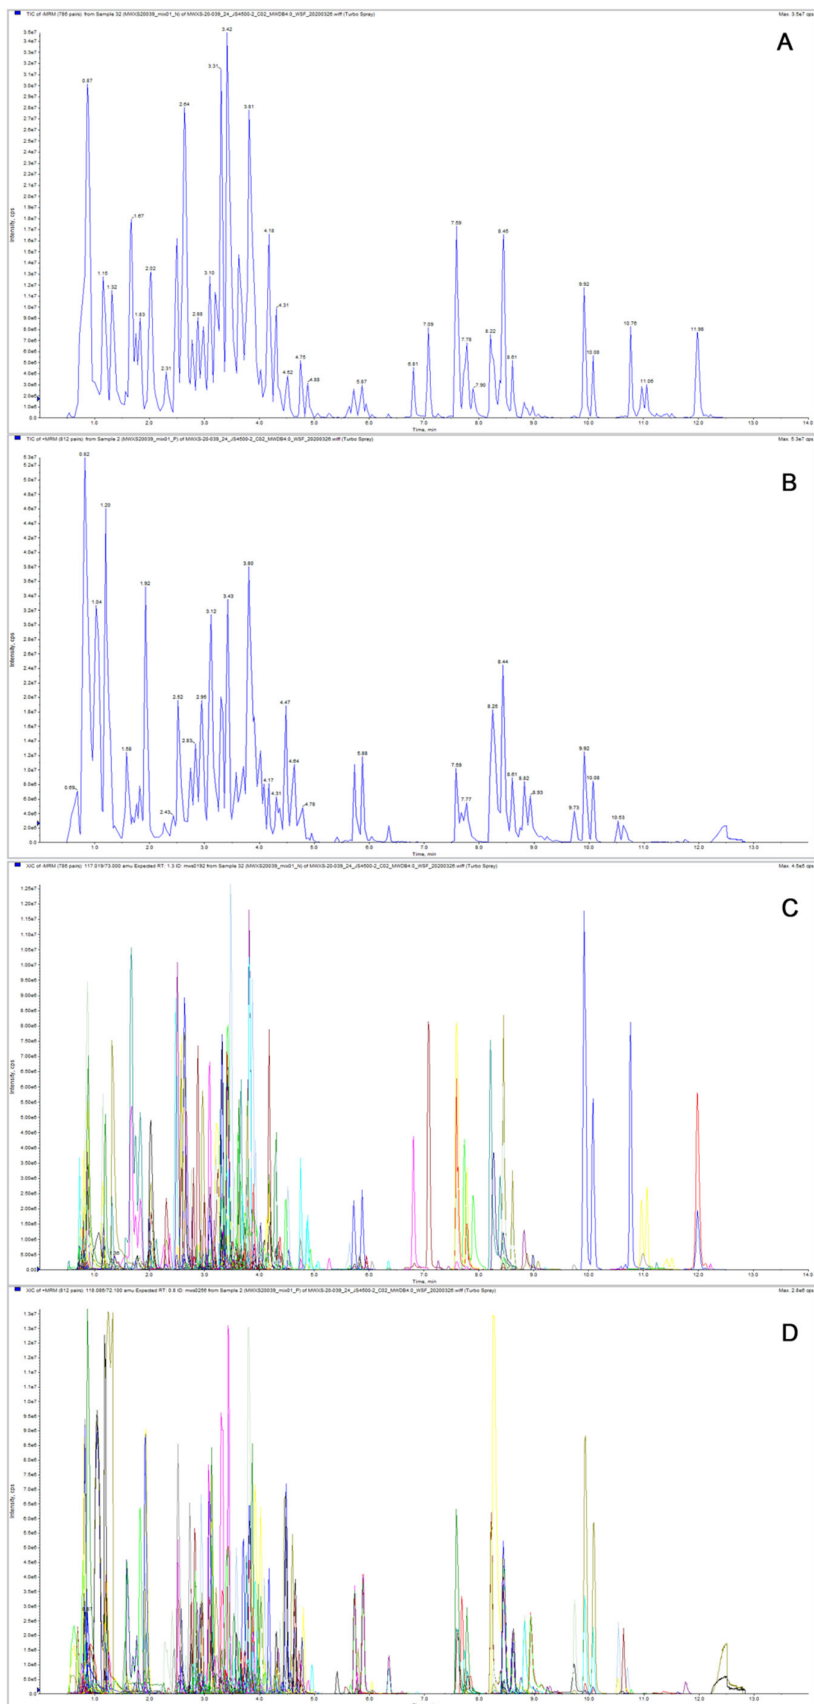

**Supplementary Figure S1. Qualitative analysis of metabolites.** (A) (B) Total ions current of mixed quality control samples. (A) Negative ion mode. (B) Positive ion mode. (C) (D) Extracted ions current of mixed quality control samples. (C) Negative ion mode. (D) Positive ion mode. Abscissa represents the retention time (Rt) of the metabolite detection, and ordinate represents the ion flow intensity of the detection (unit: count per second). The area of each chromatographic peak represents the relative content of the corresponding substance.
