# Supplementary material for: Transcriptomic and Metabolomic Analyses of the Effects of Exogenous Trehalose on Heat Tolerance in Wheat
Source: Int J Mol Sci. 2022 May 6;23(9):5194. doi: 10.3390/ijms23095194 (PMC9103215; doi:10.3390/ijms23095194)
Supplement: Supplementary file 1 [file ijms-23-05194-s001.zip › Table S1 Quantitative analysis of metabolites.xlsx]

## Sheet: Sheet1
Index	Q1 (Da)	Q3 (Da)	Molecular Weight (Da)	Formula	Ionization model	Compounds	Class I	Class II	CAS	Level	M_l_CK1	M_l_CK2	M_l_CK3	M_l_H1	M_l_H2	M_l_H3	M_l_Tre1	M_l_Tre2	M_l_Tre3	M_l_TreH1	M_l_TreH2	M_l_TreH3	M_ll_CK1	M_ll_CK2	M_ll_CK3	M_ll_H1	M_ll_H2	M_ll_H3	M_ll_Tre1	M_ll_Tre2	M_ll_Tre3	M_ll_TreH1	M_ll_TreH2	M_ll_TreH3	mix01	mix02	mix03	cpd_ID	kegg_map
pmb0782	86.1	69.2	85.1	C5H11N	[M+H]+	Piperidine	Alkaloids	Alkaloids	110-89-4	B	1400000	1640000	1520000	13600000	10500000	10000000	1800000	2090000	2060000	10000000	10600000	10300000	758000	1200000	1430000	8360000	9210000	8610000	2090000	1390000	1610000	9140000	11200000	8930000	8130000	7340000	6810000	C01746	ko00960
pme2292	89.11	72.08	88.1	C4H12N2	[M+H]+	Putrescine	Alkaloids	Phenolamine	110-60-1	B	1690000	810000	1480000	246000	1190000	266000	3440000	5020000	1510000	1700000	2130000	1150000	736000	608000	289000	359000	287000	577000	1080000	864000	562000	1710000	638000	619000	833000	1260000	1240000	C00134	ko00330,ko00472,ko00480,ko00960,ko01100,ko01110,ko02010
pme2601	89	59	90.032	C3H6O3	[M-H]-	3-Hydroxypropanoic acid	Organic acids	Organic acids	503-66-2	B	11500	9070	6410	9940	11500	5990	9330	12500	4520	5610	5630	6260	12400	7910	5390	7510	4200	3730	13100	13700	7950	9110	5170	5110	8860	8150	8070	C01013	ko00240,ko00410,ko00640,ko01100,ko01200
pme3017	104.07	58	103.063	C4H9NO2	[M+H]+	2-Aminoisobutyric acid	Amino acids and derivatives	Amino acids and derivatives	62-57-7	B	3570000	1510000	1580000	1960000	2900000	2480000	1500000	1220000	1660000	1860000	2250000	2350000	3740000	2460000	3390000	3750000	3250000	3500000	1920000	2510000	1650000	2160000	2000000	2590000	2380000	2650000	2610000	C03665	--
pme3033	104.07	86	103.063	C4H9NO2	[M+H]+	N,N-Dimethylglycine	Amino acids and derivatives	Amino acids and derivatives	1118-68-9	B	905000	368000	455000	1360000	1990000	1450000	623000	513000	708000	2240000	2320000	3470000	1440000	675000	3770000	1660000	1280000	1400000	329000	441000	314000	505000	739000	885000	1550000	1440000	1250000	C01026	ko00260,ko01100
pme3011	104.07	68.8	103.063	C4H9NO2	[M+H]+	γ-Aminobutyric acid	Organic acids	Organic acids	1956/12/2	B	982000	330000	537000	1930000	2620000	2170000	801000	645000	889000	3160000	3560000	4890000	1690000	705000	5190000	2170000	1660000	1570000	287000	455000	299000	510000	895000	1040000	1940000	1850000	1640000	C00334	ko00250,ko00330,ko00410,ko00650,ko00760,ko01100
mws0576	103.04	59.1	104.047	C4H8O3	[M-H]-	3-Hydroxybutyrate	Organic acids	Organic acids	300-85-6	B	846000	807000	734000	1020000	1120000	900000	784000	971000	803000	654000	652000	714000	773000	902000	850000	572000	538000	535000	758000	878000	687000	610000	644000	593000	867000	731000	798000	--	--
mws0890	104.04	74.02	105.043	C3H7NO3	[M-H]-	D-Serine	Amino acids and derivatives	Amino acids and derivatives	312-84-5	B	73500	51300	55800	32900	19700	28600	55600	61400	55400	39400	40000	30100	37900	50600	55300	35800	29100	41100	64100	61300	47600	61700	54300	49300	55700	43100	42800	--	--
mws0255	112.05	95	111.043	C4H5N3O	[M+H]+	Cytosine	Nucleotides and derivatives	Nucleotides and derivatives	71-30-7	B	826000	181000	171000	294000	460000	265000	763000	342000	214000	266000	386000	315000	588000	259000	1160000	289000	272000	221000	153000	252000	198000	131000	176000	153000	374000	382000	367000	C00380	ko00240,ko01100
pme0257	111.02	80	112.027	C4H4N2O2	[M-H]-	Uracil	Nucleotides and derivatives	Nucleotides and derivatives	66-22-8	B	301000	285000	330000	224000	146000	142000	297000	236000	310000	132000	150000	144000	142000	161000	105000	87200	117000	136000	214000	191000	194000	136000	144000	158000	195000	155000	185000	C00106	ko00240,ko00410,ko00770,ko01100
pmf0585	116.07	70	115.063	C5H9NO2	[M+H]+	DL-Proline	Amino acids and derivatives	Amino acids and derivatives	609-36-9	B	4600000	5780000	5600000	20900000	23000000	19400000	6090000	6350000	6490000	32500000	34300000	36500000	2920000	4240000	6620000	22000000	24200000	22100000	4050000	4540000	6570000	12900000	15500000	13800000	21500000	18200000	17100000	C16435	--
pme0006	116.07	70.1	115.063	C5H9NO2	[M+H]+	L-Proline	Amino acids and derivatives	Amino acids and derivatives	147-85-3	B	4980000	5880000	5800000	21600000	23600000	20500000	6430000	6580000	6900000	33900000	35200000	38200000	3060000	4560000	6920000	23600000	26000000	22800000	4150000	4780000	7050000	14100000	16300000	13900000	22100000	19000000	17700000	C00148	ko00330,ko00332,ko00970,ko01100,ko01110,ko01230,ko02010
mws0376	115	71	116.011	C4H4O4	[M-H]-	Fumaric acid	Organic acids	Organic acids	110-17-8	B	105000	58700	88400	400000	530000	245000	145000	91500	44200	185000	243000	67000	90400	113000	284000	59200	255000	242000	61300	53700	86000	161000	69800	167000	210000	214000	162000	C00122	ko00020,ko00190,ko00220,ko00250,ko00350,ko00360,ko00620,ko00650,ko00760,ko01100,ko01110,ko01200
mws0823	115.04	71	116.047	C5H8O3	[M-H]-	3-Methyl-2-Oxobutanoic acid	Organic acids	Organic acids	759-05-7	B	62200	56100	78400	83000	37900	44300	44900	47100	72700	23900	25500	31900	42000	47600	60700	31300	28700	26700	47900	54800	55800	31700	39600	31000	62300	49800	54300	C00141	ko00280,ko00290,ko00770,ko00966,ko01100,ko01110,ko01210,ko01230
pmb1096	118.07	91	117.058	C8H7N	[M+H]+	Indole	Alkaloids	Plumerane	120-72-9	B	91000	85200	148000	449000	371000	412000	165000	122000	130000	408000	453000	446000	66000	67500	44700	339000	387000	363000	143000	64200	78000	443000	396000	373000	377000	332000	322000	C00463	ko00380,ko00400,ko00402,ko01100,ko01110
mws0256	118.09	72.1	117.079	C5H11NO2	[M+H]+	L-Valine	Amino acids and derivatives	Amino acids and derivatives	72-18-4	A	1960000	2310000	2240000	14600000	11600000	11100000	2590000	2450000	2470000	12100000	13200000	12500000	1370000	1930000	2340000	9580000	10500000	10000000	3110000	2240000	2410000	12500000	12400000	10600000	8540000	8070000	8350000	C00183	ko00280,ko00290,ko00311,ko00460,ko00770,ko00966,ko00970,ko01100,ko01110,ko01210,ko01230,ko02010
mws0191	118.09	59	117.079	C5H11NO2	[M+H]+	Betaine	Alkaloids	Alkaloids	107-43-7	A	20200000	17600000	14300000	21700000	25800000	21700000	15700000	20000000	15200000	23700000	24300000	23500000	19300000	19700000	25000000	26100000	26800000	25300000	20400000	24100000	22400000	23000000	26500000	25900000	27600000	22000000	22800000	C00719	ko00260,ko01100,ko02010
pme0120	118.09	101	117.079	C5H11NO2	[M+H]+	5-Aminovaleric acid	Amino acids and derivatives	Amino acids and derivatives	660-88-8	B	48400	29100	20200	150000	131000	125000	31300	43100	30600	113000	113000	77000	26500	25300	79000	82900	88800	68900	17800	27600	28000	132000	93700	78800	72000	81000	82500	C00431	ko00310,ko00330,ko01100
mws0470	117.02	73	118.027	C4H6O4	[M-H]-	Methylmalonic acid	Organic acids	Organic acids	516-05-2	A	2310000	1840000	1590000	3390000	4780000	5090000	1420000	1770000	1590000	2390000	2880000	1810000	1200000	1240000	1390000	2790000	3030000	2230000	1280000	1440000	1640000	1280000	2320000	2050000	2540000	2550000	2530000	C02170	ko00240,ko00280,ko00640,ko01100
mws0192	117.02	73	118.027	C4H6O4	[M-H]-	Succinic acid	Organic acids	Organic acids	110-15-6	A	2280000	1760000	1590000	3200000	4440000	4800000	1340000	1670000	1480000	2390000	2200000	1970000	1080000	1250000	1070000	2680000	3120000	2160000	1220000	1260000	1490000	1220000	2080000	1580000	2260000	2280000	2250000	C00042	ko00020,ko00190,ko00250,ko00310,ko00350,ko00360,ko00620,ko00630,ko00640,ko00650,ko00760,ko00920,ko01100,ko01110,ko01200
mws0147	117.06	59	118.063	C5H10O3	[M-H]-	3-Hydroxy-3-methyl butyric acid	Organic acids	Organic acids	625-08-1	B	82900	67400	76900	1840000	1380000	1270000	79700	88200	73200	574000	638000	553000	57100	84000	111000	784000	800000	580000	91200	102000	76000	762000	916000	896000	549000	552000	571000	--	--
pme3096	118	74	119.022	C3H5NO4	[M-H]-	Aminomalonic acid	Organic acids	Organic acids	1068-84-4	B	1900000	1480000	1290000	2490000	3460000	3710000	1070000	1290000	1220000	1690000	1820000	1540000	900000	1060000	934000	2060000	2260000	1780000	979000	1060000	1320000	1240000	1590000	1430000	2240000	1750000	1890000	C00872	--
mws0230	120.07	74	119.058	C4H9NO3	[M+H]+	L-(-)-Threonine	Amino acids and derivatives	Amino acids and derivatives	72-19-5	B	476000	485000	442000	1930000	1920000	1680000	489000	495000	467000	1950000	1660000	1880000	416000	345000	410000	1690000	1840000	1790000	520000	396000	461000	1630000	1720000	1480000	1650000	1150000	1220000	C00188	ko00260,ko00261,ko00290,ko00860,ko00970,ko01100,ko01110,ko01230,ko02010
mws0671	120.07	74.1	119.058	C4H9NO3	[M+H]+	L-Homoserine	Organic acids	Organic acids	672-15-1	B	559000	556000	521000	2080000	1970000	1900000	531000	518000	553000	1870000	1970000	2010000	408000	371000	459000	1790000	1870000	1760000	530000	423000	474000	1660000	2060000	1700000	1670000	1280000	1170000	C00263	ko00260,ko00270,ko00300,ko00920,ko01100,ko01110,ko01230
pmp001287	120.08	103.05	119.073	C8H9N	[M+H]+	N-Benzylmethylene isomethylamine	Alkaloids	Alkaloids	-	A	6700000	6820000	6660000	47000000	37300000	36700000	8130000	8000000	7710000	38800000	41000000	38100000	4880000	5610000	9050000	34400000	35400000	33400000	8820000	6930000	7160000	40600000	40900000	37800000	30500000	29000000	26800000	--	--
pmb0069	122	105	121	C7H7NO	[M+H]+	Benzamide	Others	Others	55-21-0	B	364000	265000	269000	143000	172000	71900	363000	274000	327000	127000	161000	91700	224000	272000	207000	72800	120000	88800	330000	297000	346000	96900	54900	76000	239000	209000	207000	C09815	--
pme0195	120.02	62	121.02	C3H7NO2S	[M-H]-	L-Cysteine	Amino acids and derivatives	Amino acids and derivatives	52-90-4	B	36100	45600	21800	805000	554000	407000	75500	27200	38300	234000	75400	364000	9	9	12000	267000	194000	143000	39700	11100	11500	148000	297000	269000	124000	132000	117000	C00097	ko00260,ko00270,ko00311,ko00332,ko00430,ko00460,ko00480,ko00730,ko00770,ko00920,ko00970,ko01100,ko01110,ko01200,ko01230,ko04122
mws0491	122.1	105	121.089	C8H11N	[M+H]+	Phenethylamine	Others	Others	64-04-0	B	1350000	904000	1100000	513000	615000	272000	1380000	1050000	1080000	461000	557000	341000	926000	997000	803000	239000	397000	321000	1090000	1060000	1210000	338000	200000	259000	818000	748000	741000	C05332	ko00360,ko01100
mws0628	121.03	92	122.037	C7H6O2	[M-H]-	4-Hydroxybenzaldehyde	Phenolic acids	Phenolic acids	123-08-0	B	92000	99900	80500	182000	149000	174000	109000	125000	97400	124000	80400	123000	80700	102000	184000	118000	131000	120000	120000	98400	107000	109000	142000	136000	177000	128000	126000	C00633	ko01100
mws0133	123.06	79.9	122.048	C6H6N2O	[M+H]+	Nicotinamide	Others	Vitamin	98-92-0	B	1280000	875000	1090000	1660000	873000	805000	927000	975000	840000	868000	861000	690000	1500000	1080000	4360000	936000	1190000	1160000	1040000	1090000	1040000	660000	691000	899000	1300000	1210000	1060000	C00153	ko00760,ko01100
pme1216	122.03	78	123.032	C6H5NO2	[M-H]-	2-Picolinic acid	Organic acids	Organic acids	98-98-6	B	63000	76800	99000	226000	178000	156000	82600	89400	77800	168000	182000	239000	96900	152000	252000	276000	206000	207000	125000	148000	108000	131000	118000	155000	183000	156000	160000	C10164	ko00380,ko01100
mws0251	127.05	110	126.043	C5H6N2O2	[M+H]+	Thymine	Nucleotides and derivatives	Nucleotides and derivatives	65-71-4	B	18700	17200	29200	377000	100000	57300	35500	21800	15600	19800	34300	26000	18600	53800	104000	23600	65300	46600	21800	7310	20700	20200	25400	46800	62900	56700	42400	C00178	ko00240,ko01100
mws0813	128.04	82	129.043	C5H7NO3	[M-H]-	5-Oxoproline	Amino acids and derivatives	Amino acids and derivatives	149-87-1	B	9	3180	6820	14700	14800	9540	5900	4970	5330	18100	30400	17900	3520	5470	6830	13900	15300	17200	5560	7450	4260	10100	9870	13200	11700	9950	11800	C01879	ko00480,ko01100
mws0263	128.04	82.03	129.043	C5H7NO3	[M-H]-	L-PyroglutamicAcid	Amino acids and derivatives	Amino acids and derivatives	98-79-3	B	9	4160	9	20000	26000	11000	5610	5530	8730	24900	33100	29200	3490	4690	2020	13500	16600	15700	5730	11300	8630	22100	17700	31500	17000	16200	15500	--	--
Rfmb319	130.09	84.08	129.079	C6H11NO2	[M+H]+	Pipecolic acid	Amino acids and derivatives	Amino acids and derivatives	4043-87-2	B	1260000	1170000	1360000	1840000	2770000	1880000	827000	1200000	984000	1940000	2090000	2020000	2890000	2720000	3210000	4110000	4110000	3490000	4040000	4770000	2920000	2970000	3410000	4430000	2880000	2540000	2700000	--	--
pme2693	131.12	114.09	130.111	C6H14N2O	[M+H]+	N-Acetylputrescine	Alkaloids	Phenolamine	18233-70-0	B	248000	142000	138000	177000	329000	150000	245000	330000	136000	231000	233000	204000	183000	141000	116000	297000	149000	221000	206000	211000	135000	159000	198000	164000	201000	217000	217000	C02714	ko00330,ko01100
pmb0501	131.13	114.1	130.122	C5H14N4	[M+H]+	Agmatine	Alkaloids	Phenolamine	306-60-5	B	254000	119000	133000	151000	265000	147000	223000	424000	120000	228000	233000	188000	179000	148000	107000	264000	158000	228000	166000	210000	129000	186000	151000	147000	222000	225000	200000	C00179	ko00330,ko01100
mws0712	130.05	86	131.058	C5H9NO3	[M-H]-	N-Propionylglycine	Amino acids and derivatives	Amino acids and derivatives	21709-90-0	B	2050000	1940000	1950000	665000	500000	829000	1510000	1740000	1700000	1060000	652000	1040000	1130000	1940000	1150000	780000	765000	955000	1750000	1780000	873000	1170000	692000	1240000	1050000	936000	993000	--	--
mws0227	132.1	86.2	131.095	C6H13NO2	[M+H]+	L-Leucine	Amino acids and derivatives	Amino acids and derivatives	61-90-5	A	345000	398000	412000	3690000	2990000	2780000	542000	568000	557000	2830000	3120000	2930000	217000	311000	474000	2300000	2410000	2500000	611000	382000	437000	2820000	3120000	2760000	2210000	2090000	2090000	C00123	ko00280,ko00290,ko00966,ko00970,ko01100,ko01110,ko01210,ko01230,ko02010
mws0258	132.1	86	131.095	C6H13NO2	[M+H]+	L-Isoleucine	Amino acids and derivatives	Amino acids and derivatives	73-32-5	A	405000	467000	485000	4160000	3190000	3070000	585000	579000	652000	3030000	3120000	3060000	263000	359000	502000	2560000	2910000	2700000	673000	455000	470000	3180000	3430000	3100000	2230000	2190000	2220000	C00407	ko00280,ko00290,ko00460,ko00960,ko00966,ko00970,ko01100,ko01110,ko01210,ko01230,ko02010
pmp001198	132.1	57.1	131.095	C6H13NO2	[M+H]+	6-Deoxyfagomine	Alkaloids	Alkaloids	197449-09-5	A	1820000	2110000	2080000	18600000	15100000	14000000	2520000	2870000	2700000	14200000	15500000	14800000	1130000	1520000	2170000	12600000	13000000	12200000	2900000	1890000	2220000	17100000	16200000	13900000	11200000	10800000	9890000	--	--
mws1587	132.1	86	131.095	C6H13NO2	[M+H]+	α-Aminocaproic acid	Amino acids and derivatives	Amino acids and derivatives	327-57-1	A	671000	816000	797000	6670000	5370000	5190000	1010000	1180000	1110000	5360000	5850000	5360000	439000	670000	995000	4190000	4560000	4300000	1020000	761000	865000	6690000	5460000	5020000	4000000	3700000	3570000	--	--
pme0243	131.04	87	132.042	C5H8O4	[M-H]-	Glutaric acid	Organic acids	Organic acids	110-94-1	B	162000	96400	80300	3420000	4530000	4160000	87900	178000	132000	1520000	1520000	1400000	120000	108000	155000	1080000	1430000	919000	137000	202000	130000	1350000	1880000	1710000	1390000	1070000	1190000	C00489	ko00071,ko00310,ko01100
mws0473	131.03	87	132.042	C5H8O4	[M-H]-	2-Methylsuccinic acid	Organic acids	Organic acids	498-21-5	A	200000	117000	95000	3330000	4630000	4410000	114000	191000	144000	1310000	1350000	1490000	126000	120000	157000	1230000	1190000	978000	135000	243000	127000	1390000	1910000	1400000	1330000	1220000	1460000	--	--
mws0972	131.07	85	132.079	C6H12O3	[M-H]-	5-Hydroxyhexanoic acid	Organic acids	Organic acids	185956-02-9	B	39000	16500	24300	36100	33400	27900	31400	35800	28000	26000	17800	26400	18000	15200	55400	10700	18500	15600	26800	25100	18100	18400	14900	13600	35400	25500	20000	--	--
pme2527	133	116	132.09	C5H12N2O2	[M+H]+	L-Ornithine	Amino acids and derivatives	Amino acids and derivatives	70-26-8	B	6700	4760	9450	34800	29600	34700	9460	8000	11800	22100	25800	21100	9740	10400	18100	15100	14000	11700	10800	19300	11300	18300	19300	23900	17200	17400	14300	C00077	ko00220,ko00330,ko00472,ko00480,ko01100,ko01110,ko01210,ko01230,ko02010
mws0219	132.03	88	133.038	C4H7NO4	[M-H]-	L-AsparticAcid	Amino acids and derivatives	Amino acids and derivatives	56-84-8	A	3420000	3160000	3630000	6780000	8550000	8640000	2380000	2870000	2650000	6410000	7260000	4900000	3690000	4320000	4460000	10100000	10100000	10500000	3720000	4160000	4160000	8550000	8360000	11500000	7430000	7200000	7170000	C00049	ko00220,ko00250,ko00260,ko00261,ko00270,ko00300,ko00340,ko00410,ko00460,ko00710,ko00760,ko00770,ko00970,ko01100,ko01110,ko01200,ko01210,ko01230,ko02010
mws0275	133.01	71	134.022	C4H6O5	[M-H]-	L-(-)-Malic acid	Organic acids	Organic acids	636-61-3	A	35600000	31000000	27300000	22100000	29800000	29500000	34300000	30300000	30200000	32800000	36500000	29900000	32400000	23500000	30700000	26400000	30700000	31200000	19200000	25100000	18000000	43600000	33000000	22400000	33000000	27200000	28400000	C00497	ko00650,ko01100
pme0040	136.06	119	135.054	C5H5N5	[M+H]+	Adenine	Nucleotides and derivatives	Nucleotides and derivatives	73-24-5	A	31600000	3230000	3750000	8920000	18100000	19800000	3710000	4050000	3890000	6140000	6760000	11000000	34900000	13200000	51900000	18400000	15600000	13500000	6680000	13700000	9640000	4910000	7390000	8860000	15200000	14100000	14600000	C00147	ko00230,ko00908,ko01100
mws0889	135.03	75.01	136.037	C4H8O5	[M-H]-	Threonate	Others	Saccharides and Alcohols	70753-61-6	A	391000	433000	625000	366000	366000	415000	350000	495000	406000	413000	617000	404000	376000	516000	189000	567000	618000	577000	433000	520000	564000	1150000	438000	598000	660000	571000	599000	--	--
Hmbn002174	135.05	120.02	136.053	C8H8O2	[M-H]-	4-Hydroxyacetophenone	Phenolic acids	Phenolic acids	99-93-4	A	84200	21600	34100	50500	87800	49600	40800	32000	39200	48200	57400	101000	282000	138000	687000	206000	119000	129000	85800	113000	53200	33700	48200	58600	125000	130000	107000	--	--
mws1336	138.05	120	137.048	C7H7NO2	[M+H]+	4-Aminobenzoic acid	Phenolic acids	Phenolic acids	150-13-0	B	7430	6450	5690	15100	16700	7660	9750	11100	3940	5970	5920	2660	6540	6950	18100	11800	12200	12500	6430	12400	8470	7800	4920	4840	5300	7390	9080	--	--
pme1002	138.09	103	137.084	C8H11NO	[M+H]+	L-Tyramine	Amino acids and derivatives	Amino acids and derivatives	51-67-2	A	873000	368000	855000	385000	505000	474000	816000	858000	667000	249000	264000	256000	164000	333000	326000	232000	205000	257000	263000	452000	287000	211000	164000	200000	419000	368000	372000	C00483	ko00350,ko00950,ko01100,ko01110
mws0749	137.02	93	138.032	C7H6O3	[M-H]-	4-Hydroxybenzoic acid	Phenolic acids	Phenolic acids	99-96-7	B	200000	74200	127000	278000	450000	301000	133000	144000	150000	154000	142000	159000	143000	188000	541000	166000	141000	162000	158000	203000	141000	117000	107000	102000	191000	208000	213000	C00156	ko00130,ko00790,ko01100,ko01110
mws0336	137.04	93.05	138.043	C6H6N2O2	[M-H]-	UROCANIC ACID(RG)	Organic acids	Organic acids	104-98-3	B	40700	25600	34900	9	9	10800	24800	26600	20200	12500	16000	10000	48600	35700	51400	11000	18700	12900	36100	30900	34800	17100	10300	8810	27400	19000	25900	--	--
mws2368	137.06	119.05	138.068	C8H10O2	[M-H]-	Tyrosol	Phenolic acids	Phenolic acids	501-94-0	B	9	9	9	21000	21500	25500	9	9	9	9	9	9	9	9	9	31600	58100	33100	9	9	9	22600	38400	57800	21800	20900	16300	--	--
mws0704	140.01	78.96	141.019	C2H8NO4P	[M-H]-	O-Phosphorylethanolamine	Others	Others	1071-23-4	B	10300	6510	8360	2580	7130	8660	7970	12700	9960	4760	2760	3410	9590	8930	8690	5080	3670	4180	8700	7840	5810	8070	4420	5210	8730	8330	6180	C00346	ko00564,ko00600,ko01100
pma2987	142.1	124.09	141.09	C6H11N3O	[M+H]+	Histidinol	Others	Others	501-28-0	B	14500000	16000000	12800000	15900000	17600000	16600000	16000000	14600000	15100000	18000000	16000000	18300000	11700000	14000000	10800000	15300000	16800000	16300000	13200000	14300000	13100000	16800000	17100000	15200000	17200000	17900000	16900000	C00860	ko00340,ko01100,ko01110,ko01230
pme3207	141.02	59	142.027	C6H6O4	[M-H]-	Trans,trans-Muconic acid	Organic acids	Organic acids	3588-17-8	B	2550000	2240000	2900000	518000	1220000	1220000	2170000	2400000	2940000	805000	1050000	952000	6670000	4570000	4600000	1910000	1800000	1890000	2770000	3950000	3080000	1640000	1550000	1870000	2170000	1790000	1750000	--	--
pmb0764	144.05	113.2	143.04	C6H9NOS	[M+H]+	4-Methyl-5-thiazoleethanol	Others	Others	137-00-8	A	38500	28100	31800	67000	74300	49000	63600	37700	40300	49500	52400	26400	22300	32400	83600	25100	49800	60500	24000	16600	26700	41900	19300	42900	44500	48400	48100	C04294	ko00730,ko01100
Rfmb318	144.1	84.08	144.092	C7H14NO2+	[M]+	Proline betaine(ProBet)	Amino acids and derivatives	Amino acids and derivatives	1195-94-4	B	9	105000	44500	83300	70900	77400	41300	80300	82600	56100	75200	101000	295000	375000	567000	564000	426000	561000	518000	509000	454000	440000	536000	501000	309000	230000	257000	--	--
mws0103	146.06	91	145.053	C9H7NO	[M+H]+	Indole-3-carboxaldehyde	Alkaloids	Plumerane	487-89-8	B	40600	63600	59600	126000	91700	94200	62300	76300	50200	86300	60400	73200	31200	50800	64600	61800	65200	73300	58900	52400	54500	51500	62800	63600	68800	70900	69800	C08493	--
pme0295	146.08	86	145.074	C6H11NO3	[M+H]+	4-Acetamidobutyric acid	Organic acids	Organic acids	3025-96-5	B	180000	128000	139000	349000	257000	231000	126000	201000	211000	284000	257000	227000	65500	84700	227000	283000	246000	258000	98300	66200	89900	236000	244000	247000	246000	232000	198000	C02946	ko00330,ko01100
mws0567	146.09	87	145.085	C5H11N3O2	[M+H]+	4-Guanidinobutyric acid	Organic acids	Organic acids	463-00-3	B	2840000	2400000	1830000	2880000	4010000	2870000	2560000	2570000	2440000	2330000	2950000	1960000	1990000	1970000	1890000	2860000	2350000	2760000	1980000	2380000	2440000	2130000	2430000	2420000	2770000	2550000	2500000	C01035	ko00330,ko01100
pme2380	145	101	146.022	C5H6O5	[M-H]-	A-Ketoglutaric acid	Organic acids	Organic acids	328-50-7	B	312000	238000	177000	447000	550000	403000	220000	214000	214000	263000	231000	251000	299000	216000	245000	158000	146000	143000	132000	235000	194000	86900	101000	117000	302000	220000	232000	--	--
mws0924	145.05	101	146.058	C6H10O4	[M-H]-	2-Methylglutaric acid	Organic acids	Organic acids	617-62-9	B	168000	218000	282000	644000	582000	393000	224000	197000	143000	376000	395000	328000	110000	114000	101000	218000	326000	245000	126000	179000	105000	208000	253000	292000	321000	293000	296000	--	--
pme0193	147.08	84	146.069	C5H10N2O3	[M+H]+	L-Glutamine	Amino acids and derivatives	Amino acids and derivatives	56-85-9	B	1460000	2100000	2510000	5140000	6340000	5540000	2460000	2320000	2400000	8090000	11300000	10000000	2030000	2320000	6340000	6590000	7580000	6680000	4450000	2920000	2540000	10500000	7140000	8660000	5780000	6130000	6700000	C00064	ko00220,ko00230,ko00240,ko00250,ko00630,ko00750,ko00910,ko00970,ko01100,ko01230,ko02010
pme0026	147.11	84	146.106	C6H14N2O2	[M+H]+	L-(+)-Lysine	Amino acids and derivatives	Amino acids and derivatives	56-87-1	B	1540000	2180000	2380000	5320000	6560000	5520000	2410000	2160000	2610000	7800000	11400000	10500000	1960000	2480000	6070000	6720000	7490000	6720000	4410000	2760000	2590000	10600000	7220000	8280000	5720000	5900000	6600000	C00047	ko00300,ko00310,ko00780,ko00960,ko00970,ko01100,ko01110,ko01210,ko01230,ko02010
mws1050	148.06	88	147.053	C5H9NO4	[M+H]+	O-Acetylserine	Amino acids and derivatives	Amino acids and derivatives	5147-00-2	B	799000	347000	370000	255000	166000	205000	266000	398000	278000	398000	301000	341000	236000	186000	259000	258000	188000	193000	755000	695000	521000	295000	291000	215000	391000	326000	304000	C00979	ko00270,ko00908,ko00920,ko01100,ko01110,ko01200,ko01230,ko04122
pme0014	148.06	84	147.053	C5H9NO4	[M+H]+	L-Glutamic acid	Amino acids and derivatives	Amino acids and derivatives	56-86-0	B	14800000	17100000	13700000	10300000	6210000	8340000	12800000	11900000	13600000	12600000	11200000	11400000	13300000	15700000	1910000	11200000	12300000	12700000	13200000	14700000	13200000	6170000	10000000	9800000	14700000	10600000	12700000	C00025	ko00220,ko00250,ko00330,ko00332,ko00340,ko00430,ko00480,ko00630,ko00650,ko00660,ko00860,ko00910,ko00970,ko01100,ko01110,ko01200,ko01210,ko01230,ko02010
pmb2826	147	87.1	148	C5H8O5	[M-H]-	Citramalate	Organic acids	Organic acids	2306-22-1	B	10200	11200	14500	10400	15200	14200	17800	12900	12500	9990	18900	17800	7590	12800	12800	16800	22300	27200	14500	9560	4300	24200	28200	23100	24300	13400	19000	C00815	--
pmp001285	149.02	65.04	148.016	C8H4O3	[M+H]+	Phthalic anhydride	Phenolic acids	Phenolic acids	85-44-9	A	308000	377000	480000	636000	449000	456000	427000	413000	559000	569000	604000	646000	450000	427000	251000	529000	491000	477000	359000	364000	536000	440000	470000	414000	446000	392000	355000	--	--
pme1210	150.06	61	149.051	C5H11NO2S	[M+H]+	L-Methionine	Amino acids and derivatives	Amino acids and derivatives	63-68-3	A	948000	1140000	1310000	3470000	1920000	2040000	1280000	1150000	1400000	1330000	1870000	1190000	444000	618000	2290000	1320000	1400000	1260000	1090000	621000	718000	2140000	2050000	1160000	1530000	1410000	1270000	C00073	ko00270,ko00966,ko00970,ko01100,ko01110,ko01210,ko01230
mws0847	150.08	133	149.07	C6H7N5	[M+H]+	1-Methyladenine	Nucleotides and derivatives	Nucleotides and derivatives	5142-22-3	B	41100	41500	44700	60200	36100	60000	50200	81000	68300	50100	34500	26500	38100	53800	47700	29500	25800	23400	65900	59000	45700	38600	40800	23300	82000	61200	49300	C02216	--
mws1499	149.05	59.01	150.053	C5H10O5	[M-H]-	D-(-)-Arabinose	Others	Saccharides and Alcohols	10323-20-3	B	201000	97100	116000	9	9	9	142000	144000	159000	21300	26900	9	169000	109000	280000	27700	57000	51700	156000	178000	154000	69900	28400	35900	77400	42500	61600	--	--
pme1109	152.06	135	151.049	C5H5N5O	[M+H]+	Guanine	Nucleotides and derivatives	Nucleotides and derivatives	73-40-5	A	290000	196000	288000	1370000	4440000	4390000	638000	421000	278000	275000	317000	194000	485000	411000	4450000	313000	419000	404000	209000	209000	235000	190000	115000	224000	1000000	886000	779000	C00242	ko00230,ko01100
pme0256	151.03	151	152.033	C5H4N4O2	[M-H]-	Xanthine	Nucleotides and derivatives	Nucleotides and derivatives	69-89-6	A	9	12000	14200	887000	2250000	2100000	7140	14900	13800	124000	182000	367000	9	12800	14700	96100	114000	45700	9	9	7910	168000	277000	240000	247000	232000	255000	C00385	ko00230,ko00232,ko01100,ko01110
mws0458	151.04	136	152.047	C8H8O3	[M-H]-	Vanillin	Phenolic acids	Phenolic acids	121-33-5	A	3490000	1470000	1260000	1750000	897000	956000	1750000	1730000	1470000	1160000	735000	981000	5300000	2360000	10200000	1150000	1230000	1300000	2050000	2710000	1790000	1030000	915000	917000	2520000	2020000	2130000	C00755	ko00998,ko01100,ko01110
pme0513	151.06	59	152.068	C5H12O5	[M-H]-	Xylitol	Others	Saccharides and Alcohols	87-99-0	B	58100	62900	80900	14300	21100	16800	69400	50100	52200	22500	28100	11500	41300	50900	53800	26700	44300	31100	54600	49700	44700	46000	25400	28700	36800	28100	28400	C00379	ko00040,ko01100,ko02010
mws0213	151.06	71	152.068	C5H12O5	[M-H]-	Ribitol	Others	Saccharides and Alcohols	488-81-3	B	109000	116000	152000	13800	16600	16400	133000	87000	93100	23600	40100	26200	69500	92000	68300	38800	35900	51100	132000	95700	90400	78200	41600	43300	61600	44300	41000	--	--
mws0639	153.02	109	154.027	C7H6O4	[M-H]-	2,3-Dihydroxybenzoic Acid	Organic acids	Organic acids	303-38-8	B	176000	147000	202000	97400	342000	132000	171000	158000	136000	106000	155000	307000	121000	225000	371000	155000	152000	82600	164000	177000	228000	48900	87400	99400	210000	196000	161000	C00196	ko01110
mws0183	153.02	109	154.027	C7H6O4	[M-H]-	Protocatechuic acid	Phenolic acids	Phenolic acids	99-50-3	A	162000	114000	199000	128000	313000	128000	143000	117000	107000	106000	142000	269000	111000	219000	341000	109000	130000	63000	146000	166000	173000	51900	40600	115000	154000	158000	159000	C00230	ko01100,ko01110
pmn001575	153.02	109	154.027	C7H6O4	[M-H]-	Gentisic acid	Phenolic acids	Phenolic acids	490-79-9	A	159000	130000	152000	108000	311000	94300	150000	149000	121000	92200	161000	241000	131000	186000	351000	128000	115000	47600	141000	174000	189000	74300	70100	106000	168000	147000	168000	C00628	ko00350,ko01100
mws0885	153.02	109	154.027	C7H6O4	[M-H]-	2,4-Dihydroxy benzoic acid	Phenolic acids	Phenolic acids	89-86-1	B	163000	127000	163000	102000	341000	111000	199000	145000	132000	143000	170000	285000	144000	228000	334000	131000	157000	61200	158000	178000	209000	109000	30400	118000	145000	159000	228000	--	--
pmb3099	153.03	125	154.039	C4H11O4P	[M-H]-	Diethyl phosphate	Organic acids	Organic acids	598-02-7	B	63200	106000	122000	129000	85600	81000	73700	78300	96600	94000	501	59200	68900	110000	47500	84500	83300	111000	74000	75900	106000	73600	79400	76300	76200	76900	79800	C06608	--
pmb0819	157	130	156.069	C10H8N2	[M+H]+	3-Indoleacetonitrile	Alkaloids	Plumerane	771-51-7	B	9	9	9	175000	140000	169000	9	9	14800	191000	204000	205000	9	9	9	97500	156000	141000	9	9	9	174000	171000	165000	91400	80600	99100	C02938	ko00380,ko01100
mws0005	161.11	144	160.1	C10H12N2	[M+H]+	Tryptamine	Alkaloids	Plumerane	61-54-1	A	1150000	870000	1020000	1680000	3920000	2010000	5470000	639000	571000	1010000	621000	1150000	172000	1320000	772000	676000	850000	655000	373000	240000	619000	1460000	2200000	1620000	1430000	1400000	1330000	C00398	ko00380,ko00901,ko01100,ko01110
mws1417	160.04	116	161.048	C9H7NO2	[M-H]-	Indole-3-carboxylic acid	Alkaloids	Plumerane	771-50-6	B	47300	57800	51500	95100	86100	82700	78500	66100	45500	71500	64900	60400	39800	49300	142000	50400	55800	42900	60700	50400	52200	39400	57600	48100	78900	55200	72600	--	--
pme3382	160.06	98	161.069	C6H11NO4	[M-H]-	N-Acetylthreonine	Amino acids and derivatives	Amino acids and derivatives	17093-74-2	B	53500	74600	71700	180000	201000	119000	71700	63500	69100	183000	201000	198000	61300	51400	68800	133000	168000	140000	81600	77100	63100	179000	161000	205000	135000	129000	137000	--	--
pmf0440	163.08	91.1	162.068	C10H10O2	[M+H]+	4-MethoxycinnaMaldehyde	Phenolic acids	Phenolic acids	1963-36-6	B	34600	38600	39600	50100	30300	37900	36800	37000	41700	32000	28700	29900	31700	42000	26400	36400	36000	34900	30700	43400	35800	28100	31400	27300	30700	30000	28500	--	--
pmb0142	165.1	95.2	164.047	C9H8O3	[M+H]+	Caffeic aldehyde	Phenolic acids	Phenolic acids	141632-15-7	B	259000	253000	244000	374000	162000	190000	249000	257000	211000	186000	133000	169000	217000	196000	369000	209000	190000	227000	272000	218000	236000	189000	232000	222000	282000	267000	247000	C10945	ko00940,ko01110
pme1439	165.05	119	164.047	C9H8O3	[M+H]+	p-Coumaric acid	Phenolic acids	Phenolic acids	501-98-4	B	10800	11500	4150	21500	42700	12400	11300	10200	6700	26100	57900	78700	17900	10500	29000	23200	10800	10200	11200	9900	9570	11500	11200	6190	17100	19600	13000	C00811	ko00130,ko00350,ko00940,ko00950,ko00998,ko01100,ko01110
Hmlp002407	166.05	120.04	165.042	C8H7NO3	[M+H]+	HBOA	Alkaloids	Alkaloids	23520-34-5	A	256000	218000	173000	347000	332000	400000	284000	197000	246000	185000	210000	191000	623000	609000	410000	658000	593000	775000	625000	650000	585000	668000	686000	623000	455000	522000	475000	--	--
mws1368	166.05	95	165.043	C8H7NO3	[M+H]+	Coixol	Alkaloids	Alkaloids	532-91-2	A	2510000	103000	49400	96500	251000	282000	130000	152000	127000	105000	104000	177000	3750000	528000	8340000	192000	135000	164000	166000	443000	154000	53700	59700	41800	860000	782000	613000	--	--
pme2617	166.05	102	165.046	C5H11NO3S	[M+H]+	Methionine sulfoxide	Amino acids and derivatives	Amino acids and derivatives	62697-73-8	B	5020000	4000000	4700000	5090000	4600000	5060000	4420000	4750000	4320000	4660000	5090000	4730000	3900000	3790000	3960000	4460000	4430000	4250000	4520000	3800000	4260000	4150000	4610000	4670000	4740000	4450000	4670000	--	--
pme0021	166.09	120.08	165.07	C9H11NO2	[M+H]+	L-Phenylalanine	Amino acids and derivatives	Amino acids and derivatives	63-91-2	A	140000	151000	147000	1290000	1070000	1060000	179000	173000	166000	1090000	1190000	1070000	114000	117000	217000	953000	1010000	957000	201000	160000	153000	1140000	1120000	1060000	775000	781000	718000	C00079	ko00360,ko00400,ko00460,ko00940,ko00960,ko00966,ko00970,ko00998,ko01100,ko01110,ko01210,ko01230,ko02010
mws1712	166.09	77	165.079	C9H11NO2	[M+H]+	D-(+)-Phenylalanine	Amino acids and derivatives	Amino acids and derivatives	673-06-3	A	222000	228000	224000	2180000	1740000	1720000	277000	263000	257000	1830000	1990000	1780000	171000	181000	315000	1560000	1630000	1570000	312000	246000	254000	1930000	1990000	1790000	1260000	1200000	1230000	C02265	ko00360,ko01100
pme0282	165.02	77	166.027	C8H6O4	[M-H]-	Phthalic acid	Organic acids	Organic acids	88-99-3	A	35800	38600	32000	150000	128000	101000	28700	34900	31800	107000	142000	98000	20400	29200	44100	92100	97000	118000	27400	24300	25300	82200	96600	112000	70800	85300	76700	C01606	ko01100,ko02010
pme0281	165.02	121	166.027	C8H6O4	[M-H]-	Terephthalic acid	Phenolic acids	Phenolic acids	100-21-0	A	730000	607000	578000	1940000	1890000	1630000	590000	642000	606000	1560000	1280000	1320000	630000	788000	1070000	999000	1490000	1440000	625000	597000	562000	867000	1590000	989000	1100000	1140000	1090000	C06337	ko01100
mws0344	165.04	75	166.048	C5H10O6	[M-H]-	D-Xylonic acid	Organic acids	Organic acids	526-91-0	A	3430000	3450000	2460000	1430000	2100000	2190000	2540000	3140000	3320000	1970000	2910000	1950000	1740000	1770000	1870000	1650000	1960000	1890000	2110000	2030000	1880000	2490000	1860000	1880000	2520000	2360000	2380000	--	--
mws1382	165.06	122.04	166.063	C9H10O3	[M-H]-	Apocynin	Phenolic acids	Phenolic acids	498-02-2	B	14900	13800	8850	22600	31800	30400	10800	17300	10700	25800	23600	19900	9	4850	9	22700	17300	24300	4540	6690	2500	21300	30200	13000	17100	15600	21100	--	--
mws0467	165.06	119	166.063	C9H10O3	[M-H]-	3-(4-Hydroxyphenyl)-propionic acid	Phenolic acids	Phenolic acids	501-97-3	B	34200	21800	32100	58600	61600	59600	28900	22700	16600	42300	22100	28200	17400	13500	31400	79300	42100	43800	44900	25400	25100	36000	37400	71000	48100	29000	43600	C01744	--
mws0851	143.11	143.11	166.097	C8H15NaO2	[M-Na]-	Sodium Valproate	Organic acids	Organic acids	1069-66-5	A	39800000	28400000	19100000	22900000	21900000	19000000	32400000	38600000	28500000	20600000	15400000	23400000	9760000	10400000	14000000	12300000	8540000	9440000	16100000	14000000	11700000	10400000	10500000	7450000	22400000	20100000	20600000	--	--
pmn001681	165.09	149.06	166.099	C10H14O2	[M-H]-	1-(4-Methoxyphenyl)-1-propanol	Phenolic acids	Phenolic acids	5349-60-0	B	14100	11200	12200	18500	16700	15500	13600	15000	21200	13600	15700	18000	16500	11500	16200	13700	14700	14300	11900	13300	15900	13100	12200	15900	32100	36800	34700	--	--
pmc0274	167.1	121.1	166.1	C6H6N4S	[M+H]+	6-Methylmercaptopurine	Nucleotides and derivatives	Nucleotides and derivatives	50-66-8	B	6960000	7280000	6980000	55300000	45500000	44200000	8780000	8730000	8580000	48000000	48600000	47100000	5220000	5840000	10300000	41800000	44500000	42300000	10200000	7620000	7970000	50000000	50700000	45800000	35200000	34600000	34300000	C16614	--
Hmtp000776	168.07	105.03	167.059	C8H9NO3	[M+H]+	4,5,6-Trihydroxy-2-cyclohexen-1-ylideneacetonitrile	Alkaloids	Alkaloids	-	B	154000	142000	145000	1470000	1130000	1090000	175000	172000	160000	1240000	1250000	1170000	111000	112000	208000	1050000	1080000	1060000	205000	150000	157000	1290000	1330000	1180000	800000	812000	803000	--	--
Hmbp001276	169.05	65.03	168.042	C8H8O4	[M+H]+	Gallacetophenone	Others	Others	528-21-2	A	332000	350000	377000	508000	513000	559000	348000	310000	300000	509000	508000	500000	448000	639000	25200	656000	729000	611000	720000	675000	607000	979000	775000	941000	625000	593000	566000	--	--
mws0028	167.03	108	168.042	C8H8O4	[M-H]-	Vanillic acid	Phenolic acids	Phenolic acids	121-34-6	B	52800	13100	16200	40800	98000	76600	13100	20900	21300	23000	28200	56400	164000	64800	651000	89900	49100	62900	40400	67300	27500	21300	23200	32300	86800	70500	84700	C06672	--
pme2598	167.1	123	168.042	C8H8O4	[M-H]-	3,4-Dihydroxybenzeneacetic acid	Phenolic acids	Phenolic acids	102-32-9	B	332000	388000	269000	649000	421000	409000	294000	307000	234000	416000	378000	379000	268000	192000	230000	469000	395000	497000	344000	194000	239000	1100000	1150000	1010000	558000	482000	502000	--	--
pme1383	170.08	134.1	169.074	C8H11NO3	[M+H]+	Pyridoxine	Others	Vitamin	65-23-6	B	252000	235000	204000	292000	377000	296000	264000	248000	300000	265000	255000	491000	162000	203000	589000	368000	284000	250000	219000	231000	168000	226000	335000	374000	315000	295000	321000	C00314	ko00750,ko01100
pme0124	173.09	115.5	172.085	C7H12N2O3	[M+H]+	Glycyl-L-proline	Amino acids and derivatives	Amino acids and derivatives	704-15-4	B	14700	21800	13700	11900	12800	12100	11700	15000	13000	15600	7240	9470	11600	21500	13100	13100	9960	11800	13200	10200	10600	12700	11500	14200	19100	13700	8490	--	--
pme0253	174.11	86	173.105	C8H15NO3	[M+H]+	N-Acetyl-L-leucine	Amino acids and derivatives	Amino acids and derivatives	1188-21-2	B	19800	21700	30700	81900	84600	63000	37200	25400	30200	79100	108000	92700	21600	25600	21500	38300	74600	47600	31600	33900	24500	87000	94600	92100	53600	51900	58800	C02710	--
pme3009	175.02	99	174.016	C6H6O6	[M+H]+	Trans-Citridic acid	Organic acids	Organic acids	4023-65-8	B	523000	439000	457000	370000	266000	346000	482000	341000	463000	261000	204000	322000	400000	305000	236000	133000	228000	230000	515000	324000	365000	259000	293000	157000	434000	244000	306000	--	--
mws0154	173.05	93	174.053	C7H10O5	[M-H]-	Shikimic acid	Organic acids	Organic acids	138-59-0	B	1100000	1040000	919000	81200	140000	130000	736000	736000	554000	259000	339000	306000	1160000	1140000	1690000	285000	262000	336000	980000	1060000	1040000	443000	232000	355000	718000	637000	667000	C00493	ko00400,ko01100,ko01110,ko01230
mws0242	173.08	111	174.089	C8H14O4	[M-H]-	SubericAcid	Organic acids	Organic acids	505-48-6	B	38300	52100	51200	51700	49600	35500	50800	58500	34500	34700	44300	28400	45600	30000	45700	29200	25900	25500	34200	56900	26800	25800	18000	19300	46100	34400	51700	C08278	--
mws0260	175.12	116	174.112	C6H14N4O2	[M+H]+	L-(+)-Arginine	Amino acids and derivatives	Amino acids and derivatives	74-79-3	A	624000	917000	906000	6870000	5550000	5380000	859000	1010000	955000	7090000	8450000	8640000	422000	701000	1900000	4950000	5410000	4800000	999000	618000	737000	6720000	7630000	7250000	4210000	4190000	4180000	C00062	ko00220,ko00261,ko00330,ko00472,ko00970,ko01100,ko01110,ko01230,ko02010
mws0620	175.12	144	174.116	C11H14N2	[M+H]+	N-Methyltryptamine	Alkaloids	Alkaloids	61-49-4	B	1690000	2230000	690000	2010000	9480000	1850000	5950000	2900000	783000	6940000	98500	954000	716000	2210000	930000	1750000	2230000	775000	874000	141000	142000	646000	516000	541000	2400000	2190000	2160000	C06213	ko00380,ko01100
Hmfn00531	175.02	87.01	176.032	C6H8O6	[M-H]-	L-Ascorbic acid	Others	Vitamin	50-81-7	A	7590000	7740000	7820000	9	9	9	7940000	8370000	7160000	9	9	41200	7190000	8070000	2590000	1830000	147000	966000	10900000	9350000	2130000	1250000	143000	613000	1560000	1690000	1940000	C00072	ko00053,ko00480,ko01100,ko01110
mws4175	175.02	85.03	176.032	C6H8O6	[M-H]-	D-Glucurono-6,3-lactone	Others	Others	32449-92-6	B	951000	902000	952000	9	9	9	905000	871000	836000	9	9	9	840000	993000	289000	157000	9	70700	1720000	1220000	1300000	84100	9	9	286000	230000	210000	--	--
pme2024	177.1	160	176.095	C10H12N2O	[M+H]+	Serotonin	Alkaloids	Plumerane	50-67-9	A	3180000	3110000	2780000	3880000	2780000	2400000	2690000	2580000	2110000	2040000	1440000	1600000	3140000	3740000	2720000	3180000	2450000	2750000	3760000	4090000	4160000	2650000	2830000	2800000	3720000	3370000	3200000	C00780	ko00380,ko01100
pmb0774	177.1	160.3	176.095	C10H12N2O	[M+H]+	N-Hydroxy tryptamine	Others	Others	-	A	2800000	2850000	2460000	3460000	2500000	2230000	2400000	2560000	2010000	1890000	1270000	1440000	2880000	3380000	2560000	3080000	2190000	2690000	3430000	3660000	3530000	2380000	2570000	2560000	3490000	3040000	2700000	C17203	ko00380,ko01100
pmb3101	175.1	115	176.1	C7H12O5	[M-H]-	2-Isopropylmalate	Organic acids	Organic acids	-	B	420000	195000	218000	952000	1850000	1200000	184000	381000	129000	1690000	1670000	1020000	507000	445000	330000	2510000	3380000	2970000	224000	387000	525000	2500000	3470000	2720000	1290000	1260000	1300000	C02504	ko00290,ko00620,ko01100,ko01110,ko01210,ko01230
pmb0468	178	161	177	C6H11NO3S	[M+H]+	N-formylmethionine	Amino acids and derivatives	Amino acids and derivatives	4289-98-9	B	137000	117000	99900	168000	116000	103000	113000	101000	95400	95700	52200	59000	119000	149000	93100	120000	85000	117000	164000	158000	166000	114000	102000	111000	158000	124000	142000	C03145	ko00270
pmb0786	180	162	179	C6H13NO5	[M+H]+	Glucosamine	Others	Saccharides and Alcohols	3416-24-8	B	504000	591000	451000	581000	659000	585000	602000	510000	517000	803000	680000	769000	471000	507000	366000	528000	639000	636000	492000	501000	423000	695000	707000	681000	743000	710000	743000	C00329	ko00520,ko01100
pmn001682	179.03	135.05	180.042	C9H8O4	[M-H]-	Sorbic acid	Phenolic acids	Phenolic acids	110-44-1	A	101000	60800	66400	17000	19500	80100	112000	64200	38000	66800	186000	88900	231000	107000	979000	111000	87800	88400	110000	55900	45600	84400	24600	51200	110000	118000	110000	--	--
mws2212	179.03	135	180.042	C9H8O4	[M-H]-	Caffeic acid	Phenolic acids	Phenolic acids	331-39-5	A	79500	44600	30300	23600	40900	34300	39100	34000	62900	13400	23000	12500	115000	221000	482000	32100	18400	28100	108000	159000	69100	21700	12400	13600	81400	63100	54600	C01197	ko00940,ko01100,ko01110
mws4170	179.06	59.01	180.063	C6H12O6	[M-H]-	D-Glucose	Others	Saccharides and Alcohols	14431-43-7	A	3400000	2770000	3670000	228000	231000	273000	3970000	3600000	3070000	747000	1340000	630000	3340000	3370000	7480000	816000	840000	981000	5470000	4410000	4160000	2990000	886000	892000	1620000	1740000	1450000	--	--
mws0198	179.06	71	180.063	C6H12O6	[M-H]-	D-(+)-Glucose	Others	Saccharides and Alcohols	50-99-7	A	3240000	2190000	2250000	194000	172000	195000	3350000	2980000	2650000	550000	760000	495000	2870000	2610000	6490000	560000	612000	720000	3850000	3560000	2670000	1830000	658000	526000	1300000	1110000	1060000	C00031	ko00010,ko00030,ko00052,ko00500,ko00520,ko00901,ko01100,ko01110,ko02010
mws0093	179.07	146	180.079	C10H12O3	[M-H]-	Coniferyl alcohol	Phenolic acids	Phenolic acids	458-35-5	B	36900	44000	32300	20600	48200	11300	85500	52500	27100	19700	19300	8850	48900	75600	188000	23100	35400	46300	66700	31400	38300	29400	6890	33000	73800	36800	52200	C00590	ko00940,ko00998,ko01100,ko01110
mws0250	182.08	136.1	181.074	C9H11NO3	[M+H]+	L-(-)-Tyrosine	Amino acids and derivatives	Amino acids and derivatives	60-18-4	A	358000	442000	466000	3710000	2460000	2210000	492000	484000	452000	2490000	2820000	2500000	277000	326000	483000	2310000	2440000	2110000	668000	372000	450000	3060000	3110000	2340000	1950000	1670000	1700000	C00082	ko00130,ko00261,ko00350,ko00360,ko00400,ko00460,ko00730,ko00940,ko00950,ko00965,ko00966,ko00970,ko00998,ko01100,ko01110,ko01210,ko01230
mws1350	181.05	151	182.058	C9H10O4	[M-H]-	Syringic Aldehyde	Phenolic acids	Phenolic acids	134-96-3	B	43700	19000	19000	19600	17600	17100	31800	22200	23900	20700	16500	24000	73300	37900	134000	29000	29900	37800	32500	36700	31200	26200	18200	23800	31800	38500	28000	--	--
mws0214	181.07	71	182.079	C6H14O6	[M-H]-	D-Sorbitol	Others	Saccharides and Alcohols	50-70-4	B	85000	68200	335000	18600	25200	97000	195000	525000	356000	18400	64800	19500	280000	218000	129000	91400	80200	114000	217000	355000	135000	465000	112000	69100	135000	119000	116000	C00794	ko00051,ko00052,ko01100,ko02010
pme2237	181.07	101	182.079	C6H14O6	[M-H]-	Dulcitol	Others	Saccharides and Alcohols	608-66-2	B	106000	82900	397000	26700	32200	128000	245000	636000	465000	37800	88000	22400	349000	290000	120000	123000	85000	152000	257000	461000	153000	608000	149000	95500	150000	152000	131000	C01697	ko00052,ko01100
mws0752	185.15	185.16	186.162	C11H22O2	[M-H]-	Undecylic Acid	Lipids	Free fatty acids	112-37-8	A	401000	415000	444000	1190000	763000	844000	413000	417000	371000	863000	782000	879000	248000	257000	347000	453000	342000	406000	344000	279000	267000	478000	493000	438000	610000	568000	554000	--	--
pmn001492	187.1	123.1	188.041	C11H8O3	[M-H]-	Ayapin	Lignans and Coumarins	Coumarins	494-56-4	A	70100	63100	61400	99700	254000	172000	73600	67900	44100	40100	60300	51500	52100	53200	115000	75500	64400	44700	54500	74400	57400	24400	47400	44300	98200	72100	72100	C18078	--
pme0137	187.07	125	188.08	C7H12N2O4	[M-H]-	N-α-Acetyl-L-glutamine	Amino acids and derivatives	Amino acids and derivatives	2490-97-3	B	22800	21300	20300	70400	58800	25100	13500	22600	14800	64800	55900	57300	26300	22700	19500	27600	28700	23400	24500	31200	28500	36800	21900	28200	46700	34200	45100	--	--
pmn001380	187.1	169.09	188.105	C9H16O4	[M-H]-	Eucommiol	Others	Others	55930-44-4	A	95800	96800	99000	122000	373000	263000	109000	107000	75400	65700	77000	63800	86800	84900	152000	104000	91100	58800	88600	84300	78800	37700	74800	60800	146000	117000	113000	C17878	--
mws0237	187.1	125	188.105	C9H16O4	[M-H]-	Anchoic Acid	Organic acids	Organic acids	123-99-9	A	1180000	1080000	1090000	1490000	4240000	2850000	1300000	1130000	901000	679000	889000	732000	931000	829000	1710000	1150000	951000	659000	970000	1060000	878000	477000	808000	670000	1590000	1290000	1230000	C08261	--
mws5041	189.12	86.1	188.116	C8H16N2O3	[M+H]+	Glycylisoleucine	Amino acids and derivatives	Amino acids and derivatives	19461-38-2	B	80600	71000	73800	185000	197000	156000	62600	72800	73500	142000	154000	250000	84600	115000	1790000	200000	237000	122000	76700	89000	68600	120000	170000	124000	226000	201000	181000	--	--
mws0736	189.12	86	188.116	C8H16N2O3	[M+H]+	N-Glycyl-L-leucine	Amino acids and derivatives	Amino acids and derivatives	869-19-2	A	105000	100000	111000	213000	239000	211000	84300	116000	96300	219000	215000	381000	122000	146000	2210000	299000	338000	149000	114000	127000	106000	161000	220000	188000	317000	272000	259000	C02155	--
pme0075	188.1	128	189.064	C7H11NO5	[M-H]-	N-Acetyl-L-glutamic acid	Amino acids and derivatives	Amino acids and derivatives	1188-37-0	B	98600	45500	45900	83100	42000	54800	40500	59600	41300	96300	77200	75100	138000	90600	114000	54400	53500	69400	33200	75600	94400	142000	140000	138000	80600	104000	101000	C00624	ko00220,ko01100,ko01110,ko01210,ko01230
mws0193	190.12	127	189.111	C7H15N3O3	[M+H]+	L-Homocitrulline	Amino acids and derivatives	Amino acids and derivatives	1190-49-4	B	14800	14000	10100	37300	50000	54500	17600	11700	8730	25300	45200	31900	5950	8450	19900	36100	30600	29700	23800	19400	14000	45400	26700	27900	28300	27800	31900	C02427	--
mws1611	191.11	173.4	190.099	C12H14O2	[M+H]+	Ligustilide	Others	Others	4431-01-0	A	7740	15300	13500	17700	18100	13100	11200	9930	11000	9130	9660	5160	7040	5290	6230	11300	12700	9340	9020	5990	9350	10200	10400	9220	12300	9780	8150	C16987	--
mws0281	191.02	111	192.027	C6H8O7	[M-H]-	Citric Acid	Organic acids	Organic acids	77-92-9	A	9020000	8430000	8120000	6910000	8610000	8950000	9700000	8780000	8630000	9040000	11300000	10900000	7190000	6450000	5920000	11500000	13200000	12100000	5420000	8830000	6280000	14200000	16700000	15500000	11600000	9200000	9830000	C00158	ko00020,ko00250,ko00630,ko01100,ko01110,ko01200,ko01210,ko01230
Hmdp002169	193.05	133.02	192.043	C10H8O4	[M+H]+	6-Hydroxy-7-methoxy-coumarin	Lignans and Coumarins	Coumarins	-	B	89400	83600	64600	68700	69300	58000	62300	62000	61100	50500	43100	53300	47700	41800	58700	50300	42600	48200	53400	62800	54800	38500	33000	32600	68700	59800	51700	--	--
mws0277	191.06	85	192.063	C7H12O6	[M-H]-	Kinic acid	Organic acids	Organic acids	77-95-2	A	8200000	7580000	7460000	12700000	12000000	12200000	8240000	7380000	7410000	12800000	12800000	11800000	6310000	7010000	5700000	16300000	14000000	14000000	5070000	7700000	6000000	12900000	16200000	15900000	11300000	11300000	11600000	C00296	ko00400,ko01100
mws1515	193.16	175	192.151	C13H20O	[M+H]+	α-Lonone	Others	Others	127-41-3	A	69400	71500	70000	104000	39300	56400	56900	79100	63300	38700	30800	31400	48600	45100	116000	39600	39300	44400	56700	45500	57700	35500	49900	38400	71200	58800	55900	C12286	--
pme3705	193.04	73	194.043	C6H10O7	[M-H]-	D-Glucoronic acid	Others	Saccharides and Alcohols	6556/12/3	B	21500	22100	15800	28000	33700	40100	16800	21400	22000	33100	42800	32700	17100	14700	21100	40900	38800	49100	12500	16300	20300	54400	47700	47300	44800	34900	41200	C00191	ko00040,ko00053,ko00520,ko00562,ko01100
mws1354	193.05	133.8	194.058	C10H10O4	[M-H]-	Trans-ferulic acid	Phenolic acids	Phenolic acids	537-98-4	A	1550000	501000	564000	649000	1880000	984000	816000	523000	561000	1160000	2360000	3080000	2040000	907000	13300000	1140000	844000	911000	872000	808000	593000	655000	355000	576000	2190000	1430000	1630000	--	--
mws0014	193.05	134.01	194.058	C10H10O4	[M-H]-	Ferulic acid	Phenolic acids	Phenolic acids	1135-24-6	A	1780000	523000	672000	758000	2070000	1140000	894000	613000	593000	1280000	2620000	3880000	2320000	1020000	14800000	1540000	980000	1040000	956000	779000	653000	759000	417000	619000	2480000	1910000	1830000	C01494	ko00940,ko01100,ko01110
pme0534	195.05	74.9	196.058	C6H12O7	[M-H]-	Gluconic acid	Others	Saccharides and Alcohols	526-95-4	B	801000	801000	818000	547000	639000	674000	754000	716000	736000	614000	760000	562000	606000	505000	442000	610000	594000	685000	633000	608000	517000	781000	602000	659000	893000	716000	734000	C00257	ko00030,ko01100,ko01110,ko01200
mws0027	197.05	123	198.053	C9H10O5	[M-H]-	Syringic acid	Phenolic acids	Phenolic acids	530-57-4	A	64100	9920	11000	16500	67400	41500	35200	30000	17400	16100	31700	26600	224000	59300	722000	74100	64900	50900	42400	64400	27800	23300	14200	22700	78700	55500	94700	C10833	--
mws0923	200.05	154.04	199.04	C9H10ClNO2	[M+H]+	L-2-chlorophenylalanine	Amino acids and derivatives	Amino acids and derivatives	103616-89-3	A	600000	582000	572000	454000	483000	514000	557000	602000	594000	494000	552000	525000	542000	596000	530000	514000	513000	498000	423000	537000	567000	495000	525000	503000	660000	588000	516000	--	--
pme1419	164.07	104	199.043	C6H14ClNO2S	[M-Cl]+	L-Methionine methyl ester	Amino acids and derivatives	Amino acids and derivatives	2491-18-1	B	31700	29800	42800	51200	37900	43600	16600	22900	24500	41200	42300	39200	34600	40700	33000	46300	43300	43200	42800	38000	33600	45900	43900	49800	40400	35200	38500	--	--
pmb2640	199.17	181	200.178	C12H24O2	[M-H]-	Lauric acid	Lipids	Free fatty acids	143-07-7	A	16400	10700	10300	20100	14300	18500	11700	13000	11300	17400	17100	18200	7510	8590	14100	16600	10700	15400	11600	12400	10200	14400	14900	15000	15600	15200	13100	C02679	ko00061,ko01100,ko01110
Lmzn002605	201.11	183.11	202.101	C10H18O4	[M-H]-	Sebacic acid	Organic acids	Organic acids	111-20-6	A	8110	7050	8470	7690	5680	5390	8340	6220	7030	3610	3740	4560	5610	5890	10400	3290	5000	3290	4870	8230	4320	2670	3470	3540	7120	4850	7570	--	--
mws5037	203.14	86.1	202.132	C9H18N2O3	[M+H]+	Alanylleucine	Amino acids and derivatives	Amino acids and derivatives	1999-42-4	B	61000	85300	94000	44100	27300	22800	54900	56600	81900	27100	54100	41200	83400	114000	87200	34700	55300	46100	139000	97300	107000	74000	78600	63600	87800	74300	69300	--	--
mws0018	203.22	83	202.216	C10H26N4	[M+H]+	Spermine	Alkaloids	Phenolamine	71-44-3	B	11400000	10600000	9940000	10300000	9890000	10800000	8790000	9960000	10300000	11100000	10800000	11000000	7560000	7940000	9430000	9110000	9450000	8580000	10100000	7770000	8580000	9230000	9710000	8520000	11500000	10500000	8950000	C00750	ko00330,ko00410,ko00480,ko00770,ko01100
mws0282	203.08	116	204.09	C11H12N2O2	[M-H]-	L-Tryptophan	Amino acids and derivatives	Amino acids and derivatives	73-22-3	A	3250000	5180000	5940000	41500000	31000000	31900000	7100000	5390000	6850000	36500000	40400000	36200000	2600000	2870000	2900000	29400000	33600000	31000000	6960000	2900000	3310000	42700000	40900000	35400000	30200000	26400000	26500000	C00078	ko00260,ko00380,ko00400,ko00901,ko00966,ko00970,ko00998,ko01100,ko01110,ko01210,ko01230
pmb0818	206.1	147.5	205.074	C11H11NO3	[M+H]+	Methoxyindoleacetic acid	Alkaloids	Plumerane	3471-31-6	B	113000	166000	231000	3040000	2130000	2030000	235000	205000	241000	2540000	3130000	2420000	82500	92300	117000	1610000	1850000	1720000	252000	93800	114000	2830000	2460000	1960000	1410000	1360000	1250000	C05660	ko00380
pme1261	206.14	76	205.131	C9H19NO4	[M+H]+	Pantothenol	Others	Saccharides and Alcohols	16485-10-2	B	26700	13800	21200	141000	33100	29700	9800	8760	8940	8240	9960	8390	19500	11900	31200	53300	24200	29000	8190	13700	5370	8320	8220	7630	28200	21400	31000	C05944	ko00770
mws2125	166.98	78.7	205.938	C3H4KO6P	[M-K]-	Phosphoenolpyruvic acid	Organic acids	Organic acids	4265-07-0	B	82100	109000	125000	33300	18700	26100	70700	113000	95000	15400	19000	20100	107000	110000	20200	43600	34200	28900	96200	63200	84200	35100	27600	54600	65500	57300	51400	--	--
mws1076	207.07	151	206.058	C11H10O4	[M+H]+	Scoparone	Lignans and Coumarins	Coumarins	120-08-1	B	85600	5560	9	5500	9900	8410	6600	7040	4800	6260	9	6070	112000	15900	266000	7050	9	7330	5990	11300	8720	9	9	9	34100	21600	19000	C09311	--
pmb1587	207.14	165.2	206.131	C13H18O2	[M+H]+	4-Hydroxy-3,5-diisopropylbenzaldehyde	Phenolic acids	Phenolic acids	10537-86-7	B	18300	17900	19700	43600	17500	22100	14200	18300	16400	13100	9580	12300	14500	14000	27100	14900	11400	16100	16100	11500	16500	14700	17800	15400	19200	17200	18700	--	--
pme3443	207.07	192	208.074	C11H12O4	[M-H]-	Sinapinaldehyde	Phenolic acids	Phenolic acids	4206-58-0	B	99900	143000	119000	12400	22900	21200	155000	132000	120000	19000	8280	9730	88600	114000	89600	21700	17000	19500	119000	91900	94000	27200	19900	18500	71700	52700	58200	C05610	ko00940,ko01100,ko01110
mws1212	209.08	177.3	208.074	C11H12O4	[M+H]+	Methyl ferulate	Phenolic acids	Phenolic acids	2309/7/1	B	35100	50000	60500	27400	47900	43700	41000	28900	39200	47100	66900	61400	39300	55100	30100	64600	59800	68600	47500	51800	53400	108000	43600	61900	54200	53100	49700	--	--
pmb2620	207.07	133.1	208.074	C11H12O4	[M-H]-	3,4-Dimethoxycinnamic acid	Phenolic acids	Phenolic acids	14737-89-4	A	57400	62000	89300	47600	78200	65800	59800	42500	53100	74800	119000	103000	54900	67000	32400	99400	93600	98400	75200	71600	74000	158000	82000	106000	84200	75700	88300	--	--
Hmcn000192	209.07	59.01	210.073	C7H14O7	[M-H]-	Sedoheptulose	Others	Saccharides and Alcohols	3019-74-7	A	540000	580000	671000	145000	149000	189000	579000	523000	508000	188000	234000	92900	397000	440000	442000	167000	207000	250000	567000	581000	475000	372000	230000	242000	295000	259000	274000	C02076	ko00710,ko01100
pme1654	209.12	59.02	210.126	C12H18O3	[M-H]-	Jasmonic acid	Organic acids	Organic acids	77026-92-7	B	576000	257000	392000	236000	105000	71600	775000	607000	671000	73600	90300	38500	386000	666000	232000	37600	63800	175000	131000	300000	392000	32900	26700	71500	315000	281000	268000	C08491	ko00592,ko01100,ko01110,ko04075
pme0170	217.13	158	216.122	C8H16N4O3	[M+H]+	N-α-Acetyl-L-arginine	Amino acids and derivatives	Amino acids and derivatives	155-84-0	B	80500	42000	84100	47100	17100	12600	62300	88700	84000	12400	24900	17400	76100	81400	119000	27700	25200	24100	108000	77300	74000	37000	31000	21900	74700	55200	37400	--	--
pme2566	217.08	199	218.09	C8H14N2O5	[M-H]-	(5-L-Glutamyl)-L-amino acid	Amino acids and derivatives	Amino acids and derivatives	5875-41-2	B	135000	196000	125000	258000	183000	159000	186000	192000	189000	169000	175000	210000	142000	133000	150000	143000	109000	137000	210000	190000	131000	136000	119000	110000	172000	152000	149000	C03740	ko00480,ko01100
mws1337	220.12	202.1	219.111	C9H17NO5	[M+H]+	D-Pantothenic Acid	Others	Vitamin	79-83-4	A	628000	539000	479000	1510000	1170000	1250000	558000	716000	537000	1040000	981000	1000000	426000	532000	570000	1190000	1180000	1160000	588000	603000	596000	1080000	1290000	1250000	1120000	903000	947000	C00864	ko00410,ko00770,ko01100,ko01110
pme2755	222	144	221.09	C8H15NO6	[M+H]+	N-Acetyl-D-glucosamine	Others	Saccharides and Alcohols	7512-17-6	B	349000	339000	318000	346000	358000	381000	361000	357000	325000	372000	391000	372000	299000	288000	296000	345000	336000	334000	317000	321000	304000	351000	363000	367000	399000	406000	434000	C00140	ko00520,ko01100,ko02010
mws5042	223.11	120.09	222.1	C11H14N2O3	[M+H]+	Glycylphenylalanine	Amino acids and derivatives	Amino acids and derivatives	721-66-4	A	74800	41900	47200	136000	206000	168000	50600	67400	50600	134000	199000	288000	93900	76400	1780000	207000	360000	94700	45500	52900	36300	97200	207000	138000	211000	156000	180000	--	--
Hmgp005956	223.13	149.02	222.125	C13H18O3	[M+H]+	Dehydrovomifoliol	Terpenoids	Sesquiterpenoids	15764-81-5	B	17400	20400	22100	26200	17800	22200	21100	22200	27000	18400	18700	19600	15500	17500	8700	17900	16500	15600	19300	21600	24400	13800	19500	16600	20500	17400	16800	--	--
mws0520	224.09	136	223.084	C11H13NO4	[M+H]+	N-Acetyl-L-tyrosine	Amino acids and derivatives	Amino acids and derivatives	537-55-3	B	13000	17700	18600	101000	158000	163000	16200	16100	10500	169000	205000	257000	17900	24600	31400	103000	130000	79400	20800	15300	19100	110000	123000	151000	98400	92800	84300	--	--
mws4085	223.06	193	224.068	C11H12O5	[M-H]-	Sinapic acid	Phenolic acids	Phenolic acids	530-59-6	A	81100	42300	38500	17900	34900	12900	50700	32000	26300	17600	30400	20600	314000	71800	1670000	49000	23000	43300	90600	81500	51400	21300	7990	24300	127000	107000	116000	C00482	ko00940,ko01100,ko01110
pmp000452	225.15	85	224.141	C13H20O3	[M+H]+	Annuionone D	Others	Others	-	A	572000	552000	571000	821000	593000	707000	596000	648000	588000	600000	667000	745000	325000	346000	208000	526000	582000	420000	373000	289000	406000	442000	501000	446000	688000	617000	474000	--	--
pmb2643	225.19	207	226.193	C14H26O2	[M-H]-	Myristoleic acid	Lipids	Free fatty acids	544-64-9	A	3350	9	5200	6050	3080	5050	2070	2610	3670	3150	2790	3120	3540	2380	16900	18100	8010	10700	9890	13500	11000	14600	16200	29000	10300	8060	9850	C08322	--
pme1194	228.1	112	227.091	C9H13N3O4	[M+H]+	Deoxycytidine	Nucleotides and derivatives	Nucleotides and derivatives	951-77-9	B	32800	31500	24200	114000	83200	54900	51300	72200	31800	171000	99200	190000	37300	36300	1140000	89800	126000	35300	31200	29100	33300	65800	95400	53300	142000	110000	118000	C00881	ko00240,ko01100,ko02010
mws0119	227.2	227.2	228.209	C14H28O2	[M-H]-	Myristic Acid	Lipids	Free fatty acids	544-63-8	A	22100000	19000000	21400000	18100000	15100000	17400000	18400000	20500000	16700000	18300000	19300000	18700000	16000000	16300000	25300000	27300000	22200000	25800000	22200000	23700000	20100000	27500000	28800000	35000000	23500000	20100000	21700000	--	--
pmb0490	235.14	147.04	234.137	C13H18N2O2	[M+H]+	p-Coumaroylputrescine	Alkaloids	Phenolamine	34136-53-3	A	1940000	1930000	3720000	4470000	6460000	4780000	9640000	1920000	873000	8040000	5440000	5230000	1980000	1040000	539000	3790000	3110000	4430000	719000	586000	848000	2350000	2100000	1670000	3750000	3550000	3250000	C18326	ko00330,ko01100
pmb0962	235.1	118.3	234.158	C10H22N2O4	[M+H]+	Lysine butyrate	Amino acids and derivatives	Amino acids and derivatives	80407-71-2	B	6340000	5740000	2470000	10000000	9480000	9600000	3770000	5760000	3760000	9700000	11800000	8340000	6470000	5960000	12000000	13500000	15700000	13900000	8370000	8030000	6570000	12800000	15200000	14800000	13800000	9380000	9010000	--	--
mws4176	237.12	120.09	236.116	C12H16N2O3	[M+H]+	DL-Alanyl-DL-phenylalanine	Amino acids and derivatives	Amino acids and derivatives	1999-45-7	B	22800	7600	8910	32000	27100	23100	11200	14200	13200	44300	30800	66700	31200	22000	925000	46700	48000	22400	10300	16200	9980	22300	35700	31700	83200	64000	66000	--	--
Lmhn003240	237.04	121.03	238.048	C11H10O6	[M-H]-	Benzoylmalic acid	Phenolic acids	Phenolic acids	-	A	2320000	2180000	2030000	2840000	2210000	2330000	1970000	1790000	2140000	1750000	1940000	1820000	119000	164000	782000	277000	408000	244000	368000	161000	200000	575000	778000	830000	1630000	1310000	1540000	--	--
pmn001669	237.08	147	238.084	C12H14O5	[M-H]-	Methyl sinapate	Phenolic acids	Phenolic acids	20733-94-2	B	9500	7620	15200	2690	5780	5400	6960	5060	5610	5750	7380	4430	13600	18200	4880	13900	13500	15100	17500	15100	12300	14300	10100	15000	10800	10200	11800	--	--
pme2827	239	223	240.245	C16H32O	[M-H]-	Palmitaldehyde	Others	Others	629-80-1	B	6310000	5810000	5780000	5060000	6890000	5440000	5660000	5540000	8060000	6530000	6070000	6210000	6070000	6070000	4910000	6210000	5820000	6170000	5370000	5730000	5880000	5990000	6150000	6580000	12400000	13000000	12800000	C00517	ko00071
pme0264	243.1	127	242.09	C10H14N2O5	[M+H]+	Thymidine	Nucleotides and derivatives	Nucleotides and derivatives	50-89-5	A	28100	13800	21600	145000	385000	516000	35500	72300	25000	322000	411000	561000	33300	26900	596000	213000	277000	39300	21000	21900	20600	65800	173000	73600	179000	195000	174000	C00214	ko00240,ko01100
mws0359	241.22	241.22	242.225	C15H30O2	[M-H]-	Pentadecanoic Acid	Lipids	Free fatty acids	1002-84-2	B	369000	280000	398000	149000	111000	158000	297000	290000	219000	129000	161000	133000	223000	205000	559000	444000	365000	463000	381000	399000	381000	544000	517000	869000	538000	451000	500000	--	--
pme3732	244.09	112	243.086	C9H13N3O5	[M+H]+	Cytidine	Nucleotides and derivatives	Nucleotides and derivatives	65-46-3	A	2430000	529000	457000	561000	959000	804000	418000	571000	469000	517000	440000	1110000	2740000	908000	4960000	981000	916000	523000	583000	956000	700000	258000	417000	374000	1160000	1070000	917000	C00475	ko00240,ko01100,ko02010
mws0976	243.06	153	244.07	C9H12N2O6	[M-H]-	β-Pseudouridine	Nucleotides and derivatives	Nucleotides and derivatives	1445-07-4	B	39000	27300	21000	20000	59100	51100	40500	63600	45500	9	9	9	18600	37300	29600	36200	9	38000	24100	38600	26900	20400	22800	9	39700	18000	22200	C02067	ko00240,ko01100
mws0248	243.06	110	244.07	C9H12N2O6	[M-H]-	Uridine	Nucleotides and derivatives	Nucleotides and derivatives	58-96-8	B	513000	101000	88400	216000	393000	419000	121000	126000	126000	288000	323000	511000	744000	259000	1980000	483000	417000	315000	183000	277000	208000	152000	278000	178000	448000	459000	511000	C00299	ko00240,ko01100,ko02010
pmb2591	245.09	203.2	246.1	C13H14N2O3	[M-H]-	Acetyltryptophan	Amino acids and derivatives	Amino acids and derivatives	2280/1/5	A	651000	432000	376000	833000	2520000	1580000	466000	571000	646000	742000	973000	1370000	803000	1450000	1380000	1200000	1550000	954000	797000	1150000	1130000	2560000	1730000	1810000	1320000	1250000	1280000	C03137	--
pme2563	249.06	128	250.062	C8H14N2O5S	[M-H]-	γ-Glu-Cys	Amino acids and derivatives	Amino acids and derivatives	636-58-8	B	28200	55500	47000	75700	49800	46900	64900	78300	79000	89100	108000	78600	28100	79500	4920	95400	80400	120000	121000	127000	86900	99200	85900	98900	89900	80200	66900	C00669	ko00480,ko01100
pme3961	252.11	136	251.102	C10H13N5O3	[M+H]+	Deoxyadenosine	Nucleotides and derivatives	Nucleotides and derivatives	958-09-8	A	453000	170000	162000	1940000	1510000	993000	529000	454000	282000	2760000	3540000	4740000	289000	151000	2880000	561000	419000	236000	163000	123000	134000	774000	888000	268000	1290000	1150000	1160000	C00559	ko00230,ko01100,ko02010
mws0361	253.22	235.19	254.225	C16H30O2	[M-H]-	Palmitoleic Acid	Lipids	Free fatty acids	373-49-9	A	7710	5390	9270	7000	3370	6490	5500	6340	6550	4760	4460	5870	5310	6030	34000	36400	17100	26100	12400	22400	18300	29300	30600	55000	20100	18500	17900	C08362	ko00061
pma3101	256.2	124.1	256.082	C11H14NO6+	[M+H]+	Nicotinate D-ribonucleoside	Others	Vitamin	17720-18-2	B	3070000	2540000	2470000	1780000	1400000	1360000	2600000	2660000	2200000	1850000	1570000	1500000	2620000	2100000	3770000	1730000	1900000	2020000	2110000	2240000	1990000	2370000	2030000	1880000	2750000	2200000	1920000	C05841	ko00760,ko01100
pmn001578	255.23	255.23	256.24	C16H32O2	[M-H]-	Hexadecanoic acid	Lipids	Free fatty acids	1957/10/3	A	180000	86600	82300	47400	50300	72100	73000	95100	76700	63400	80400	69100	169000	112000	149000	59300	71300	92300	119000	109000	106000	86900	71900	83400	125000	78300	87600	C00249	ko00061,ko00062,ko00071,ko00073,ko01040,ko01100,ko01212
mws0120	258.11	104.11	257.103	C8H20NO6P	[M+H]+	Choline alfoscerate	Lipids	PC	28319-77-9	A	285000	287000	292000	436000	620000	616000	260000	224000	252000	844000	822000	1150000	448000	268000	97600	924000	1040000	1460000	408000	234000	216000	1210000	916000	1010000	1240000	860000	772000	--	--
pme1187	257.08	124	258.085	C10H14N2O6	[M-H]-	5-Methyluridine	Nucleotides and derivatives	Nucleotides and derivatives	1463-10-1	B	4230	4520	3500	30800	76600	69900	2570	3650	4050	17900	20700	23100	3120	5030	5190	18300	25600	17800	3680	3560	5140	8040	18400	20100	20500	19600	21200	--	--
mws1090	259.02	97	260.03	C6H13O9P	[M-H]-	Glucose-1-phosphate	Others	Saccharides and Alcohols	59-56-3	A	1780000	827000	1030000	923000	447000	634000	1230000	1390000	1160000	1120000	905000	858000	1450000	948000	1250000	703000	535000	852000	1010000	608000	543000	806000	767000	703000	1150000	999000	1100000	--	--
mws0866	259.02	97	260.03	C6H13O9P	[M-H]-	D-Glucose 6-phosphate	Others	Saccharides and Alcohols	56-73-5	B	1540000	814000	919000	876000	429000	580000	1210000	1380000	1130000	1040000	862000	879000	1320000	892000	1230000	678000	528000	729000	908000	565000	547000	818000	749000	684000	1170000	1020000	1040000	C00092	ko00500,ko00562,ko00998,ko01100,ko01110
pmb0896	265.15	177.05	264.147	C14H20N2O3	[M+H]+	N-Feruloylputrescine	Alkaloids	Phenolamine	501-13-3	A	2690000	733000	1470000	3960000	9530000	3970000	1560000	2560000	1070000	10100000	7000000	5370000	1270000	1670000	520000	7890000	7090000	10900000	914000	1130000	1330000	13000000	16600000	10200000	5490000	5470000	6110000	C10497	ko00330,ko01100
pme0230	268.1	136.06	267.097	C10H13N5O4	[M+H]+	Adenosine	Nucleotides and derivatives	Nucleotides and derivatives	58-61-7	A	52100000	15900000	10300000	30500000	15000000	15800000	14800000	12300000	11400000	43200000	38900000	50700000	7480000	2650000	7120000	10400000	5080000	7220000	10200000	4130000	4720000	6180000	9050000	2890000	22300000	19800000	19800000	C00212	ko00230,ko01100,ko02010
pme1184	268.1	152	267.097	C10H13N5O4	[M+H]+	Deoxyguanosine	Nucleotides and derivatives	Nucleotides and derivatives	961-07-9	A	176000	104000	107000	1380000	2830000	3600000	229000	471000	168000	2280000	2650000	4070000	138000	122000	4160000	1750000	2130000	255000	154000	148000	125000	572000	1900000	512000	1360000	1240000	1250000	C00330	ko00230,ko01100,ko02010
mws1060	267.07	135	268.081	C10H12N4O5	[M-H]-	9-(β-D-Arabinofuranosyl)hypoxanthine	Nucleotides and derivatives	Nucleotides and derivatives	7013-16-3	A	388000	206000	204000	342000	378000	398000	269000	274000	300000	497000	555000	602000	403000	417000	537000	191000	182000	273000	141000	201000	277000	218000	244000	267000	367000	358000	355000	--	--
mws0383	267.23	267.23	268.24	C17H32O2	[M-H]-	Cis-10-Heptadecenoic Acid	Lipids	Free fatty acids	29743-97-3	A	954000	606000	742000	399000	444000	561000	685000	927000	665000	578000	785000	749000	825000	848000	2540000	1510000	1060000	1380000	1590000	1560000	1550000	1670000	1410000	2630000	1210000	1090000	1200000	--	--
pme0376	271.06	151	272.068	C15H12O5	[M-H]-	Naringenin	Flavonoids	Dihydroflavone	480-41-1	A	13900	10400	10800	9	9	9	9700	8770	9750	9	9	9	9480	13300	9	9	9	9	17600	9800	7530	9	9	9	6710	5520	7150	C00509	ko00941,ko00943,ko01100,ko01110
mws1140	271.06	151	272.068	C15H12O5	[M-H]-	Naringenin chalcone(4,2',4',6'-Tetrahydroxychalcone)	Flavonoids	Chalcones	73692-50-9	A	33400	13900	29900	5060	9870	6220	25900	18800	14200	8070	10800	16300	75000	48000	246000	8530	9060	4480	46400	42200	26300	6660	7750	5630	36400	33600	35800	C06561	ko00941,ko01100,ko01110
mws0914	271.06	151	272.068	C15H12O5	[M-H]-	Pinobanksin	Flavonoids	Dihydroflavonol	548-82-3	A	13700	10700	10600	9	9	9	11400	8080	10800	9	9	9	9050	11000	9	9	9	9	18100	13300	6590	9	9	9	7450	5760	5690	C09826	ko00941
pmp001264	274.27	256.27	273.267	C16H35NO2	[M+H]+	Hexadecylsphingosine	Lipids	Sphingolipids	-	A	548000	554000	600000	911000	604000	595000	816000	660000	697000	579000	452000	420000	527000	666000	386000	550000	596000	413000	644000	513000	575000	538000	572000	741000	686000	630000	581000	--	--
pme1712	275	257	276.132	C11H20N2O6	[M-H]-	L-Saccharopine	Amino acids and derivatives	Amino acids and derivatives	997-68-2	B	11300	9860	9110	136000	183000	173000	6490	10100	10400	79500	105000	83800	6430	5730	8340	90700	121000	143000	9880	6480	5970	143000	160000	151000	100000	78600	87600	C00449	ko00300,ko00310,ko01100,ko01110,ko01230
pmb0508	277.17	147.04	276.159	C14H20N4O2	[M+H]+	p-Coumaroylagmatine	Alkaloids	Phenolamine	7295-86-5	A	69300	31200	37400	67600	135000	47700	86000	164000	23900	97600	61500	84000	42200	39400	22700	85600	59200	58900	65800	103000	34600	50000	41700	29400	63300	59200	57400	C04498	ko00330,ko01100
pmb1574	277.2	93	276.2	C18H28O2	[M+H]+	Octadecadien-6-ynoic acid	Lipids	Glycerol ester	-	B	145000	73900	57100	69400	62700	63400	75400	102000	81600	50900	63100	73700	84500	145000	127000	35500	29000	28100	151000	194000	108000	37100	26400	21400	97500	101000	88500	--	--
mws1038	277.12	146	278.13	C11H22N2O4S	[M-H]-	(R)-Pantetheine	Others	Others	496-65-1	A	99500	87100	102000	133000	143000	134000	96300	105000	118000	186000	202000	186000	128000	228000	109000	182000	241000	161000	270000	203000	300000	329000	278000	311000	231000	179000	185000	C00831	ko00332,ko00770,ko01110
mws5035	279.17	120.08	278.163	C15H22N2O3	[M+H]+	Leucylphenylalanine	Amino acids and derivatives	Amino acids and derivatives	56217-82-4	B	110000	41000	48000	75000	69100	56600	62000	56500	66200	94800	93200	117000	275000	120000	3490000	82900	68400	46600	67900	128000	61600	45200	63500	59300	284000	232000	224000	--	--
pmb1650	279.2	149.4	278.2	C18H30O2	[M+H]+	Octadeca-11E,13E,15Z-trienoic acid	Lipids	Glycerol ester	25575-00-2	B	2240000	3060000	3960000	5440000	3820000	3670000	3400000	3580000	4370000	4630000	5210000	5400000	3790000	3600000	2050000	4480000	4090000	3990000	2950000	3110000	4350000	3560000	3520000	3420000	3840000	3300000	3290000	--	--
mws0366	277.22	277.22	278.225	C18H30O2	[M-H]-	γ-Linolenic Acid	Lipids	Free fatty acids	506-26-3	A	136000	99600	93200	80500	86800	103000	97000	104000	96700	119000	140000	161000	113000	149000	110000	95600	106000	107000	158000	155000	129000	106000	88200	95900	125000	112000	115000	--	--
pmb0889	279.23	95.1	278.225	C18H30O2	[M+H]+	Punicic acid	Lipids	Free fatty acids	544-72-9	A	605000	278000	277000	421000	425000	440000	372000	933000	423000	272000	306000	346000	736000	378000	1860000	319000	235000	223000	579000	525000	391000	266000	226000	197000	650000	531000	528000	C08364	--
mws0629	281.11	166	280.106	C13H16N2O5	[M+H]+	Asp-phe	Amino acids and derivatives	Amino acids and derivatives	13433-09-5	B	25700	19400	24000	102000	96100	94300	17000	29200	24300	73800	84200	97900	26400	36900	512000	91700	112000	84800	19700	15600	25000	103000	146000	130000	101000	79900	72700	--	--
YC512118	282.28	247.24	281.272	C18H35NO	[M+H]+	Octadecenoic amide	Others	Others	-	A	28500	16500	36600	34900	15400	13800	20800	31200	8940	21300	64200	15100	36400	20400	142000	20000	21600	12400	29000	44600	36900	18900	22900	22200	39800	30000	31000	--	--
mws0396	281.25	281.25	282.256	C18H34O2	[M-H]-	Elaidic Acid	Lipids	Free fatty acids	112-79-8	A	19800000	11700000	12700000	5810000	15500000	14100000	13600000	46200000	12200000	15300000	16300000	23200000	21500000	24200000	35800000	28700000	27300000	31300000	26400000	19700000	21300000	29200000	22400000	30300000	24900000	18900000	22100000	--	--
mws1490	281.25	281.3	282.256	C18H34O2	[M-H]-	Oleic Acid	Lipids	Free fatty acids	112-80-1	B	47900	20200	16300	8210	26900	16100	12100	22700	13900	36000	48200	59600	21700	61600	22600	20600	14500	20300	49000	47300	28700	17500	5390	12400	41600	31400	29400	--	--
mws2623	281.25	281.25	282.256	C18H34O2	[M-H]-	11-Octadecanoic acid(Vaccenic acid)	Lipids	Free fatty acids	506-17-2	A	6250000	3760000	3690000	1790000	4810000	4610000	4210000	16400000	3810000	4800000	5380000	7780000	7060000	7770000	11900000	9460000	9040000	10600000	8360000	6220000	6740000	9380000	7160000	10200000	8000000	6310000	7520000	--	--
pme1178	284.1	152	283.092	C10H13N5O5	[M+H]+	Guanosine	Nucleotides and derivatives	Nucleotides and derivatives	118-00-3	A	10700000	1470000	1360000	4300000	11400000	12300000	1290000	1800000	1420000	4980000	5650000	10700000	10800000	3410000	16600000	6610000	7290000	2840000	2180000	3300000	2250000	1630000	4240000	2630000	6620000	6020000	5320000	C00387	ko00230,ko01100,ko02010
Lmhn002423	283.05	167.04	284.053	C12H12O8	[M-H]-	vnilloylmalic acid	Phenolic acids	Phenolic acids	-	B	21200	13200	20800	28800	28300	29800	12700	16900	17000	20100	29700	20300	5900	6140	17900	12700	13200	13200	7530	13200	13700	37300	27900	22200	24900	17900	22700	--	--
mws0668	283.07	151	284.076	C10H12N4O6	[M-H]-	Xanthosine	Nucleotides and derivatives	Nucleotides and derivatives	146-80-5	A	825000	569000	605000	742000	1260000	1590000	605000	623000	838000	749000	730000	818000	723000	953000	658000	750000	448000	481000	425000	499000	401000	521000	498000	522000	791000	748000	811000	C01762	ko00230,ko00232,ko01100,ko01110,ko02010
mws1489	283.26	283.26	284.272	C18H36O2	[M-H]-	Stearic Acid	Lipids	Free fatty acids	1957/11/4	A	32700000	38300000	32200000	31000000	34100000	30900000	31900000	29400000	32300000	25400000	28400000	24800000	31600000	38000000	39900000	31800000	32200000	32800000	35000000	31000000	37000000	30200000	30700000	31200000	2980000	2610000	3230000	--	--
pme0088	285.04	151	286.048	C15H10O6	[M-H]-	Luteolin	Flavonoids	Flavonoid	491-70-3	A	88000	32200	33100	5060	17700	7880	56400	35300	38800	32500	47900	48900	153000	54400	471000	32500	14400	15600	77000	57600	38900	18200	10600	12000	85400	79300	99300	C01514	ko00941,ko00944,ko01100,ko01110
Lmgn002843	285.05	199.04	286.048	C15H10O6	[M-H]-	2'-Hydroxyisoflavone	Flavonoids	Isoflavones	-	A	52600	18800	23100	3300	8710	4700	29100	22800	24100	15300	29600	26700	91700	35000	267000	17500	8520	9320	48500	32900	23200	13300	5270	6960	49400	49000	50500	--	--
mws1436	287.29	97.2	286.287	C18H38O2	[M+H]+	1,18-Octadecanediol	Lipids	Free fatty acids	3155-43-9	B	9670	3080	3490	14600	12600	7910	4940	5800	3200	8050	6630	8150	2480	9	3170	1890	1980	2370	9	9	9	9	9	9	4960	4670	4410	--	--
pmb3081	289	97	290.004	C6H11PO11	[M-H]-	Glucarate O-Phosphoric acid	Others	Saccharides and Alcohols	-	B	3970000	3940000	2510000	1370000	2300000	2510000	3240000	2600000	2760000	2050000	2010000	2100000	1860000	1580000	1210000	2830000	2290000	3000000	2350000	3280000	2170000	2630000	2650000	3300000	3500000	3030000	2520000	--	--
pme3163	289	97	290.04	C7H15O10P	[M-H]-	D-Sedoheptuiose 7-phosphate	Others	Saccharides and Alcohols	2646-35-7	B	2990000	2640000	1830000	761000	1320000	1570000	2300000	2070000	1810000	1240000	1200000	1320000	1180000	1020000	799000	1740000	1560000	1770000	1680000	2870000	1330000	1890000	1790000	2150000	2220000	2550000	1470000	--	--
pmn001728	289.12	203.08	290.127	C15H18N2O4	[M-H]-	N-Acetyl-DL-tryptophan	Amino acids and derivatives	Amino acids and derivatives	87-32-1	A	238000	173000	154000	333000	824000	592000	238000	216000	218000	297000	212000	601000	310000	460000	508000	404000	566000	397000	300000	389000	565000	812000	632000	683000	451000	507000	431000	--	--
pmb0885	291	190.9	290.188	C18H26O3	[M+H]+	4-oxo-9Z,11Z,13E,15E-octadecatetraenoic acid	Lipids	Glycerol ester	-	B	142000	123000	120000	200000	112000	150000	114000	144000	117000	107000	82000	83600	119000	109000	198000	91000	97800	101000	132000	119000	130000	82900	108000	106000	140000	140000	138000	--	--
HmLn007772	293.18	221.16	294.183	C17H26O4	[M-H]-	Nordihydrocapsiate	Phenolic acids	Phenolic acids	220012-53-3	A	532000	546000	521000	784000	647000	647000	455000	442000	559000	522000	689000	515000	630000	779000	688000	555000	549000	517000	579000	554000	515000	466000	598000	565000	878000	804000	844000	--	--
pma3606	295.2	179.2	294.219	C18H30O3	[M+H]+	9-Hydroxy-10,12,15-octadecatrienoic acid	Lipids	Glycerol ester	-	B	601000	347000	315000	359000	402000	445000	395000	1160000	489000	308000	324000	372000	861000	447000	2360000	320000	247000	280000	591000	566000	467000	295000	239000	226000	654000	605000	581000	--	--
pmb2787	293.21	275.1	294.219	C18H30O3	[M-H]-	9-KODE	Lipids	Free fatty acids	54232-59-6	A	346000	148000	119000	136000	139000	144000	164000	208000	179000	150000	171000	196000	337000	295000	647000	105000	78000	95900	362000	384000	225000	112000	71900	89000	254000	229000	231000	--	--
pmb2786	293.21	275	294.219	C18H30O3	[M-H]-	9-HOTrE	Lipids	Free fatty acids	89886-42-0	B	775000	382000	305000	714000	710000	775000	458000	544000	490000	647000	804000	1100000	697000	519000	2550000	456000	402000	269000	669000	675000	483000	335000	384000	244000	682000	621000	639000	--	--
pmn001688	295.23	195.14	296.235	C18H32O3	[M-H]-	9S-Hyroxy-10E,12E-octadecadienoic acid	Lipids	Free fatty acids	-	A	484000	209000	210000	344000	344000	385000	305000	841000	355000	222000	240000	270000	607000	343000	1310000	252000	203000	202000	470000	478000	358000	222000	189000	188000	465000	437000	416000	--	--
pmb2778	295.23	277.3	296.235	C18H32O3	[M-H]-	9,10-EODE	Lipids	Free fatty acids	65167-83-1	A	1010000	508000	490000	777000	786000	837000	674000	1680000	794000	498000	548000	646000	1600000	772000	4840000	562000	450000	442000	1140000	1010000	779000	476000	434000	383000	1210000	1100000	1110000	--	--
pme1474	298.1	136	297.09	C11H15N5O3S	[M+H]+	5'-Deoxy-5'-(methylthio)adenosine	Nucleotides and derivatives	Nucleotides and derivatives	2457-80-9	A	12200000	13500000	13900000	53300000	54200000	52400000	12700000	15200000	14600000	23400000	24700000	25000000	6460000	8500000	8040000	19700000	20000000	23600000	12300000	9090000	11300000	21000000	23300000	23400000	23500000	23700000	23100000	C00170	ko00270,ko00908,ko01100
pmf0297	297.32	183.1	298.324	C20H42O	[M-H]-	1-Eicosanol	Lipids	Glycerol ester	629-96-9	B	34500	22700	37500	41700	24100	22600	38000	48200	40500	17000	30500	18300	22200	33500	60000	67300	50200	68800	116000	95300	67300	70900	68400	86700	57000	55000	58000	--	--
pmp000548	301.07	286.04	300.063	C16H12O6	[M+H]+	Pratensein	Flavonoids	Isoflavones	2284-31-3	B	337000	116000	92900	34300	132000	76100	129000	133000	140000	147000	205000	313000	525000	264000	1910000	189000	132000	62000	257000	213000	190000	96700	91000	72800	411000	402000	386000	C10520	ko00943
mws0058	299.06	284	300.063	C16H12O6	[M-H]-	Diosmetin	Flavonoids	Flavonoid	520-34-3	A	1040000	364000	327000	113000	403000	255000	493000	419000	442000	490000	724000	1120000	2000000	934000	6530000	669000	471000	239000	887000	835000	642000	326000	354000	265000	1260000	1220000	1200000	--	--
Zmhp003514	301.07	286.05	300.063	C16H12O6	[M+H]+	6,7,8-Tetrahydroxy-5-methoxyflavone	Flavonoids	Flavonoid	-	A	338000	129000	99300	38700	127000	76900	139000	148000	126000	151000	205000	326000	530000	284000	2000000	197000	142000	69600	269000	233000	188000	106000	95600	76900	404000	400000	402000	--	--
pma1116	301.1	286	300.063	C16H12O6	[M+H]+	Kaempferide	Flavonoids	Flavonols	491-54-3	B	17600	32900	14100	30700	27500	13700	28400	17200	15200	22700	13300	12100	51900	46700	39800	38600	30000	38700	45800	56400	39500	46400	19800	29700	37200	35200	24300	C10098	ko00944
pmp000001	301.07	286.05	300.063	C16H12O6	[M+H]+	Hispidulin	Flavonoids	Flavonoid	1447-88-7	B	350000	119000	103000	36800	132000	77600	137000	129000	126000	157000	198000	316000	539000	267000	1830000	199000	145000	67300	248000	233000	182000	106000	92600	77200	410000	386000	391000	C10058	--
Zmxn001997	299.08	137.02	300.084	C13H16O8	[M-H]-	Isosalicylic acid O-glycoside	Phenolic acids	Phenolic acids	-	A	267000	162000	258000	311000	486000	387000	248000	290000	265000	360000	418000	361000	104000	115000	10700	205000	195000	167000	192000	144000	138000	291000	252000	285000	300000	281000	282000	--	--
Zmhn001926	299.08	137.02	300.084	C13H16O8	[M-H]-	Salicylic acid O-glycoside	Phenolic acids	Phenolic acids	-	A	257000	168000	249000	312000	426000	439000	245000	241000	284000	382000	386000	391000	97700	130000	7150	182000	221000	184000	215000	143000	146000	260000	252000	262000	244000	217000	261000	--	--
Hmtn001302	299.08	137.02	300.085	C13H16O8	[M-H]-	Glucosyloxybenzoic acid	Phenolic acids	Phenolic acids	-	A	232000	171000	258000	325000	473000	424000	242000	249000	232000	355000	399000	388000	99200	144000	3890	189000	232000	172000	214000	164000	153000	269000	234000	277000	318000	256000	258000	--	--
mws2367	299.11	119	300.121	C14H20O7	[M-H]-	Salidroside	Phenolic acids	Phenolic acids	10338-51-9	B	37200	23000	33000	115000	114000	144000	27700	59000	44700	40700	48200	48700	29500	41100	25000	41800	28100	33900	32400	33200	38400	36100	32200	41100	60200	51100	52600	C06046	ko00350,ko01100
pme2816	301.2	209.2	300.209	C20H28O2	[M+H]+	4-Oxoretinol	Others	Vitamin	62702-55-0	B	11500	8720	7930	15100	6640	8950	10400	12300	8100	9250	8470	9520	8720	6410	11800	7330	9540	9050	8800	5190	8010	6620	10100	7170	9280	9060	7900	C16683	--
GQ512003	307.18	177.05	306.169	C15H22O3N4	[M+H]+	Fer-agmatine	Alkaloids	Phenolamine	-	B	1120000	465000	102000	127000	619000	197000	461000	811000	261000	593000	239000	261000	954000	2050000	1650000	2600000	880000	1760000	1060000	5600000	2660000	526000	2260000	857000	1280000	1190000	1200000	--	--
pmb0496	307.18	177.05	306.169	C15H22N4O3	[M+H]+	N-Feruloylagmatine	Alkaloids	Phenolamine	-	A	1120000	431000	107000	136000	524000	178000	440000	830000	196000	521000	264000	299000	1050000	2220000	1560000	2860000	1020000	1870000	1000000	6130000	2730000	444000	2360000	822000	1300000	1080000	1240000	C18325	ko00330,ko01100
pme1373	306.05	110	307.057	C9H14N3O7P	[M-H]-	2'-Deoxycytidine-5'-monophosphate	Nucleotides and derivatives	Nucleotides and derivatives	1032-65-1	B	10500	9270	12500	27200	16400	17000	5150	11300	12800	23900	24100	26300	8940	17000	7900	26800	24500	27900	17100	14800	15400	30800	34400	38800	15900	13600	25600	C00239	ko00240,ko01100
pme1086	306.08	143	307.084	C10H17N3O6S	[M-H]-	Glutathione reduced form	Amino acids and derivatives	Amino acids and derivatives	70-18-8	A	541000	1270000	1320000	3450000	1480000	1600000	895000	1040000	1030000	2250000	2300000	2100000	379000	1900000	21600	3430000	2980000	3470000	2360000	2140000	1850000	4140000	3600000	4390000	2180000	2390000	1940000	C00051	ko00270,ko00480,ko01100,ko02010
pmn001610	307.26	307.3	308.272	C20H36O2	[M-H]-	Eicosadienoic acid	Lipids	Free fatty acids	5598-38-9	A	638000	500000	434000	166000	489000	325000	507000	499000	574000	406000	489000	410000	812000	1290000	1680000	387000	396000	322000	1240000	1280000	899000	278000	235000	262000	571000	586000	496000	C16525	ko01040
Lmhn003074	309.06	193.05	310.069	C14H14O8	[M-H]-	Feruloylmalic acid	Phenolic acids	Phenolic acids	-	B	36300	26300	20200	74000	115000	68700	26900	33600	35400	72100	75800	70000	27000	29600	36800	99600	72100	115000	25000	36700	15600	115000	92600	104000	69900	71700	72500	--	--
pmn001606	309.28	309.3	310.287	C20H38O2	[M-H]-	Eicosenoic acid	Lipids	Free fatty acids	26764-41-0	A	81900	70700	85600	73500	65900	74400	73700	90200	61800	84700	88000	91300	69600	68700	95600	122000	86100	120000	93200	84600	82300	118000	128000	161000	109000	103000	106000	C16526	ko01040
pme3967	312.13	180	311.123	C12H17N5O5	[M+H]+	2-(Dimethylamino)guanosine	Nucleotides and derivatives	Nucleotides and derivatives	2140-67-2	B	469000	223000	321000	972000	3660000	3350000	193000	378000	277000	183000	301000	557000	553000	564000	816000	365000	379000	101000	345000	356000	364000	89800	247000	172000	647000	674000	612000	--	--
pmb2933	311.1	149.1	312.048	C13H12O9	[M-H]-	Caftaric acid	Phenolic acids	Phenolic acids	67879-58-7	B	736000	729000	758000	1190000	795000	827000	673000	766000	743000	904000	867000	865000	547000	685000	664000	611000	738000	655000	1140000	788000	1060000	797000	690000	649000	806000	838000	875000	--	--
pmb2804	311.1	171.3	312.1	C18H32O4	[M-H]-	13-HPODE	Lipids	Glycerol ester	33964-75-9	B	17400	16300	10000	10500	10100	12400	11300	52700	15200	6920	8580	9970	25200	11400	82600	8010	7620	7580	21300	15700	13400	7070	5990	6640	20100	17900	16600	C04717	ko00591,ko01100
pmn001689	311.22	223.17	312.23	C18H32O4	[M-H]-	9-Hydroxy-12-oxo-10-octadecenoic acid	Lipids	Free fatty acids	-	B	46300	15400	13000	56900	38000	101000	17800	23500	22400	18600	21700	19800	46000	49300	99300	13400	13300	15600	47700	56100	33700	12900	9040	10400	33900	33100	34500	--	--
pmp001255	314.14	177.05	313.131	C18H19NO4	[M+H]+	N-Trans-feruloyltyramine	Alkaloids	Phenolamine	66648-43-9	B	6720	5560	9390	1800	3140	5500	8890	9810	7190	3090	2810	4420	5720	10700	19400	9	9	9	21600	18100	8720	17500	3230	3500	11800	9710	9460	C02717	--
pmp001256	314.14	177.05	313.131	C18H19NO4	[M+H]+	N-Cis-feruloyltyramine	Alkaloids	Phenolamine	80510-09-4	B	5970	4320	9610	2900	4220	4680	7870	11000	5640	4140	9	4330	7010	8730	21400	1890	1860	3350	20900	20200	10500	18500	2640	3160	9930	6720	8160	--	--
Rfmb089	313.24	295.23	314.246	C18H34O4	[M-H]-	9,10-Dihydroxy-12-octadecenoic acid	Lipids	Free fatty acids	263399-34-4	A	208000	239000	285000	431000	360000	299000	275000	332000	276000	227000	192000	132000	243000	415000	115000	240000	252000	267000	483000	447000	487000	231000	233000	226000	316000	300000	306000	--	--
pmb2871	315.07	153	316.079	C13H16O9	[M-H]-	2,5-Dihydroxy benzoic acid O-hexside	Phenolic acids	Phenolic acids	-	A	1810000	1280000	909000	1390000	930000	1260000	1110000	1680000	965000	632000	721000	742000	800000	552000	608000	1080000	883000	957000	1490000	759000	1060000	826000	846000	1000000	997000	953000	1120000	--	--
pmn001367	315.07	153.02	316.079	C13H16O9	[M-H]-	Protocatechuic acid-4-glucoside	Phenolic acids	Phenolic acids	-	A	1620000	1210000	869000	1300000	930000	1710000	1170000	1620000	947000	628000	713000	741000	1080000	777000	608000	951000	828000	870000	1060000	1090000	1520000	887000	883000	1030000	1010000	1030000	1040000	--	--
pmn001553	315.11	153.1	316.116	C14H20O8	[M-H]-	Cimidahurinine	Phenolic acids	Phenolic acids	142542-89-0	B	400000	392000	392000	558000	401000	370000	341000	386000	325000	470000	652000	566000	344000	404000	302000	398000	419000	425000	610000	390000	415000	517000	442000	416000	461000	457000	503000	--	--
Hmtn001120	315.11	153.06	316.116	C14H20O8	[M-H]-	5-(2-Hydroxyethyl)-2-O-glucosylohenol	Phenolic acids	Phenolic acids	-	B	305000	298000	288000	432000	292000	329000	256000	311000	253000	354000	487000	442000	289000	281000	194000	339000	347000	328000	467000	302000	336000	353000	351000	326000	342000	380000	391000	--	--
pme3459	317.21	299	316.204	C20H28O3	[M+H]+	Caffeyl alcohol	Phenolic acids	Phenolic acids	469-83-0	B	68400	56500	51200	52500	38900	47200	52600	60600	55900	39300	28500	31200	60200	46900	69300	34200	34700	40300	49600	49500	55400	30700	40100	35600	53100	44200	56600	C09066	--
mws0582	322.11	130	321.099	C11H19N3O6S	[M+H]+	S-(methyl)glutathione	Amino acids and derivatives	Amino acids and derivatives	2922-56-7	A	21500	14900	24800	87800	45600	28400	9	9	9	103000	83100	74600	27600	9180	11900	147000	133000	188000	39100	17000	28800	169000	147000	179000	77700	64200	77600	C11347	--
mws0983	326.31	62.06	325.298	C20H39NO2	[M+H]+	N-Oleoylethanolamine	Others	Others	111-58-0	B	33600	23700	26500	105000	45400	43100	27700	41500	38000	19800	20500	24200	48200	44000	72300	62600	33700	38900	44200	54100	46900	54000	65800	60500	47600	37200	37600	--	--
pmn001419	325.09	163.04	326.1	C15H18O8	[M-H]-	1-O-[(E)-p-Cumaroyl]-β-D-glucopyranose	Phenolic acids	Phenolic acids	-	B	1270000	1420000	1660000	1280000	867000	905000	1380000	1210000	1290000	1290000	1240000	1540000	1510000	1620000	1290000	1670000	1430000	1820000	2500000	1570000	1850000	2000000	1710000	1860000	1550000	1520000	1690000	--	--
Hmlp002408	328.1	148.03	327.095	C14H17NO8	[M+H]+	HBOA-Glc	Alkaloids	Alkaloids	-	A	313000	255000	186000	237000	328000	275000	273000	310000	192000	162000	114000	181000	518000	565000	330000	594000	640000	669000	471000	574000	530000	498000	488000	456000	434000	371000	341000	--	--
Zmhn001102	327.07	165.02	328.08	C14H16O8	[M-H]-	5,7-Dyhydroxy-1(3H)-isobenzofuran-one-O-glucoside	Others	Others	-	B	148000	150000	108000	157000	86300	86000	140000	149000	130000	82200	67800	86000	112000	88400	84400	76200	85300	55400	200000	124000	134000	86200	85800	57600	82100	126000	125000	--	--
pmn001690	327.14	165.09	328.152	C16H24O7	[M-H]-	3-Hydroxy-4-isopropylbenzylalcohol 3-glucoside	Phenolic acids	Phenolic acids	-	B	146000	141000	196000	194000	135000	161000	161000	158000	152000	173000	179000	146000	133000	152000	173000	174000	172000	165000	259000	202000	183000	201000	210000	198000	166000	175000	190000	--	--
pmn001691	327.22	291.2	328.225	C18H32O5	[M-H]-	9,12,13-Trihyroxy-10,15-octadecadienoic acid	Lipids	Free fatty acids	-	A	489000	315000	335000	274000	508000	514000	359000	424000	420000	234000	250000	348000	678000	343000	3850000	251000	227000	113000	202000	207000	273000	166000	213000	114000	522000	508000	501000	--	--
mws0884	328.05	134.2	329.053	C10H12N5O6P	[M-H]-	Cyclic AMP	Nucleotides and derivatives	Nucleotides and derivatives	60-92-4	A	191000	41500	23700	75200	39900	31600	36700	31100	24000	134000	96600	159000	21300	6340	7090000	22400	8690	26900	21500	7580	13700	15000	18200	12700	67900	52300	54200	C00575	ko00230,ko01100
Lmzp004885	331.08	315.05	330.074	C17H14O7	[M+H]+	Tricin	Flavonoids	Flavonoid	520-32-1	A	4870000	3510000	3120000	1050000	2210000	1840000	3670000	4290000	3550000	1470000	1440000	1860000	3970000	4350000	9340000	1870000	1490000	1080000	5110000	3990000	3700000	1500000	1140000	1090000	4450000	4200000	3980000	C10193	--
pmb3894	329.07	229.1	330.074	C17H14O7	[M-H]-	Di-O-methylquercetin	Flavonoids	Flavonols	2068/2/2	A	445000	410000	400000	387000	724000	727000	359000	452000	410000	201000	237000	301000	592000	448000	4090000	250000	236000	181000	292000	303000	373000	162000	221000	176000	725000	561000	605000	C01265	ko00944
Lmtn002565	329.11	167.03	330.095	C14H18O9	[M-H]-	1'-O-Vanilloyl-β-D-glucoside	Phenolic acids	Phenolic acids	-	A	665000	749000	516000	861000	457000	562000	728000	697000	694000	614000	536000	596000	257000	318000	125000	177000	157000	153000	350000	292000	408000	210000	259000	218000	484000	480000	451000	--	--
Zmhn001375	329.09	209.05	330.096	C14H18O9	[M-H]-	Vanillic acid-C-glucoside	Others	Others	-	B	529000	581000	664000	1100000	1080000	1070000	542000	576000	579000	1090000	1030000	1010000	746000	1110000	50900	1480000	1380000	1370000	1410000	1110000	1130000	2050000	1690000	1740000	1050000	1070000	1110000	--	--
pmn001517	329.12	167	330.131	C15H22O8	[M-H]-	3,4,5-Trimethoxyphenyl-β-D-Glucopyranoside	Phenolic acids	Phenolic acids	-	B	5620000	5970000	4800000	10500000	8440000	8110000	5350000	5990000	5260000	6560000	5820000	5950000	6940000	7310000	6070000	11700000	11000000	10900000	8980000	7790000	8690000	9930000	10600000	11200000	7780000	8790000	9020000	--	--
pmn001694	329.23	229.15	330.241	C18H34O5	[M-H]-	9,10,13-Trihyroxy-11-octadecadienoic acid	Lipids	Free fatty acids	-	A	768000	690000	724000	753000	1380000	1310000	635000	796000	736000	396000	432000	560000	1090000	855000	7550000	480000	431000	330000	530000	562000	692000	304000	419000	333000	1120000	1100000	1180000	--	--
pmn001495	329.27	229.1	330.277	C19H38O4	[M-H]-	Hexadecanoic acid 2,3-dihydroxypropyl ester	Lipids	Glycerol ester	542-44-9	A	775000	742000	744000	785000	1460000	1440000	692000	827000	802000	418000	500000	595000	1190000	871000	8060000	505000	462000	350000	558000	586000	724000	329000	463000	346000	1210000	1140000	1220000	--	--
pme3184	332.08	136	331.068	C10H14N5O6P	[M+H]+	2'-Deoxyadenosine-5'-monophosphate	Nucleotides and derivatives	Nucleotides and derivatives	653-63-4	B	367000	365000	406000	616000	386000	407000	417000	378000	395000	590000	505000	491000	267000	312000	204000	493000	460000	598000	370000	307000	334000	437000	450000	410000	418000	406000	398000	C00360	ko00230,ko01100
pmb0789	332.1	314.3	331.127	C14H21NO8	[M+H]+	Pyridoxine-5'-O-glucoside	Others	Vitamin	-	B	4430000	5050000	4320000	8150000	4910000	5820000	4560000	5470000	4580000	8170000	8410000	7050000	2790000	3330000	2730000	7850000	5670000	7450000	4100000	3430000	3970000	5450000	5490000	6470000	5110000	5370000	5530000	C03996	--
pmc0066	333.05	137.05	332.052	C10H13N4O7P	[M+H]+	2'-Deoxyinosine-5'-monophosphate	Nucleotides and derivatives	Nucleotides and derivatives	3393-18-8	B	398000	333000	580000	15800	46700	62500	210000	347000	315000	17200	11600	18400	1720000	1370000	1910000	67000	63200	77600	459000	773000	797000	48100	34200	51200	139000	136000	83700	C06196	ko00230
HmLn000659	331.07	169.01	332.075	C13H16O10	[M-H]-	3-O-Galloyl-β-D-glucose	Tannins	Tannin	-	A	242000	108000	350000	186000	164000	140000	230000	109000	95000	151000	119000	124000	3640000	4250000	3080000	3830000	3700000	3150000	4320000	3940000	4580000	3720000	3390000	4040000	1670000	2140000	2340000	--	--
pmb0498	337.19	207.07	336.18	C16H24N4O4	[M+H]+	Sinapoylagmatine	Alkaloids	Phenolamine	-	A	338000	135000	141000	565000	557000	236000	237000	145000	170000	246000	137000	436000	147000	137000	179000	436000	318000	238000	103000	241000	267000	192000	654000	272000	285000	265000	251000	--	--
pmb0382	339.09	177.2	338.079	C19H14O6	[M+H]+	O-Feruloyl 4-hydroxylcoumarin	Lignans and Coumarins	Coumarins	-	A	966000	1700000	2060000	1040000	1230000	1400000	1270000	1220000	1820000	2100000	1560000	1410000	1430000	951000	1450000	523000	782000	749000	1620000	1330000	1500000	1640000	841000	1010000	1210000	1120000	1290000	--	--
pmn001421	337.09	191.05	338.1	C16H18O8	[M-H]-	3-O-(E)-p-Coumaroyl quinic acid	Phenolic acids	Phenolic acids	87099-71-6	A	1830000	2200000	3300000	40400	59200	60900	2450000	2080000	2040000	287000	311000	546000	4420000	3800000	2110000	350000	237000	352000	8350000	4370000	2610000	357000	171000	165000	1730000	1800000	1740000	--	--
pmp000232	339.11	147.04	338.1	C16H18O8	[M+H]+	Cis-3-p-coumaric quinic acid	Phenolic acids	Phenolic acids	-	A	330000	450000	251000	961000	1810000	807000	381000	518000	387000	445000	412000	341000	178000	167000	77700	573000	611000	645000	193000	40600	141000	295000	238000	250000	514000	424000	444000	--	--
pmp000231	339.11	147.04	338.1	C16H18O8	[M+H]+	Trans-3-O-p-coumaric quinic acid	Phenolic acids	Phenolic acids	-	A	617000	693000	981000	15500	23800	28600	754000	581000	595000	94000	107000	206000	1340000	1070000	545000	163000	107000	112000	2270000	1400000	906000	151000	92400	114000	571000	551000	652000	--	--
pma0149	341.08	207.07	340.079	C15H16O9	[M+H]+	Sinapoyl malate	Phenolic acids	Phenolic acids	92344-58-6	B	14900	22900	17500	72400	72800	60700	25700	28200	32900	83400	73000	79700	10500	13500	13100	94800	106000	84500	16200	18200	17500	133000	137000	113000	57000	60800	57900	C02887	ko00940
pma6561	341	135	342.095	C15H18O9	[M-H]-	Caffeic acid 3-glucoside	Phenolic acids	Phenolic acids	24959-81-7	B	127000	153000	143000	97200	85200	93200	174000	127000	149000	339000	453000	403000	109000	125000	99500	137000	126000	132000	168000	134000	131000	246000	156000	175000	168000	169000	156000	C10431	--
mws1080	341.11	179	342.116	C12H22O11	[M-H]-	Galactinol	Others	Saccharides and Alcohols	3687-64-7	A	22100000	28000000	29000000	5350000	3610000	4090000	17700000	13500000	14400000	12300000	13000000	9120000	22800000	26100000	20600000	11500000	13000000	14400000	24700000	19100000	16500000	19900000	9660000	12800000	11800000	13200000	12800000	--	--
mws0264	341.11	119	342.116	C12H22O11	[M-H]-	D-(+)-TrehaloseAnhydrous	Others	Saccharides and Alcohols	99-20-7	A	5950000	5700000	8720000	1040000	864000	890000	4380000	2540000	3010000	2720000	3350000	1870000	5310000	5600000	5100000	1980000	2930000	2960000	5710000	3990000	4070000	4860000	2400000	2840000	2310000	2630000	2920000	--	--
pme0519	341.11	119	342.116	C12H22O11	[M-H]-	D-(+)-Sucrose	Others	Saccharides and Alcohols	57-50-1	A	10200000	12800000	15900000	1740000	1250000	1400000	8800000	6280000	5740000	4910000	5150000	3650000	10100000	12700000	9070000	4380000	5320000	5420000	12600000	8320000	6920000	8480000	4210000	5450000	4360000	5230000	4760000	--	--
mws5038	341.11	89.02	342.116	C12H22O11	[M-H]-	Isomaltulose	Others	Saccharides and Alcohols	13718-94-0	A	10100000	12900000	15000000	2760000	2150000	2470000	9660000	6490000	6410000	6910000	5930000	3890000	12200000	12500000	10100000	5100000	6490000	7710000	12300000	9330000	8040000	9020000	4980000	6480000	5920000	6440000	6590000	--	--
mws1333	341.11	113	342.116	C12H22O11	[M-H]-	Melibiose	Others	Saccharides and Alcohols	585-99-9	A	3820000	4670000	5180000	691000	563000	559000	3240000	1800000	2470000	1950000	2040000	1190000	4410000	5040000	3180000	1480000	1920000	1900000	4150000	3020000	2120000	3150000	1680000	2090000	1800000	1680000	1870000	C05402	ko00052,ko01100,ko02010
mws0906	341.12	179	342.131	C16H22O8	[M-H]-	Coniferin	Phenolic acids	Phenolic acids	531-29-3	B	334000	542000	759000	9	21200	50400	445000	271000	388000	538000	1090000	1070000	439000	522000	9	246000	237000	226000	1020000	530000	532000	1080000	565000	514000	429000	442000	470000	C00761	ko00940
pmb2211	343.3	240.7	342.288	C19H38N2O3	[M+H]+	Cocamidopropyl βine	Alkaloids	Alkaloids	4292/10/8	A	206000	188000	260000	739000	313000	266000	202000	177000	190000	228000	210000	202000	167000	205000	273000	444000	282000	278000	215000	309000	181000	245000	279000	317000	272000	276000	255000	--	--
Wmxn002362	342.08	180.03	343.083	C14H17NO9	[M-H]-	DIBOA-glucoside	Alkaloids	Alkaloids	-	A	29200000	24800000	21600000	31600000	35200000	30800000	28900000	30400000	29500000	26700000	24600000	27100000	16100000	17500000	3960000	29100000	27300000	35800000	22600000	21600000	18400000	30900000	32300000	27600000	25900000	26800000	28300000	--	--
mws1474	345.1	284	344.09	C18H16O7	[M+H]+	5,7-Dihydroxy-3',4',5'-trimethoxyflavone	Flavonoids	Flavonoid	18103-42-9	A	231000	181000	97600	467000	1290000	822000	207000	266000	211000	168000	216000	443000	3530	4710	34300	17300	11300	16100	4560	4030	3170	11000	10500	12200	212000	217000	211000	C19807	--
mws0609	344.04	150	345.047	C10H12N5O7P	[M-H]-	Guanosine 3',5'-cyclic monophosphate	Nucleotides and derivatives	Nucleotides and derivatives	7665-99-8	A	391000	317000	305000	630000	758000	1360000	371000	452000	366000	132000	193000	571000	407000	493000	8810000	416000	600000	254000	166000	156000	215000	202000	238000	431000	711000	802000	783000	C00942	ko00230,ko01100
pmb0801	346.11	184.1	345.106	C14H19NO9	[M+H]+	4-Pyridoxic acid O-hexoside	Others	Vitamin	-	A	739000	549000	707000	1430000	914000	846000	652000	698000	531000	995000	1010000	921000	664000	701000	612000	1840000	1460000	1930000	857000	700000	753000	1950000	1630000	1760000	1030000	1020000	971000	--	--
mws1002	345.06	330	346.069	C17H14O8	[M-H]-	Syringetin	Flavonoids	Flavonols	4423-37-4	A	10100	12000	7560	70600	138000	94400	9720	16500	10200	38300	48300	75000	3890	3960	5930	4710	3960	4120	5220	3970	3390	4270	4230	3320	32800	29100	30200	C11620	ko00944
Lmgn002933	345.1	315.05	346.106	C18H18O7	[M-H]-	5,7-Dihydroxy-2',3',4'-trimethoxydihydroisoflavone	Flavonoids	Dihydroisoflavone	-	B	13500	9670	9540	97100	178000	132000	12700	16300	14400	49000	58200	90100	3410	3690	8090	5170	3930	4410	6030	3510	4180	5070	3850	5330	35900	38800	37600	--	--
pmb0981	348.07	136	347.063	C10H14N5O7P	[M+H]+	Adenosine 5'-monophosphate	Nucleotides and derivatives	Nucleotides and derivatives	61-19-8	B	131000	18600	19000	188000	69800	73100	25100	33300	21300	81700	39500	173000	33500	19700	32800	80800	36500	85500	32800	19600	25500	25300	30800	30200	53800	45500	38100	C00020	ko00230,ko00908,ko01100,ko01110
pmb0149	351.25	147.1	350.246	C21H34O4	[M+H]+	MAG(18:4)	Lipids	Glycerol ester	-	A	457000	45800	53100	16600	11000	13000	105000	75600	74200	9	9	9	499000	92200	40400	7260	4600	6700	63700	104000	84700	9	9	9	87600	85800	75400	--	--
mws4108	353.14	189.1	352.131	C21H20O5	[M+H]+	1-Methoxyphaseollin	Others	Others	157226-48-7	B	32000	20500	18400	7580	12500	6490	21700	21100	27900	16800	21300	26400	34500	72400	56300	24900	20000	24100	47700	66400	51200	7390	8780	7820	32200	31900	39900	--	--
pmb0770	353.15	177.1	352.142	C20H20N2O4	[M+H]+	N-Feruloyl serotonin	Alkaloids	Phenolamine	68573-23-9	B	2950	2850	5040	1380	96300	5350	50600	123000	4390	9390	6610	5820	2340	8970	7850	5570	5240	5470	3760	2410	2790	26900	23400	26100	23200	19200	18700	--	--
mws0967	351.22	271.21	352.225	C20H32O5	[M-H]-	5(S),6(R)-Lipoxin A4	Lipids	Free fatty acids	89663-86-5	B	8180	6480	12100	9	9	9	6870	4680	6060	4050	2640	3370	7880	9630	11500	4860	5330	4360	14800	9270	10800	3390	9	2470	7210	8430	9100	C06314	ko00590
pmb2444	353.27	261.3	352.261	C21H36O4	[M+H]+	MAG(18:3)	Lipids	Glycerol ester	-	A	16700000	19000000	16000000	43500000	43000000	39600000	19800000	17600000	18700000	47500000	51600000	43300000	11500000	13500000	17200000	31600000	23700000	25000000	21100000	17400000	16100000	28400000	30200000	20300000	31300000	30600000	30800000	--	--
pme1816	353.09	191	354.095	C16H18O9	[M-H]-	Neochlorogenic acid(5-O-Caffeoylquinic acid)	Phenolic acids	Phenolic acids	906-33-2	A	29900000	25700000	34900000	3830000	2800000	6350000	31400000	31300000	32200000	14900000	13000000	20000000	44900000	36600000	29600000	33100000	26400000	27800000	61100000	38900000	32300000	25800000	16500000	18500000	28300000	30900000	31200000	C17147	--
mws2108	353.09	135.1	354.095	C16H18O9	[M-H]-	Cryptochlorogenic acid	Phenolic acids	Phenolic acids	905-99-7	B	522000	475000	698000	550000	298000	638000	657000	652000	519000	1280000	1360000	1610000	1270000	1170000	898000	2990000	2390000	2950000	1770000	1300000	934000	2470000	2270000	2030000	1130000	1380000	1380000	--	--
mws0178	353.09	191.01	354.095	C16H18O9	[M-H]-	Chlorogenic acid	Phenolic acids	Phenolic acids	327-97-9	A	24600000	22600000	31800000	3650000	2320000	6330000	25100000	26200000	28000000	13500000	10900000	17800000	39700000	31900000	27700000	28800000	22400000	24300000	55100000	35200000	29100000	21700000	15100000	16100000	25000000	26900000	27900000	C00852	ko00940,ko00941,ko00945,ko01110
pmb0890	355.28	263.3	354.277	C21H38O4	[M+H]+	MAG(18:2)	Lipids	Glycerol ester	-	A	4140000	4720000	4000000	8400000	9350000	8710000	4260000	5320000	4180000	10700000	12300000	8860000	3800000	4620000	5110000	8270000	4990000	5800000	7650000	6030000	5860000	6210000	6190000	4040000	6820000	6520000	6300000	--	--
pmp001283	355.28	337.27	354.277	C21H38O4	[M+H]+	Glyceryl linoleate	Lipids	Glycerol ester	26545-74-4	A	58200	29200	26300	14800	23200	20100	25800	33300	39800	19400	22400	19800	67500	147000	21300	50800	33600	48200	91500	157000	110000	22700	16700	28200	56600	52000	57500	--	--
Zmhn002422	355.1	193.05	356.11	C16H20O9	[M-H]-	Feruloyl glucose	Phenolic acids	Phenolic acids	-	B	195000	175000	217000	383000	384000	342000	240000	215000	175000	316000	317000	416000	254000	331000	260000	533000	568000	563000	303000	276000	279000	529000	555000	776000	337000	358000	382000	C17759	--
pmb0296	357.3	265.4	356.293	C21H40O4	[M+H]+	MAG(18:1)	Lipids	Glycerol ester	-	A	417000	117000	107000	20500	32100	22800	148000	117000	193000	37200	45100	48500	509000	373000	262000	83000	45600	56600	386000	516000	385000	30000	22800	34700	210000	194000	194000	--	--
Wmxn003644	356.1	194.05	357.099	C15H19NO9	[M-H]-	HMBOA-glucoside	Alkaloids	Alkaloids	-	A	8100000	9100000	9080000	15900000	24400000	21300000	9560000	8690000	10600000	17000000	17100000	15500000	4760000	9550000	1560000	10500000	10400000	13800000	8620000	9240000	9340000	11200000	14100000	11900000	11200000	11500000	11600000	--	--
mws0097	357.13	151	358.142	C20H22O6	[M-H]-	Pinoresinol	Lignans and Coumarins	Lignans	487-36-5	A	9110	14000	10400	9580	32700	29600	11700	12300	10300	7700	6720	20700	11600	20900	150000	15200	18200	7420	18900	15900	11300	4660	9050	5130	18600	20000	18500	--	--
pmb3107	359.1	182.1	360.106	C15H20O10	[M-H]-	Syringic acid O-glucoside	Phenolic acids	Phenolic acids	-	B	2410000	2290000	2260000	3040000	2440000	2340000	2320000	2180000	2160000	2270000	1890000	2170000	1730000	1550000	1410000	2470000	1940000	2190000	1900000	1790000	1700000	2090000	2300000	2180000	2160000	2250000	2300000	--	--
mws5040	365.11	203.05	364.078	C12H21O11Na	[M+H]+	Turanose	Others	Saccharides and Alcohols	547-25-1	A	2430000	2590000	1680000	2990000	1910000	1810000	1730000	1860000	2220000	6200000	5480000	6180000	2820000	2700000	889000	4490000	3200000	3360000	2190000	2310000	1950000	3560000	5500000	5160000	2140000	3320000	3910000	--	--
pmb0964	366.2	204.1	365.17	C16H23N5O5	[M+H]+	Isopentenyladenine-7-N-glucoside	Nucleotides and derivatives	Nucleotides and derivatives	-	B	164000	128000	138000	176000	119000	117000	123000	123000	131000	397000	346000	395000	191000	163000	59600	270000	204000	247000	135000	122000	137000	268000	328000	322000	177000	217000	226000	--	--
mws0179	367.1	190.9	368.111	C17H20O9	[M-H]-	Chlorogenic acid methyl ester	Phenolic acids	Phenolic acids	29708-87-0	B	8280000	8100000	12400000	157000	339000	358000	9430000	8280000	7890000	1310000	1270000	2990000	17300000	17600000	16500000	2330000	1710000	1630000	26100000	20100000	16300000	1940000	1200000	1510000	8200000	7200000	7870000	--	--
pmb0752	369.12	177.1	368.111	C17H20O9	[M+H]+	3-O-Feruloyl quinic acid	Phenolic acids	Phenolic acids	1899-29-2	A	16300000	10900000	20700000	5430000	6890000	7990000	18100000	12800000	15900000	8440000	6110000	13300000	33500000	33600000	28400000	28400000	22500000	22800000	34700000	33800000	32100000	22900000	21400000	18700000	20700000	20100000	22700000	C02572	--
pmn001695	371.1	249.06	372.106	C16H20O10	[M-H]-	Trihydroxycinnamoylquinic acid	Phenolic acids	Phenolic acids	-	A	11900000	13800000	12200000	17300000	13800000	12600000	12400000	12300000	12000000	13400000	11900000	12500000	12100000	10700000	9970000	12000000	12200000	12300000	14000000	11400000	11500000	10800000	12100000	12200000	14000000	14000000	13800000	--	--
mws0055	373.13	343	372.121	C20H20O7	[M+H]+	Tangeretin	Flavonoids	Flavonols	481-53-8	B	70900	85300	85600	96100	64700	128000	137000	126000	88600	55400	41700	57200	14600	18000	25700	46700	29000	39000	23400	22700	21300	24600	23000	25000	66300	62200	59600	C10190	--
pmb0064	374.11	198.08	373.101	C15H19NO10	[M+H]+	DIMBOA glucoside	Alkaloids	Alkaloids	18607-79-9	B	226000	145000	134000	270000	382000	255000	212000	163000	102000	176000	198000	194000	170000	184000	249000	405000	278000	285000	167000	201000	200000	334000	286000	326000	250000	229000	234000	C04831	ko00402
pmb0108	375.2	137.1	374.1	C19H18O8	[M+H]+	Feruloyl syringic acid	Phenolic acids	Phenolic acids	-	B	128000	158000	151000	103000	94400	120000	150000	149000	135000	86400	72100	72100	139000	136000	117000	112000	110000	106000	170000	129000	155000	107000	92800	110000	125000	118000	134000	--	--
mws0232	377.15	243	376.138	C17H20N4O6	[M+H]+	Riboflavin	Others	Vitamin	83-88-5	A	653000	925000	1100000	444000	672000	508000	730000	582000	821000	605000	726000	607000	1110000	1620000	1060000	847000	1360000	959000	1230000	1770000	1750000	1240000	845000	1280000	1040000	980000	1020000	C00255	ko00740,ko01100,ko01110,ko02010
pme3337	384.12	252	383.108	C14H17N5O8	[M+H]+	N6-Succinyl Adenosine	Nucleotides and derivatives	Nucleotides and derivatives	4542-23-8	B	109000	78700	79000	636000	1700000	1170000	74300	94200	113000	214000	344000	596000	97500	87600	154000	191000	184000	99000	51400	90700	111000	105000	183000	172000	306000	286000	273000	--	--
pmb2940	385.11	205	386.121	C17H22O10	[M-H]-	1-O-β-D-Glucopyranosyl sinapate	Phenolic acids	Phenolic acids	78185-48-5	A	3160000	2530000	3860000	1010000	1020000	836000	2950000	2080000	1930000	1510000	2070000	1620000	4890000	5340000	242000	2440000	2010000	2390000	7130000	4710000	5410000	3920000	2410000	3580000	2590000	2950000	2730000	--	--
Zmhn002513	385.11	223.06	386.121	C17H22O10	[M-H]-	Isosinapic acid-hexoside	Phenolic acids	Phenolic acids	-	B	334000	338000	532000	260000	198000	167000	360000	329000	244000	198000	304000	260000	559000	617000	65700	397000	340000	297000	792000	566000	561000	509000	371000	545000	379000	389000	408000	--	--
pmb0489	397.2	147.04	396.19	C19H28N2O7	[M+H]+	N-hexosyl-p-coumaroyl putrescine	Alkaloids	Phenolamine	-	B	43700	53300	60200	30200	40600	41700	62600	32500	21600	143000	96300	98700	87800	50600	30000	138000	82300	162000	44900	38500	35100	32700	30600	36200	67900	57600	64400	--	--
pme2735	399.2	250	398.137	C15H22N6O5S	[M+H]+	S-Adenosylmethionine	Amino acids and derivatives	Amino acids and derivatives	29908-03-0	B	121000	99500	145000	904000	809000	467000	184000	118000	135000	332000	438000	437000	111000	182000	96300	341000	371000	375000	233000	81500	119000	461000	421000	420000	211000	265000	338000	C00019	ko00261,ko00270,ko00330,ko00908,ko01100,ko01110,ko01230,ko04122
Wmxn005068	398.11	194.05	399.11	C17H21NO10	[M-H]-	HMBOA-Acetyl glucoside	Alkaloids	Alkaloids	-	A	14500000	12700000	5450000	21600000	28000000	19900000	11800000	13100000	11300000	20800000	17900000	18200000	1850000	2210000	3860000	17000000	16600000	22800000	2290000	3140000	2530000	16500000	19300000	13800000	17600000	16500000	15100000	--	--
Lmhn002573	399.09	205.04	400.101	C17H20O11	[M-H]-	Sinapoylglucuronic acid	Phenolic acids	Phenolic acids	-	A	550000	488000	529000	464000	494000	452000	447000	533000	496000	316000	359000	267000	266000	218000	257000	251000	193000	282000	254000	249000	222000	220000	229000	204000	440000	366000	339000	--	--
pmb0681	403.1	367	402.095	C20H18O9	[M+H]+	Apigenin 8-C-pentoside	Flavonoids	Flavonoid	-	B	17700	12300	13800	36000	25800	23200	27900	18000	12700	9250	25700	7650	18100	17400	12400	11400	23300	24300	19000	14900	29600	26000	19000	25900	28800	21500	16800	--	--
pmb3031	403.1	313.1	404.111	C20H20O9	[M-H]-	Tricin O-glycerol	Flavonoids	Flavonoid	-	A	1010000	1140000	864000	841000	891000	926000	959000	1100000	1030000	568000	454000	561000	973000	1150000	2670000	730000	661000	592000	1370000	1160000	1160000	611000	579000	557000	1050000	1030000	1060000	--	--
pmn001399	405.12	243.1	406.126	C20H22O9	[M-H]-	2,4,6,4'-Tetrahydroxy-stilbene-2-O-D-glucopyranoside	Others	Stilbene	-	B	247000	265000	166000	1120000	460000	537000	345000	198000	244000	740000	874000	599000	109000	151000	86600	537000	807000	592000	183000	193000	186000	880000	696000	651000	542000	479000	447000	--	--
pmb0500	411.19	177.05	410.184	C23H26N2O5	[M+H]+	N-p-Coumaroyl-N'-feruloylputrescine	Alkaloids	Phenolamine	380302-96-5	B	8880	6640	3770	9	36100	5570	49300	47900	8110	12400	43600	8400	3830	6930	12800	29400	25900	20100	4140	6910	9	71000	49500	57600	25000	27300	28300	--	--
pmd0153	409.24	153	410.243	C19H39O7P	[M-H]-	LysoPA 16:0	Lipids	Glycerol ester	22002-85-3	B	7910	9400	7870	17100	15100	14000	10400	11700	13900	14900	10600	13700	6310	7880	18000	13700	11100	11700	9	9	9	16800	9540	10000	14800	12600	16200	C04036	--
Hmcp006520	413.36	395.35	412.355	C25H48O4	[M+H]+	1,3-Dihydroxypropan-2-yl 12-methyl-6-(6-methylheptyl)tridec-12-enoate	Others	Others	-	B	9210	8030	6640	5170	3650	2800	8540	10200	7910	9	9	9	5340	6580	3640	4570	4740	4820	9410	7230	9020	5210	5010	4380	11100	6450	6670	--	--
pmn001319	413.12	398.1	414.131	C22H22O8	[M-H]-	1-O-Feruloyl-3-O-p-Coumaroyl glycerol	Phenolic acids	Phenolic acids	-	A	2600	1590	5500	1880	22900	1560	9200	48500	7240	9	9	8040	883	1130	9840	5990	3400	1570	3570	6070	9	18000	6440	5560	8550	7950	7490	--	--
Lmhn001773	416.06	179.03	415.054	C19H13NO10	[M-H]-	Caffeoylnicotinoyltartaric acid	Phenolic acids	Phenolic acids	-	B	75900	106000	138000	16600	9	29200	117000	99400	94000	37900	22400	57900	209000	114000	107000	85900	85600	106000	171000	112000	114000	63700	55400	52100	130000	105000	126000	--	--
Hmcn002743	417.15	181.04	418.162	C22H26O8	[M-H]-	Lirioresinol-A	Lignans and Coumarins	Lignans	21453-71-4	B	19200	38700	19000	7900	17400	11800	32800	30500	10100	13100	15600	31100	14100	17700	66000	23500	27300	12300	36000	13600	11000	34500	25600	16300	29000	23300	21400	--	--
mws2523	421.08	241.1	422.083	C12H23O14P	[M-H]-	Trehalose 6-phosphate	Others	Saccharides and Alcohols	4484-88-2	B	34000	34600	32600	21500	18800	21800	25800	27900	26600	69200	84000	61100	47600	42500	33900	54100	58200	52500	37600	34700	23500	69100	41500	58200	42000	51300	47800	C00689	ko00500,ko01100,ko01110
pmb0864	426.26	285.24	425.254	C19H40NO7P	[M+H]+	LysoPE 14:0	Lipids	LPE	-	A	18500	22000	20000	50800	39600	40600	19000	21800	19000	39800	45600	42100	9850	15900	30200	43900	41500	47300	19600	16100	18600	28900	28700	30300	30000	26400	30400	--	--
pme2117	426	159	427.029	C10H15N5O10P2	[M-H]-	Adenosine 5'-Diphosphate	Nucleotides and derivatives	Nucleotides and derivatives	58-64-0	B	17100	39000	33500	32000	27300	35200	26200	35000	33400	38400	37400	37000	8730	36800	3520	43100	54500	49800	29800	35300	45000	57400	61300	53600	34800	40700	30600	C00008	ko00190,ko00195,ko00230,ko00908,ko01100,ko01110
Lmlp003201	433.11	283.06	432.105	C21H20O10	[M+H]+	5,7,4'-Trihydroxy-8-C-β-D-glucopyranosylflavone	Flavonoids	Flavonoid carbonoside	-	A	20400000	12600000	28100000	12700000	9680000	10100000	15100000	11500000	12900000	11800000	11200000	10700000	20000000	23500000	18400000	17000000	16100000	16200000	26500000	23300000	25100000	20200000	19700000	16900000	21000000	17600000	18000000	--	--
mws0048	431.1	311	432.106	C21H20O10	[M-H]-	Apigenin-8-C-Glucoside (Vitexin)	Flavonoids	Flavonoid carbonoside	3681-93-4	A	29200000	17800000	40600000	11400000	10400000	10100000	19100000	13500000	14900000	12000000	12800000	12300000	32500000	35800000	33500000	20800000	23200000	22900000	42400000	36400000	36900000	28900000	26700000	25400000	32600000	23900000	26800000	C01460	ko00941,ko00944
mws0072	433.11	271.01	432.106	C21H20O10	[M+H]+	Apigenin 5-O-glucoside	Flavonoids	Flavonoid	28757-27-9	B	1040000	587000	1480000	591000	484000	541000	882000	576000	643000	608000	576000	518000	1070000	1360000	863000	879000	875000	997000	1650000	1350000	1350000	1260000	1010000	981000	1130000	1050000	912000	--	--
pmp000413	433.11	283.06	432.106	C21H20O10	[M+H]+	Genistein 8-C-glucoside	Flavonoids	Flavonoid carbonoside	66026-80-0	A	2080000	854000	2340000	1080000	1000000	630000	1410000	753000	907000	761000	910000	612000	1520000	1580000	1120000	1300000	1640000	1860000	1930000	2030000	2180000	1660000	1720000	1760000	1390000	1420000	1300000	C10420	--
mws1434	431.1	311	432.106	C21H20O10	[M-H]-	Apigenin-6-C-glucoside (Isovitexin)	Flavonoids	Flavonoid carbonoside	29702-25-8	A	26900000	16900000	42500000	10600000	9430000	10000000	19600000	14200000	15600000	11600000	11500000	10800000	33200000	37100000	33700000	20700000	22400000	22800000	37900000	34500000	37200000	30800000	26700000	24200000	31400000	24800000	25500000	C01714	ko00944
Lmdp003577	433.11	271.06	432.106	C21H20O10	[M+H]+	Genistin(Genistein 7-O-Glucoside)	Flavonoids	Isoflavones	-	A	502000	348000	996000	62400	93900	65500	416000	200000	256000	160000	176000	210000	574000	791000	186000	416000	330000	360000	1160000	798000	808000	410000	348000	345000	530000	493000	424000	C09126	ko00943
pmp000117	433.15	418.1	432.142	C22H24O9	[M+H]+	3,5,6,7,8,3',4'-Heptamethoxyflavone	Flavonoids	Flavonols	1178-24-1	A	24000	33600	30100	31200	22400	19900	51600	46700	28000	19900	15800	19600	1320	3320	1850	8020	3430	3230	4340	2560	2040	2610	1700	1990	20700	16700	15900	--	--
pmb0744	435.11	331.08	434.1	C24H18O8	[M+H]+	Tricin O-phenylformic acid	Flavonoids	Flavonoid	-	B	74600	82300	56100	16600	10200	13700	77000	82100	74700	10400	7520	9750	50900	82600	50000	16400	12500	13700	79900	72700	63500	12400	9050	10100	56300	46700	42700	--	--
Zmhn003534	433.11	271.06	434.121	C21H22O10	[M-H]-	Naringenin-O-glucoside	Flavonoids	Flavonoid	-	A	154000	106000	237000	27400	17200	6130	132000	80200	95600	32100	42800	40800	217000	209000	47700	54400	30900	50700	367000	192000	204000	29100	40800	41400	126000	83300	112000	--	--
mws1179	433.11	271	434.121	C21H22O10	[M-H]-	Naringenin-7-O-glucoside	Flavonoids	Dihydroflavone	529-55-5	A	86400	72100	174000	13700	14200	14100	70900	46800	50300	33100	27100	29300	147000	146000	13600	40300	25400	34700	238000	130000	143000	28300	22100	28700	80000	67500	76100	--	--
pmb0503	439.22	147.04	438.211	C20H30N4O7	[M+H]+	N-(4'-O-glycosyl)-p-coumaroyl agmatine	Alkaloids	Phenolamine	-	B	121000	156000	136000	33400	24300	29300	176000	169000	55600	44900	31200	48400	46100	23400	14500	92200	37400	47800	55800	20200	42400	9280	18900	41400	82200	73400	83600	--	--
pmp000091	445.15	177.05	444.142	C23H24O9	[M+H]+	Glyceryl 1,3-diferulate	Phenolic acids	Phenolic acids	83008-46-2	A	207000	145000	191000	22900	101000	10000	375000	566000	86800	37000	21300	23100	69200	316000	363000	123000	90600	56500	199000	281000	252000	304000	298000	258000	251000	167000	197000	--	--
pme1014	445.3	341.3	444.303	C31H40O2	[M+H]+	Menaquinone (K2)	Others	Vitamin	11032-49-8	B	33500	40200	39600	31400	32900	28100	33100	26600	32000	24400	25900	21900	26200	24900	255000	29700	34000	40500	26700	32900	27400	21100	31800	28800	354000	555000	545000	C00828	ko00130,ko01100,ko01110
pmb1283	448.1	163.5	447.215	C18H33N5O6S	[M+H]+	L-Glutaminyl-L-valyl-L-valyl-L-cysteine	Amino acids and derivatives	Amino acids and derivatives	-	B	233000	144000	120000	151000	91100	106000	198000	182000	235000	64100	92700	81700	40600	48700	22700	48000	42600	33300	63100	51400	64200	30400	43600	50500	106000	107000	93100	--	--
Hmpp003270	449.1	287.05	448.091	C21H20O11	[M+H]+	Luteolin-4'-O-β-D-glucoside	Flavonoids	Flavonoid	6920-38-3	B	227000	289000	245000	68000	60600	108000	158000	222000	233000	167000	145000	164000	166000	169000	46800	114000	75400	98900	271000	179000	159000	93600	123000	105000	224000	208000	198000	--	--
mws1299	449.11	299.2	448.101	C21H20O11	[M+H]+	Luteolin-8-C-Glucoside (Orientin)	Flavonoids	Flavonoid carbonoside	28608-75-5	A	239000	301000	256000	260000	179000	204000	270000	277000	254000	257000	269000	229000	140000	122000	114000	150000	125000	133000	179000	153000	151000	151000	125000	147000	264000	245000	194000	C10114	--
mws0913	447.09	285	448.101	C21H20O11	[M-H]-	Kaempferol-3-O-galactoside (Trifolin)	Flavonoids	Flavonols	23627-87-4	B	1590000	2190000	2050000	689000	368000	567000	1270000	1330000	1420000	1700000	1320000	1170000	1550000	1560000	282000	952000	982000	1690000	3450000	2020000	1790000	1570000	1220000	1410000	2070000	1290000	1420000	C12626	ko00944
mws2209	449.11	287.06	448.101	C21H20O11	[M+H]+	Kaempferol-3-O-glucoside (Astragalin)	Flavonoids	Flavonols	480-10-4	B	235000	243000	221000	102000	53000	93800	228000	230000	221000	165000	178000	177000	189000	144000	59000	114000	98300	117000	256000	156000	149000	146000	111000	82200	205000	150000	184000	C12249	ko00944,ko01110
Lmlp003531	449.11	287.06	448.101	C21H20O11	[M+H]+	Luteolin-3'-O-β-D-glucoside	Flavonoids	Flavonoid	5154-41-6	B	258000	208000	203000	85800	63600	89300	208000	243000	286000	166000	120000	143000	179000	150000	52700	123000	95900	106000	276000	156000	154000	143000	121000	80200	204000	196000	182000	--	--
mws1608	447.09	357.1	448.101	C21H20O11	[M-H]-	Luteolin-6-C-glucoside (Isoorientin)	Flavonoids	Flavonoid carbonoside	4261-42-1	A	355000	377000	328000	222000	219000	203000	253000	273000	262000	258000	246000	267000	216000	168000	142000	147000	130000	185000	277000	245000	192000	199000	161000	159000	329000	243000	297000	C01821	--
mws0057	451.12	289	450.116	C21H22O11	[M+H]+	Eriodictyol 7-O-glucoside	Flavonoids	Dihydroflavone	38965-51-4	B	193000	162000	196000	157000	96000	151000	177000	185000	166000	173000	174000	178000	98700	111000	47700	100000	101000	98500	121000	121000	125000	101000	118000	96200	155000	142000	161000	--	--
pmp000308	453.18	291.13	452.168	C22H28O10	[M+H]+	4'-O-β-D-Glucosyl-5-O-methylvisamminol	Others	Others	84272-85-5	B	22300	20200	14100	20500	13800	14500	25800	22400	27600	13300	10700	13400	10100	8900	3930	8000	8600	6330	10300	12000	9740	9710	4490	7180	18700	9900	18600	--	--
pmb0876	454.29	313.27	453.286	C21H44NO7P	[M+H]+	LysoPE 16:0	Lipids	LPE	53862-35-4	A	1170000	1810000	1530000	1900000	1850000	1810000	1610000	1500000	1610000	1630000	1860000	1990000	471000	1450000	3620000	1600000	1380000	1750000	1580000	1550000	1470000	1450000	1090000	1110000	1980000	1620000	1670000	--	--
pmp001277	454.29	313.28	453.286	C21H44NO7P	[M+H]+	3-{(2-Aminoethoxy)(hydroxy)phosphoryl]oxy}-2-hydroxypropyl palmitate	Alkaloids	Alkaloids	-	A	1130000	1860000	1500000	1810000	1870000	1930000	1520000	1530000	1750000	1620000	1790000	2010000	488000	1440000	4000000	1590000	1490000	1820000	1420000	1690000	1450000	1370000	1130000	1100000	1880000	1810000	1660000	--	--
pmb0464	458.1	116.3	457.143	C16H27NO14	[M+H]+	Aspartic acid di-O-glucoside	Amino acids and derivatives	Amino acids and derivatives	-	B	354000	593000	525000	347000	220000	205000	364000	314000	328000	2490000	3660000	2300000	272000	312000	266000	884000	1690000	968000	361000	250000	419000	1100000	626000	473000	1370000	941000	959000	--	--
pmb2654	460.1	117.9	461.153	C19H27NO12	[M-H]-	Anthranilate O-hexosyl-O-hexoside	Phenolic acids	Phenolic acids	-	B	3140000	3260000	4070000	622000	515000	682000	2170000	1490000	1410000	1990000	2540000	925000	3520000	3290000	2260000	2730000	3800000	3910000	2800000	2420000	2030000	7290000	1770000	2850000	2840000	2370000	2680000	--	--
pmp000579	463.12	301.07	462.116	C22H22O11	[M+H]+	Diosmetin-7-O-galactoside	Flavonoids	Flavonoid	-	A	4060000	4710000	4200000	2400000	1630000	2190000	4180000	3990000	3730000	3500000	2990000	3090000	3420000	3660000	1200000	2470000	2080000	2530000	5200000	3790000	3810000	2790000	2230000	2420000	4310000	3680000	3400000	--	--
pmp000120	463.12	427.1	462.116	C22H22O11	[M+H]+	Diosmetin-6-C-glucoside	Flavonoids	Flavonoid	-	A	10300000	11500000	9110000	14400000	11700000	12300000	10400000	10500000	10900000	13100000	11200000	11900000	3970000	4530000	3460000	5940000	5350000	6510000	6030000	4970000	5410000	6160000	6240000	6280000	11900000	9370000	10300000	--	--
Lmnp002845	463.13	343.09	462.116	C22H22O11	[M+H]+	5,7,4'-Trihydroxy-6-methoxyflavone-8-C-β-D-glucoside	Flavonoids	Flavonoid carbonoside	-	A	24700000	23700000	19700000	29700000	23600000	25900000	21800000	23500000	22200000	25300000	25600000	23100000	9280000	10200000	7670000	13400000	11500000	13600000	12400000	11900000	10500000	15200000	15000000	13700000	23900000	20600000	20600000	--	--
pmb0629	463.12	313.1	462.116	C22H22O11	[M+H]+	Chrysoeriol-6-C-hexoside	Flavonoids	Flavonoid	-	B	306000	453000	455000	321000	53500	9	428000	322000	378000	430000	433000	413000	347000	232000	143000	227000	216000	334000	728000	308000	269000	256000	208000	221000	464000	416000	372000	--	--
Zmhn003191	461.11	341.06	462.116	C22H22O11	[M-H]-	Isoscoparin	Flavonoids	Flavonoid	20013-23-4	A	11200000	12000000	8860000	11500000	10900000	11600000	10400000	10400000	9920000	12200000	11900000	10500000	3880000	4650000	3990000	5310000	4640000	5570000	5370000	4890000	5820000	5820000	6610000	5770000	11300000	8880000	10200000	C05990	--
Hmdn001667	463.05	300.99	464.06	C20H16O13	[M-H]-	Ellagicacid-4-O-β-D-galloyl-β-Dglucopyranoside	Tannins	Tannin	-	B	309000	339000	399000	61700	9	9	385000	260000	300000	290000	318000	352000	302000	165000	141000	165000	162000	231000	742000	243000	228000	201000	129000	187000	303000	299000	280000	--	--
mws0061	463.09	300	464.095	C21H20O12	[M-H]-	Quercetin-3-O-β-D-Galactoside (Hyperin)	Flavonoids	Flavonols	482-36-0	B	1000000	1110000	998000	1140000	970000	1020000	840000	913000	940000	1040000	914000	950000	426000	479000	373000	451000	428000	538000	537000	510000	549000	458000	563000	605000	908000	819000	911000	C10073	--
pmp001309	465.1	303.1	464.095	C21H20O12	[M+H]+	6-Hydroxykaempferol-7-O-glucoside	Flavonoids	Flavonols	-	B	99100	114000	93300	78300	88200	79900	87200	90500	98100	66900	56900	68900	88100	73800	49600	64200	42500	60200	88200	75600	87000	43400	63400	46000	82200	84600	84400	--	--
pmd0130	468.31	184.07	467.301	C22H46NO7P	[M+H]+	LysoPC 14:0	Lipids	LPC	-	A	7610	6140	4660	19500	26800	21500	5220	4760	8610	11200	13600	6190	9860	10500	14000	16700	13300	12100	7100	12800	7280	10100	10600	16200	13300	12800	10900	--	--
pmb1912	474.17	327	473.166	C20H23N7O7	[M+H]+	10-Formyl-THF	Alkaloids	Alkaloids	2800-34-2	A	841000	788000	719000	1300000	1590000	1380000	635000	767000	762000	854000	832000	768000	724000	821000	977000	1120000	1000000	1010000	795000	978000	821000	903000	1120000	1410000	1160000	923000	1190000	C00234	ko00670,ko00970,ko01100,ko01200
pmp000172	477.14	315.08	476.132	C23H24O11	[M+H]+	5,2'-Dihydroxy-7,8-dimethoxyflavone glycosides	Flavonoids	Flavonoid	-	A	15300	23700	14900	7030	5650	7030	20500	18800	16500	6190	8270	12400	9	9	9	9	9	9	9	9	9	9	9	9	12300	7870	5130	--	--
pmb0874	478.29	337.27	477.286	C23H44NO7P	[M+H]+	LysoPE 18:2	Lipids	LPE	-	A	18900000	18600000	14900000	9100000	10300000	9480000	16200000	14100000	19300000	7170000	7890000	3910000	8610000	29800000	14900000	9480000	6250000	9250000	25400000	36200000	27300000	14500000	8210000	8640000	19400000	17200000	16000000	--	--
pma0214	479	317.1	478	C22H22O12	[M+H]+	Methylquercetin O-hexoside	Flavonoids	Flavonols	-	B	97700	132000	110000	53800	40400	38100	120000	102000	92300	78500	78100	79700	144000	146000	50800	106000	95800	107000	194000	172000	159000	107000	102000	117000	120000	110000	107000	--	--
Hmpp003242	479.11	317.06	478.101	C22H22O12	[M+H]+	Isorhamnetin-3-O-glucoside	Flavonoids	Flavonols	-	A	137000	133000	88600	109000	72200	62700	121000	115000	102000	92000	79000	83200	83600	89300	76600	58000	53300	60100	109000	92000	101000	59500	47200	58200	122000	96700	87400	--	--
Hmcp002207	479.12	317.06	478.111	C22H22O12	[M+H]+	Isorhamnetin-7-O-glucoside	Flavonoids	Flavonols	-	A	126000	143000	86900	75600	79400	84300	114000	124000	105000	84200	59200	82200	80700	71500	86500	66800	61600	55000	102000	86500	90100	63700	49600	59200	119000	90100	89600	--	--
pma6640	479.3	317.1	478.118	C22H22O12	[M+H]+	Selgin 7-O-hexoside	Flavonoids	Flavonoid	-	B	54100	70000	80000	28000	30600	30400	55500	59600	50900	48900	47200	46700	98500	101000	33800	53800	61700	63000	139000	99700	86700	75700	83200	61000	84200	57300	53900	--	--
pmn001525	477.14	169	478.148	C23H26O11	[M-H]-	3,5-Di-O-galloylshikimic acid	Phenolic acids	Phenolic acids	95753-52-9	B	27000	22600	9980	21000	20700	25200	23000	19900	21100	15500	12800	9550	14300	11100	12400	18600	14400	18200	18900	17900	18400	10400	15500	19400	30100	14600	17800	--	--
pmb2260	480.31	184.07	479.301	C23H46NO7P	[M+H]+	LysoPC 15:1	Lipids	LPC	-	B	38700	30900	28600	16300	12400	18000	34100	38000	39800	11100	12900	11000	33700	22500	87700	14400	9500	9720	21200	20300	23200	6120	10200	10700	29300	29600	25400	--	--
pmp001280	480.31	339.29	479.301	C23H46NO7P	[M+H]+	3-{[(2-Aminoethoxy)(hydroxy)phosphoryl]oxy}-2-hydroxypropyl-9,12-octadecenoate	Alkaloids	Alkaloids	-	A	30900	49800	26400	51800	72300	68600	37700	38400	39400	33200	37300	43900	8810	86800	102000	60900	37200	76000	56200	83900	53300	37400	31800	49200	54100	29300	59500	--	--
mws0289	480.31	339.29	479.301	C23H46NO7P	[M+H]+	LysoPE 18:1	Lipids	LPE	89576-29-4	A	49400	34400	33500	60000	61400	56800	37600	43000	33100	42200	34400	49000	16900	89600	112000	99500	53600	77200	41200	130000	66700	114000	43100	50000	39300	40600	51900	--	--
pmb2319	482.32	184.07	481.317	C23H48NO7P	[M+H]+	LysoPC 15:0	Lipids	LPC	-	A	3730	4220	4140	27700	12100	14900	862	5680	4330	9310	12300	6470	1370	3120	7350	8720	6640	7550	3540	1990	2430	8600	6520	6200	9200	6610	8320	--	--
pmb3066	481.14	319.2	482.142	C22H26O12	[M-H]-	5-O-p-Coumaroyl shikimic acid O-hexoside	Phenolic acids	Phenolic acids	-	B	49900	55300	39100	58000	46700	49900	35800	38700	42200	45100	47500	55400	44200	50700	42200	67000	69700	56100	50200	53900	57700	85500	71200	56500	73900	61000	52500	--	--
Zmhn003565	489.1	285.04	490.111	C23H22O12	[M-H]-	Kaempferol-3-O-(6''-acetyl)-glucoside	Flavonoids	Flavonols	-	B	18900	7000	6440	86100	74500	117000	16100	12900	16400	152000	112000	128000	12100	14600	12500	102000	97900	111000	12300	15600	16300	118000	153000	113000	84300	78800	83600	--	--
pmb0863	492.31	184.07	491.301	C24H46NO7P	[M+H]+	LysoPC 16:2	Lipids	LPC	-	A	28900	29800	25300	25100	45800	33300	25600	25700	31700	9960	13400	6660	11800	34900	17500	18100	10200	6920	24700	58500	31600	13700	11900	21100	23200	20600	22300	--	--
pmb0736	493.13	331	492.127	C23H24O12	[M+H]+	Tricin 7-O-Glucoside	Flavonoids	Flavonoid	32769-01-0	A	216000	256000	211000	185000	177000	177000	205000	193000	184000	212000	179000	184000	165000	213000	89700	209000	171000	204000	196000	200000	194000	207000	192000	183000	236000	210000	198000	--	--
pmp001270	494.32	184.07	493.317	C24H48NO7P	[M+H]+	LysoPC 16:1	Lipids	LPC	-	A	216000	207000	180000	207000	296000	206000	166000	140000	230000	62200	108000	49000	115000	212000	123000	97600	58300	147000	166000	361000	219000	152000	108000	171000	199000	171000	148000	--	--
pmb0855	496.34	184.07	495.332	C24H50NO7P	[M+H]+	LysoPC 16:0	Lipids	LPC	17364-16-8	A	6660000	10500000	8310000	12100000	10800000	9800000	8920000	9750000	9290000	8660000	9950000	8800000	5010000	8180000	17800000	7950000	7970000	7070000	8410000	8520000	9920000	7370000	7850000	6230000	11000000	9400000	8570000	--	--
pmb0745	497.14	331.3	496.137	C26H24O10	[M+H]+	Tricin 4'-O-syringyl alcohol	Flavonoids	Flavonoid	-	A	897000	932000	574000	618000	734000	707000	736000	979000	744000	467000	320000	374000	483000	632000	919000	429000	369000	300000	680000	555000	507000	404000	305000	307000	854000	728000	671000	--	--
pmb3061	499.15	163.1	500.153	C22H28O13	[M-H]-	5-O-p-Coumaroyl quinic acid O-hexoside	Phenolic acids	Phenolic acids	-	A	11500	15400	19000	8230	2780	4560	10400	8020	13000	19500	13900	15500	185000	98600	63500	108000	125000	142000	270000	133000	93500	101000	92400	75000	78500	74700	79000	--	--
pme0500	503.16	323	504.169	C18H32O16	[M-H]-	D-(+)-Melezitose	Others	Saccharides and Alcohols	597-12-6	A	866000	775000	1490000	69400	33900	40100	640000	453000	485000	301000	356000	196000	1360000	1530000	2090000	190000	320000	307000	1050000	604000	758000	688000	181000	115000	716000	668000	690000	--	--
mws1589	503.16	179	504.169	C18H32O16	[M-H]-	Panose	Others	Saccharides and Alcohols	33401-87-5	A	478000	472000	690000	54100	49800	37400	370000	242000	241000	285000	245000	171000	487000	616000	754000	132000	226000	296000	546000	285000	477000	410000	149000	136000	306000	337000	394000	C00713	--
pmb0602	509.3	347.2	508.3	C23H24O13	[M+H]+	Syringetin 7-O-hexoside	Flavonoids	Flavonoid	-	B	33600	35000	20500	36600	27600	24400	35800	35700	27300	36700	25500	27800	25700	17400	22400	20900	24100	31300	23900	18200	21900	29100	29000	21300	32100	28000	28900	--	--
pmb1466	511.12	331.1	510.116	C26H22O11	[M+H]+	Tricin 4'-O-syringic acid	Flavonoids	Flavonoid	-	B	47500	40200	32300	6830	6830	5970	36800	45400	36300	6800	5860	5190	41300	57900	58000	8670	5860	8800	47900	56900	41600	6700	5050	6290	34800	33400	27800	--	--
Hmqp006235	516.3	184.07	515.297	C21H46N3O9P	[M+H]+	LysoPC 18:4	Lipids	LPC	-	A	18000	19800	20800	20100	24900	22200	19300	22700	28600	11200	14800	4980	9410	24900	10800	11100	6720	11400	15200	46200	20600	16400	11800	15700	20600	18000	18300	--	--
pmp001279	518.32	459.25	517.313	C21H48N3O9P	[M+H]+	Bis(N,N-diethylethanaminium)-2-acetamido-1,5-anhydro-2-deoxy-1-[-hydroxy(phosphonato)methyl]-D-glucitol	Alkaloids	Alkaloids	-	A	239000	348000	348000	369000	357000	394000	320000	354000	327000	344000	360000	334000	180000	297000	577000	318000	275000	299000	370000	316000	326000	321000	271000	269000	498000	380000	376000	--	--
pmb0854	518.32	184.07	517.317	C26H48NO7P	[M+H]+	LysoPC 18:3	Lipids	LPC	-	A	408000	497000	424000	432000	488000	437000	456000	420000	526000	199000	318000	130000	178000	720000	201000	270000	182000	231000	572000	1010000	694000	352000	233000	287000	472000	438000	413000	--	--
pmp000194	519.11	271.05	518.106	C24H22O13	[M+H]+	Malonyglygenistin	Flavonoids	Isoflavones	-	A	24900	18000	10100	44400	86600	56300	14100	14100	9680	51900	54300	29500	9	9	6720	22600	28700	50700	5160	6960	9	19000	29200	25700	28900	27900	24600	--	--
pmp001273	520.34	184.07	519.332	C26H50NO7P	[M+H]+	LysoPC 18:2	Lipids	LPC	-	A	521000	523000	443000	137000	209000	205000	412000	402000	518000	85700	107000	53100	338000	990000	421000	165000	108000	145000	685000	1070000	710000	174000	125000	187000	495000	448000	415000	--	--
Rfmb25703	519.19	357.13	520.194	C26H32O11	[M-H]-	Pinoresinol-Hexose	Lignans and Coumarins	Lignans	-	B	282000	244000	238000	96400	108000	135000	218000	240000	229000	107000	99600	96900	152000	154000	171000	148000	105000	108000	179000	169000	169000	98700	97300	135000	214000	177000	192000	--	--
pmp001281	522.36	184.07	521.348	C26H52NO7P	[M+H]+	LysoPC 18:1	Lipids	LPC	-	A	9540000	8460000	6540000	4370000	8560000	6280000	5900000	5380000	7370000	2840000	3430000	2160000	6930000	18100000	12500000	12100000	5930000	8300000	10900000	20500000	15700000	13300000	6790000	10300000	9880000	9170000	8660000	--	--
pmb3041	521.09	329.2	522.101	C23H22O14	[M-H]-	Tricin O-saccharic acid	Flavonoids	Flavonoid	-	A	96800	84100	87800	62500	81000	82700	66000	81200	73700	64500	60400	61700	78800	106000	92100	130000	144000	105000	103000	89100	91600	104000	128000	138000	123000	102000	114000	--	--
pmn001710	521.13	359.08	522.137	C24H26O13	[M-H]-	Rosmarinyl Glucoside	Phenolic acids	Phenolic acids	-	B	146000	95100	108000	154000	119000	131000	84500	92500	70600	195000	258000	262000	94800	85000	94500	166000	187000	171000	121000	71600	104000	231000	238000	165000	207000	156000	165000	--	--
mws0126	524.37	184.07	523.364	C26H54NO7P	[M+H]+	LysoPC 18:0	Lipids	LPC	19420-57-6	A	81600	112000	127000	201000	207000	212000	95900	107000	92800	147000	168000	202000	62600	127000	415000	228000	215000	167000	91300	119000	131000	132000	145000	146000	149000	145000	138000	--	--
pmb3053	523.12	329.2	524.132	C27H24O11	[M-H]-	Tricin O-eudesmic acid	Flavonoids	Flavonoid	-	A	774000	804000	497000	374000	349000	387000	646000	776000	650000	228000	183000	214000	675000	863000	942000	494000	441000	387000	1030000	889000	813000	467000	389000	365000	807000	635000	680000	--	--
pmb0746	527.15	331	526.148	C27H26O11	[M+H]+	Tricin 4'-O-β-guaiacylglycerol	Flavonoids	Flavonoid	-	A	9060000	9340000	6680000	4930000	5860000	6380000	8490000	7920000	7180000	3810000	2830000	3670000	7530000	8710000	18200000	5750000	4960000	4370000	10500000	8080000	7540000	4930000	3590000	3550000	9810000	7930000	7380000	--	--
pmp000234	527.15	331.08	526.148	C27H26O11	[M+H]+	Salcolin A	Flavonoids	Flavonoid	-	B	8870000	9140000	6710000	4730000	5720000	6100000	8020000	8250000	7070000	3600000	2690000	3590000	7470000	8580000	17800000	5800000	5090000	4130000	10000000	7620000	7580000	4760000	3570000	3680000	9590000	8050000	7280000	--	--
pmp000235	527.15	331.08	526.148	C27H26O11	[M+H]+	Salcolin B	Flavonoids	Flavonoid	-	B	11200000	11500000	8550000	5800000	6520000	7190000	10300000	10100000	8830000	4580000	3420000	4390000	8810000	10900000	14500000	6710000	6150000	5420000	13100000	9830000	9680000	5790000	4440000	4530000	11800000	9710000	9050000	--	--
Hmln002483	533.1	489.11	534.101	C24H22O14	[M-H]-	Kaempferol-3-O-(6''-malonyl)-glucoside	Flavonoids	Flavonols	-	A	40700	14100	12100	211000	178000	193000	24600	31800	25000	331000	327000	293000	20700	23500	86300	304000	275000	349000	22500	21800	20300	428000	378000	287000	235000	175000	199000	--	--
pmb0654	535.14	481.1	534.137	C25H26O13	[M+H]+	Apigenin di-C,C-pentoside	Flavonoids	Flavonoid	-	A	808000	763000	739000	954000	768000	840000	747000	825000	673000	697000	639000	690000	1030000	1100000	737000	1010000	1140000	920000	1110000	1150000	1230000	1070000	997000	1020000	1060000	1060000	884000	--	--
pmp001274	542.32	483.25	541.317	C28H48NO7P	[M+H]+	2-Hydroxy-5,8,11,14,17-icosapentaenoyloxy]propyl-2-(trimethylammonio)ethyl phosphate	Alkaloids	Alkaloids	-	A	139000	309000	278000	129000	161000	198000	171000	298000	298000	124000	129000	134000	180000	822000	800000	192000	184000	233000	703000	999000	784000	171000	134000	172000	459000	372000	500000	--	--
pmp001282	544.34	485.27	543.333	C28H50NO7P	[M+H]+	Propyl2-(trimethylammonio)ethyl phosphate	Others	Others	-	A	9530	8400	15600	14500	19800	22200	16700	12900	11000	14000	9860	16100	15700	72500	60300	25800	22900	34000	42100	58300	41900	28600	22800	28200	30900	29500	27100	--	--
pmd0147	548.37	184.07	547.364	C28H54NO7P	[M+H]+	LysoPC 20:2	Lipids	LPC	-	B	59300	89300	75200	66900	72200	75400	75300	79400	80000	41600	40400	45400	42700	79900	267000	60000	50100	44000	79900	117000	94800	32000	45100	43300	74300	58500	66200	--	--
pmb0608	549.12	301.4	548.117	C25H24O14	[M+H]+	Chrysoeriol-O-malonylhexoside	Flavonoids	Flavonoid	-	A	268000	226000	202000	1540000	1310000	1160000	234000	230000	223000	1040000	1210000	998000	172000	228000	208000	993000	1050000	1010000	197000	204000	234000	1210000	1170000	994000	884000	723000	695000	--	--
pmp000588	549.12	463.12	548.117	C25H24O14	[M+H]+	Diosmetin-7-O-(6'-O-malonyl)-β-D-glucoside	Flavonoids	Flavonoid	-	A	39100	21500	30500	175000	140000	128000	23300	25300	25200	109000	121000	112000	18500	25500	27500	112000	112000	109000	22500	24400	23700	131000	120000	114000	91200	85100	80200	--	--
pmn001672	547.17	223.1	548.174	C23H32O15	[M-H]-	β-D-Furanofructosyl-α-D-(3-mustard acyl)glucoside	Phenolic acids	Phenolic acids	-	B	42800	52600	62400	62200	38000	38800	45800	48500	23000	40300	29800	48200	98900	95500	59300	109000	77900	95800	94500	55600	87900	83600	88900	81000	70700	69300	86500	--	--
pmb3032	561.12	329.1	562.132	C26H26O14	[M-H]-	Tricin O-malonyl rhamnoside	Flavonoids	Flavonoid	-	A	325000	302000	217000	154000	210000	188000	297000	268000	246000	140000	102000	144000	294000	322000	601000	208000	224000	170000	385000	314000	288000	194000	145000	164000	308000	268000	284000	--	--
Rfmb25702	561.2	357.13	562.205	C28H34O12	[M-H]-	Pinoresinol-acetylglucose	Lignans and Coumarins	Lignans	-	A	98000	84700	70300	156000	248000	281000	64300	95500	93000	176000	158000	151000	77700	69500	121000	168000	180000	125000	72500	70400	97200	164000	160000	241000	190000	133000	151000	--	--
pma0760	565	317	564	C25H24O15	[M+H]+	Selgin O-malonylhexoside	Flavonoids	Flavonoid	-	B	7860	7960	7020	10700	13800	12800	6030	9020	7310	10600	13800	9420	7260	7140	10700	15400	11400	11000	8300	9180	7640	14500	11900	16200	11900	13900	11200	--	--
mws1292	565.16	409.09	564.123	C26H28O14	[M+H]+	Isoschaftoside	Flavonoids	Flavonoid carbonoside	52012-29-0	A	17000000	13700000	16800000	14400000	13700000	13100000	13500000	13600000	13600000	14200000	13500000	13000000	17700000	20300000	14200000	16400000	17200000	16600000	19200000	19300000	19900000	15600000	17100000	17200000	17200000	16700000	16300000	--	--
pmb0652	565.1	433.3	564.123	C26H28O14	[M+H]+	C-Hexosyl-apigenin O-pentoside	Flavonoids	Flavonoid carbonoside	-	B	1710000	794000	2470000	869000	943000	738000	1330000	716000	822000	706000	760000	621000	2030000	2470000	1950000	1580000	1760000	1810000	2280000	2430000	2570000	1870000	1630000	1710000	1740000	1590000	1500000	--	--
mws1660	565.16	529.13	564.123	C26H28O14	[M+H]+	Schaftoside	Flavonoids	Flavonoid carbonoside	51938-32-0	A	285000	236000	293000	250000	241000	187000	235000	204000	202000	205000	194000	177000	351000	270000	221000	274000	303000	302000	318000	325000	317000	252000	280000	299000	298000	235000	296000	--	--
pmp000236	565.16	367.1	564.148	C26H28O14	[M+H]+	Apigenin-6-C-glucose-8-xylcose	Flavonoids	Flavonoid carbonoside	-	B	346000	187000	497000	214000	262000	165000	286000	166000	216000	177000	168000	181000	396000	513000	305000	307000	291000	415000	470000	473000	572000	307000	424000	405000	405000	264000	301000	--	--
pmb2922	565.05	323.1	566.055	C15H24N2O17P2	[M-H]-	Uridine 5'-diphospho-D-glucose	Nucleotides and derivatives	Nucleotides and derivatives	133-89-1	A	1120000	1230000	1080000	1040000	538000	1090000	1170000	1330000	1370000	1120000	1020000	1010000	1410000	1630000	110000	1370000	1020000	1040000	1730000	1840000	1760000	1770000	1260000	1540000	1370000	1200000	1250000	C00029	ko00040,ko00052,ko00053,ko00240,ko00500,ko00520,ko00561,ko00908,ko01100,ko01110
pmb0720	579.13	331.1	578.127	C26H26O15	[M+H]+	Tricin 7-O-(6''-O-Malonyl)-Beta-D-Glucoside	Flavonoids	Flavonoid	-	B	6130000	7920000	7100000	10700000	11900000	11200000	6410000	6080000	6510000	8010000	7920000	7550000	6840000	7590000	6270000	10900000	11200000	10200000	8180000	7770000	7300000	12300000	10500000	11500000	10700000	9160000	9120000	--	--
pme3227	579.17	433	578.164	C27H30O14	[M+H]+	Vitexin 2''-O-β-L-rhamnoside	Flavonoids	Flavonoid carbonoside	64820-99-1	A	15700000	7160000	19800000	7680000	9690000	7180000	13900000	6660000	6980000	6720000	6730000	5900000	14500000	15300000	14000000	13600000	15700000	13500000	16100000	15900000	18200000	14000000	12900000	13900000	15300000	12600000	11500000	C12628	ko00944
pmb0566	581.15	383.2	580.143	C26H28O15	[M+H]+	Luteolin-O-hexosyl-O-pentoside	Flavonoids	Flavonoid	-	A	36400	75800	56900	49000	27400	51200	69200	91300	57900	62900	44600	40000	32700	19600	12300	21100	14200	16800	51100	32900	23800	22200	27300	24300	57300	56400	38400	--	--
pmb0636	581.15	431.3	580.143	C26H28O15	[M+H]+	6-C-Hexosyl luteolin O-pentoside	Flavonoids	Flavonoid carbonoside	-	A	2860000	2810000	2570000	2810000	2170000	2530000	2730000	2980000	3070000	2570000	2440000	2520000	1760000	1850000	1130000	1520000	1630000	1720000	2010000	1850000	1820000	1670000	1560000	1510000	2710000	2290000	2180000	--	--
pmb0631	581.15	515.4	580.143	C26H28O15	[M+H]+	C-Hexosyl-luteolin C-pentoside	Flavonoids	Flavonoid carbonoside	-	A	5280000	5080000	4900000	5450000	3800000	4470000	5110000	5370000	4630000	4860000	4260000	4560000	2930000	2930000	2030000	2650000	2620000	3110000	3680000	3540000	3220000	2950000	3080000	2900000	4910000	4630000	4070000	--	--
Rfmb26203	579.21	417.16	580.216	C28H36O13	[M-H]-	Syringaresinol-Hex	Lignans and Coumarins	Lignans	-	A	506000	513000	454000	103000	100000	76000	399000	464000	266000	128000	115000	132000	597000	543000	364000	249000	192000	178000	628000	496000	495000	194000	192000	184000	417000	305000	302000	--	--
pmb0492	584.2	325	583.268	C34H37N3O6	[M+H]+	N',N'',N'''-p-Coumaroyl-cinnamoyl-caffeoyl spermidine	Alkaloids	Phenolamine	-	B	86200	31100	33100	194000	428000	304000	46400	48400	66500	139000	164000	186000	198000	88500	810000	176000	232000	151000	43900	102000	48600	118000	126000	195000	182000	181000	173000	--	--
pmb2936	591.17	367.2	592.179	C28H32O14	[M-H]-	Disinapoyl hexoside	Phenolic acids	Phenolic acids	-	A	45100	28500	39000	8850	9070	12700	27200	20700	30100	12200	9840	16300	89600	70500	79300	54800	30700	27000	120000	123000	94600	38100	29900	51200	50600	40600	47200	--	--
Lmlp006927	593.28	533.25	592.269	C35H36N4O5	[M+H]+	2-[4-(2-{[3-(2-Amino-2-oxoethyl)-5-methoxy-2-methyl-1H-indol-1-yl]methyl } phenoxy)butoxy]-N-(pyridin-3-yl)benzamide	Alkaloids	Alkaloids	-	B	265000	166000	117000	23600	458000	372000	84300	107000	140000	113000	278000	148000	101000	99300	272000	77500	74400	62100	48000	66700	72000	90900	34700	79900	234000	200000	200000	--	--
pmb2586	593.13	285.6	594.137	C30H26O13	[M-H]-	Gallocatechin-catechin	Flavonoids	Flavanols	-	B	89200	93100	61300	64600	47800	67500	74300	58700	74100	67200	79900	75500	51300	50600	46200	39400	36500	48200	48200	42100	41000	54600	54600	44000	73900	79200	59700	--	--
Lmnp202682	595.17	463.13	594.158	C27H30O15	[M+H]+	5,7,4'-Trihydroxy-8-methoxyflavone-6-C-[β-D-Xylosyl-(1-2)]-β-D-glucoside	Flavonoids	Flavonoid carbonoside	-	A	16800000	18800000	14100000	19200000	15600000	18000000	15900000	17200000	17500000	19300000	17900000	15400000	7500000	8100000	6530000	7230000	6650000	7220000	9650000	8820000	8580000	7410000	8090000	7900000	15500000	14800000	13400000	--	--
pmn001713	593.15	473.11	594.158	C27H30O15	[M-H]-	Luteolin-7-O-rutinoside	Flavonoids	Flavonoid	3563-98-2	A	423000	357000	378000	412000	423000	408000	289000	367000	383000	403000	428000	275000	928000	1150000	975000	959000	1110000	847000	1170000	1000000	1220000	1090000	1060000	1020000	692000	642000	810000	--	--
pmb0653	595.17	415.1	594.158	C27H30O15	[M+H]+	Apigenin-Di-C,C-hexoside	Flavonoids	Flavonoid	-	A	14200000	7900000	18000000	8580000	8010000	6740000	10500000	7300000	8250000	7780000	7610000	6790000	17800000	18400000	13800000	15800000	16700000	16300000	18400000	17700000	18000000	17200000	18700000	16100000	15000000	14600000	13000000	--	--
pmp001106	595.17	577.16	594.158	C27H30O15	[M+H]+	Vitexin-2-O-D-glucopyranoside	Flavonoids	Flavonoid carbonoside	-	A	281000	256000	224000	298000	257000	255000	256000	260000	312000	269000	224000	240000	597000	721000	500000	550000	624000	596000	677000	685000	708000	707000	637000	631000	425000	458000	452000	--	--
Lmnp002413	595.17	449.11	594.159	C27H30O15	[M+H]+	Tetrahydroxyflavone-C-rhamnosyl-glucoside	Flavonoids	Flavonoid carbonoside	-	A	1610000	1960000	1480000	1820000	1270000	1410000	1680000	1840000	1750000	1700000	1660000	1580000	745000	705000	493000	573000	573000	634000	730000	669000	727000	608000	680000	647000	1430000	1260000	1120000	--	--
pmb3002	607.17	299	608.174	C28H32O15	[M-H]-	Chrysoeriol-7-O-rutinoside	Flavonoids	Flavonoid	-	B	1180000	1380000	1530000	898000	785000	853000	1300000	838000	928000	1070000	917000	922000	1330000	1430000	1300000	1120000	1010000	868000	1510000	1470000	1420000	906000	1020000	984000	1390000	1010000	1250000	--	--
mws1661	609.18	301	608.174	C28H32O15	[M+H]+	Diosmin	Flavonoids	Flavonoid	520-27-4	A	2570000	2650000	2610000	1780000	1760000	1640000	2240000	2010000	1900000	2640000	2190000	2140000	1830000	2300000	1950000	2030000	1840000	1640000	2980000	2370000	2550000	2320000	2060000	2050000	2750000	2390000	2390000	C10039	--
pmp000594	609.18	463.12	608.174	C28H32O15	[M+H]+	Diosmetin-7-O-rutin	Flavonoids	Flavonoid	-	A	1100000	1750000	1160000	884000	1200000	783000	1220000	924000	775000	1470000	1260000	896000	939000	1390000	1180000	1220000	1040000	1120000	1470000	1220000	1330000	1190000	1280000	1240000	1440000	1680000	1140000	--	--
pmp001080	609.18	463.12	608.174	C28H32O15	[M+H]+	Neodiosmin (Diosmetin-7-O-Neohesperidoside)	Flavonoids	Flavonoid	38665-01-9	A	1200000	1380000	1590000	909000	824000	1480000	1420000	841000	789000	1390000	1280000	1030000	1130000	1190000	1240000	1030000	1100000	864000	1790000	1240000	1720000	1350000	1320000	1090000	1860000	1250000	1460000	--	--
Lmmp000897	611.14	287.05	610.132	C30H26O14	[M+H]+	Gallocatechin-Gallocatechin	Flavonoids	Flavanols	-	A	892000	1030000	899000	852000	665000	690000	842000	866000	835000	804000	739000	833000	571000	575000	333000	522000	432000	498000	698000	575000	667000	584000	552000	511000	809000	775000	772000	--	--
Hmpp002612	611.15	287.05	610.145	C27H30O16	[M+H]+	Luteolin-7-O-β-D-gentiobioside	Flavonoids	Flavonoid	-	A	453000	665000	650000	219000	194000	241000	584000	508000	501000	446000	428000	430000	940000	711000	424000	450000	448000	567000	1070000	863000	656000	453000	389000	356000	530000	537000	530000	--	--
pmb0622	611.16	431.1	610.153	C27H30O16	[M+H]+	C-Hexosyl-luteolin O-hexoside	Flavonoids	Flavonoid carbonoside	-	A	2080000	2500000	2260000	1800000	913000	1020000	1890000	2060000	2080000	2700000	2620000	2400000	2550000	2010000	205000	1680000	1760000	2220000	3380000	2250000	2460000	2200000	1760000	1750000	2360000	2250000	2000000	--	--
Zmhp002409	611.16	491.12	610.153	C27H30O16	[M+H]+	Isoluteolin-6,8-di-C-glucoside	Flavonoids	Flavonoid	-	B	956000	1210000	971000	1050000	762000	964000	900000	1020000	906000	1190000	1190000	1290000	823000	844000	260000	922000	770000	993000	935000	958000	961000	1060000	674000	901000	1150000	1180000	1040000	--	--
pmp000126	611.16	593.2	610.153	C27H30O16	[M+H]+	Luteolin-6,8-di-C-glucoside	Flavonoids	Flavonoid	29428-58-8	B	4360000	4890000	4170000	4480000	3330000	4200000	4460000	4710000	4610000	5120000	4240000	4850000	3140000	2810000	1500000	3030000	2750000	3170000	3320000	3210000	3230000	3350000	3280000	3030000	4290000	4220000	3680000	--	--
pmb0624	611.16	431.3	610.153	C27H30O16	[M+H]+	6-C-Hexosyl-luteolin O-hexoside	Flavonoids	Flavonoid carbonoside	-	A	11100000	12900000	11400000	11700000	8030000	9330000	10900000	12000000	11100000	10100000	10200000	10300000	7740000	7330000	4470000	7190000	5990000	6700000	8400000	8100000	8840000	7500000	7010000	6320000	10600000	10000000	9720000	--	--
pmn001583	609.15	300	610.153	C27H30O16	[M-H]-	Quercetin-3-O-robinobioside	Flavonoids	Flavonols	52525-35-6	A	77000	78200	72800	61900	58000	59300	70100	49400	73800	80400	62400	51300	51100	45700	58600	43400	40800	64300	46900	59300	59700	51600	53700	47500	59600	76100	65400	--	--
Zmhp002574	611.16	431.1	610.153	C27H30O16	[M+H]+	Iso-8-C-hexosyl-luteolin O-hexoside	Flavonoids	Flavonoid carbonoside	-	A	322000	351000	281000	361000	227000	268000	349000	380000	338000	304000	256000	283000	190000	210000	135000	164000	174000	220000	229000	241000	202000	209000	226000	223000	292000	312000	270000	--	--
pmb0665	611.16	465.1	610.153	C27H30O16	[M+H]+	Luteolin-8-C-hexosyl-O-hexoside	Flavonoids	Flavonoid	-	A	3200000	3860000	2570000	4870000	4280000	3920000	3490000	3990000	3920000	3830000	3580000	3680000	1720000	1910000	1390000	2290000	2270000	2270000	2000000	1830000	2090000	1990000	2000000	2190000	3310000	2740000	2720000	--	--
Zmxp003107	611.15	287.06	610.153	C27H30O16	[M+H]+	Luteolin-di-O-glucoside	Flavonoids	Flavonoid	-	B	445000	657000	751000	212000	193000	235000	578000	498000	526000	439000	386000	371000	936000	706000	381000	456000	444000	614000	1110000	828000	734000	456000	387000	370000	514000	492000	467000	--	--
Lmbp002592	611.16	287.05	610.153	C27H30O16	[M+H]+	Kaempferol-3,7-O-diglucoside	Flavonoids	Flavonols	-	A	1910000	1820000	1840000	1900000	1260000	1540000	1960000	2140000	1620000	1720000	1730000	1660000	1310000	1230000	830000	1230000	1040000	1210000	1470000	1250000	1140000	1280000	1250000	1160000	1710000	1620000	1500000	--	--
Li512117	611.16	465.1	610.153	C27H30O16	[M+H]+	Quercetin-3-O-neohesperidoside	Flavonoids	Flavonols	117611-67-3	B	3370000	3470000	2650000	4210000	4060000	3890000	3020000	3960000	3410000	3670000	3180000	3420000	1700000	1870000	1320000	2090000	2130000	2280000	1880000	1850000	1870000	1820000	2060000	2020000	3460000	2930000	2720000	--	--
mws4134	611.14	306.08	612.152	C20H32N6O12S2	[M-H]-	Oxidized Glutathione	Amino acids and derivatives	Amino acids and derivatives	121-24-4	A	154000	64700	67000	338000	413000	371000	53200	54000	54500	225000	221000	208000	401000	126000	383000	406000	396000	327000	105000	140000	118000	305000	308000	470000	212000	239000	237000	--	--
pmb3264	611.1	306.2	612.152	C20H32N6O12S2	[M-H]-	Oxiglutatione	Amino acids and derivatives	Amino acids and derivatives	27025-41-8	B	76100	39200	36800	147000	218000	176000	29700	30000	29300	95900	94200	101000	211000	67200	211000	189000	195000	158000	44600	69800	74500	142000	165000	175000	131000	143000	151000	C00127	ko00480,ko01100
pmb0628	613.18	451.1	612.169	C27H32O16	[M+H]+	Eriodictiol C-hexosyl-O-hexoside	Flavonoids	Dihydroflavone	-	B	1260000	1380000	1300000	1230000	856000	1100000	1230000	1260000	1200000	1230000	916000	1200000	886000	805000	439000	697000	639000	646000	858000	816000	811000	816000	790000	722000	1030000	1090000	969000	--	--
Rfmb26201	621.22	417.16	622.226	C30H38O14	[M-H]-	Syringaresinol-aceGlu	Lignans and Coumarins	Lignans	-	A	256000	155000	123000	1030000	1320000	871000	206000	275000	125000	1980000	1470000	1110000	322000	318000	319000	2300000	1940000	1850000	290000	208000	259000	2100000	2250000	2290000	1330000	1120000	1070000	--	--
Hmjp002999	625.17	317.08	624.162	C28H32O16	[M+H]+	Isorhamnetin-3-O-rutinoside (Narcissin)	Flavonoids	Flavonoid	604-80-8	B	68300	68100	40400	41100	48900	55600	57300	54800	67700	51500	31800	39200	27300	20700	27100	33000	29200	36200	30600	27800	24700	17500	21300	20400	52800	45400	33100	--	--
Zmhp002303	625.18	463.12	624.168	C28H32O16	[M+H]+	Isochrysoeriol O-dihexoside	Flavonoids	Flavonoid	-	A	185000	232000	218000	332000	169000	187000	247000	214000	217000	315000	343000	335000	140000	94400	59700	182000	206000	217000	236000	113000	101000	183000	189000	166000	234000	236000	265000	--	--
Lmnp002584	625.18	463.13	624.169	C28H32O16	[M+H]+	5,7,4'-Trihydroxy-6-methoxyflavone-8-C-[β-D-glucosyl-(1-2)]-β-D-glucoside	Flavonoids	Flavonoid carbonoside	-	A	1040000	1100000	893000	1140000	892000	909000	868000	1050000	1010000	1030000	993000	949000	512000	564000	451000	592000	526000	660000	585000	606000	572000	520000	620000	546000	947000	862000	788000	--	--
pmp000127	625.18	607.2	624.169	C28H32O16	[M+H]+	Chrysoeriol-6,8-di-C-glucoside	Flavonoids	Flavonoid carbonoside	-	B	944000	800000	710000	1680000	1820000	1800000	1030000	786000	846000	1510000	1430000	1440000	529000	528000	441000	1190000	1420000	1220000	598000	456000	589000	971000	1070000	1260000	1210000	881000	1030000	--	--
Hmcp001859	625.17	463.12	624.17	C28H32O16	[M+H]+	Isorhamnetin-O-rutinoside	Flavonoids	Flavonols	-	B	988000	1000000	865000	1190000	844000	995000	962000	1030000	1010000	1050000	962000	952000	576000	543000	443000	584000	493000	561000	633000	545000	621000	589000	557000	616000	934000	895000	825000	--	--
pmp000596	627.16	465.1	626.148	C27H30O17	[M+H]+	Quercetin-3,7-O-β-D-diglucoside	Flavonoids	Flavonols	-	B	3990000	4500000	3500000	5180000	3620000	3980000	4380000	4170000	4290000	4690000	4260000	4040000	2460000	2670000	1890000	2380000	2580000	2640000	2770000	2640000	2670000	2900000	2620000	2810000	3990000	3460000	3120000	--	--
pmb0618	627.19	465.1	626.185	C28H34O16	[M+H]+	8-C-Hexosyl-hesperetin O-hexoside	Flavonoids	Flavonoid carbonoside	-	A	1930000	3360000	2950000	1300000	210000	125000	2700000	1610000	1940000	3010000	2550000	2890000	1490000	1110000	435000	1020000	1000000	1620000	2540000	1280000	1180000	1200000	674000	946000	2040000	1810000	1820000	--	--
Hmgp003086	639.19	331.09	638.184	C29H34O16	[M+H]+	Tricin-O-rutinoside	Flavonoids	Flavonoid	-	B	8570000	7760000	7890000	8030000	7260000	7740000	6950000	6750000	6640000	9000000	8010000	7700000	6510000	7530000	6310000	8930000	8230000	7870000	9090000	8300000	8390000	9330000	8280000	9200000	8710000	8980000	9230000	--	--
Hmcp001578	641.17	479.11	640.163	C28H32O17	[M+H]+	Isorhamnetin-O-Hexoside-O-Hexoside	Flavonoids	Flavonols	-	B	59900	55800	52500	67600	72200	73300	61300	70500	65300	65900	68400	60400	33700	45000	14500	56400	47000	59200	36600	48300	54800	60000	42800	36300	56600	63600	56500	--	--
pmb2653	649.1	145	650.227	C24H42O20	[M-H]-	D(+)-Melezitose O-rhamnoside	Others	Saccharides and Alcohols	-	B	83300	71000	68300	70300	71500	47800	75500	61400	63200	490000	721000	352000	121000	97600	203000	153000	264000	277000	94900	92800	73000	536000	209000	187000	316000	262000	261000	--	--
pmb0578	655.17	207	654.158	C32H30O15	[M+H]+	Luteolin-O-sinapoylhexoside	Flavonoids	Flavonoid	-	A	556000	643000	578000	463000	494000	574000	462000	595000	429000	546000	399000	600000	130000	143000	110000	163000	139000	157000	326000	160000	159000	166000	171000	168000	503000	455000	408000	--	--
pmb0713	655.19	331.2	654.18	C29H34O17	[M+H]+	Tricin 7-O-hexosyl-O-hexoside	Flavonoids	Flavonoid	-	A	91900	91400	103000	89900	133000	72700	104000	100000	79300	57100	68700	75400	244000	231000	84800	250000	318000	240000	174000	200000	223000	205000	195000	207000	145000	131000	134000	--	--
pmb0716	655.19	330.9	654.18	C29H34O17	[M+H]+	Tricin di-O-hexoside	Flavonoids	Flavonoid	-	A	229000	248000	207000	268000	209000	231000	211000	192000	168000	387000	296000	304000	263000	279000	160000	375000	390000	447000	296000	287000	305000	484000	393000	408000	308000	292000	287000	--	--
pmb0719	659.2	331.1	658.19	C32H34O15	[M+H]+	Tricin 4'-O-(syringyl alcohol)ether 5-O-hexoside	Flavonoids	Flavonoid	-	A	672000	841000	449000	635000	883000	828000	709000	803000	592000	650000	528000	586000	651000	803000	229000	788000	722000	677000	848000	771000	739000	668000	581000	646000	718000	752000	702000	--	--
pmb0530	664.12	136.2	663.109	C21H27N7O14P2	[M+H]+	Nicotinic acid adenine dinucleotide	Nucleotides and derivatives	Nucleotides and derivatives	53-84-9	B	223000	537000	494000	1210000	558000	767000	456000	442000	445000	1040000	798000	770000	167000	596000	77300	1030000	896000	977000	742000	593000	670000	793000	825000	966000	761000	665000	634000	C00003	ko00190,ko00730,ko00760,ko01100
mws4163	665.21	485.3	666.222	C24H42O21	[M-H]-	1,1-Kestotetraose	Others	Saccharides and Alcohols	13133-07-8	A	1780000	3010000	3010000	22800	8810	14900	2600000	1370000	2230000	331000	647000	364000	1060000	1290000	846000	73900	119000	198000	2260000	1070000	573000	242000	36900	22800	851000	937000	1040000	--	--
pmb0579	669.18	207	668.174	C33H32O15	[M+H]+	Chrysoeriol-O-sinapoylhexoside	Flavonoids	Flavonoid	-	A	251000	238000	170000	363000	325000	374000	225000	244000	229000	306000	252000	270000	27700	32100	27500	52400	45900	71400	70100	32100	43700	52000	60400	58500	185000	182000	171000	--	--
pmb0475	671.18	509	670.174	C29H34O18	[M+H]+	Gallic acid O-feruloyl-O-hexosyl-O-hexoside	Tannins	Tannin	-	A	3420000	3690000	2910000	2750000	3060000	3230000	3460000	3200000	3250000	2010000	1590000	1780000	3940000	4140000	2760000	3950000	3950000	3770000	4660000	4070000	4470000	3220000	3120000	3530000	3660000	3660000	3160000	--	--
pmp001275	672.42	331.29	671.409	C31H61O14N	[M+H]+	3-Hydroxypropyl palmitate glc-glucosamine	Alkaloids	Alkaloids	-	A	674000	610000	640000	253000	438000	302000	577000	726000	757000	387000	520000	833000	799000	654000	966000	500000	317000	334000	791000	740000	632000	243000	267000	201000	681000	552000	576000	--	--
pmp001276	677.37	677.37	676.367	C33H56O14	[M+H]+	2,3-Dihydroxypropyl-9,12,15-octadecatrienoate-hexose-hexose	Lipids	Free fatty acids	-	A	723000	637000	660000	246000	468000	336000	753000	749000	757000	566000	641000	1070000	864000	720000	923000	649000	566000	470000	851000	853000	704000	404000	311000	282000	788000	684000	692000	--	--
pmn001370	681.24	519.19	682.247	C32H42O16	[M-H]-	Pinoresinol diglucoside	Lignans and Coumarins	Lignans	63902-38-5	A	363000	299000	336000	157000	196000	218000	293000	273000	288000	165000	134000	139000	374000	434000	372000	259000	262000	247000	474000	387000	533000	235000	166000	187000	277000	269000	306000	--	--
pmb1312	689.21	331.2	688.2	C33H36O16	[M+H]+	Tricin 4'-O-(β-guaiacylglyceryl)ether 7-O-glucoside	Flavonoids	Flavonoid	-	A	18100000	19800000	16900000	10300000	17200000	15100000	15600000	16900000	13900000	11200000	9530000	10500000	27200000	26600000	10100000	23800000	25800000	24400000	30200000	26300000	29500000	21100000	18600000	22400000	19600000	19600000	20200000	--	--
pmb0738	699.19	331.1	698.185	C34H34O16	[M+H]+	Tricin 7-O-[sinapoyl]-glucoside	Flavonoids	Flavonoid	-	A	47400	29800	24500	19700	83000	66400	20600	28700	28200	44800	50400	32300	30000	31200	48200	55300	38400	31900	44300	30300	45300	69300	38400	53400	62700	55700	60200	--	--
Hmyp007396	702.46	184.07	701.46	C37H68NO9P	[M+H]+	PC(oxo-11:0/18:2)	Lipids	PC	-	A	127000	331000	307000	289000	220000	320000	322000	431000	369000	186000	151000	139000	21500	336000	69000	156000	199000	185000	355000	321000	402000	163000	236000	203000	203000	262000	214000	--	--
Zmhp003322	741.2	433.11	740.195	C36H36O17	[M+H]+	Isovitexin 2''-O-(6'''-(E)-p-coumaroyl)glucoside	Flavonoids	Flavonoid	-	B	353000	114000	778000	112000	88100	91300	233000	106000	119000	120000	87000	96900	531000	598000	412000	491000	555000	448000	812000	623000	674000	564000	479000	465000	365000	347000	394000	--	--
Hmmp001174	741.22	579.16	740.209	C33H41O19	[M+H]+	Pelargonin-O-Hexoside-O-rhamnoside-O-Hexoside	Flavonoids	Anthocyanins	-	B	32700	19000	16200	15600	14000	13600	25700	28400	21700	9190	11500	8650	8330	10700	9	14400	13200	21800	9610	14900	10900	14400	15000	9050	21600	14500	15000	--	--
pmb2991	739.21	269.2	740.216	C33H40O19	[M-H]-	Apigenin O-hexosyl-O-rutinoside	Flavonoids	Flavonoid	-	B	114000	76800	146000	62600	101000	84300	120000	86600	71000	80600	69600	85300	167000	150000	133000	176000	144000	163000	212000	144000	185000	172000	143000	163000	132000	153000	108000	--	--
pme2651	742.1	620.1	743.075	C21H28N7O17P3	[M-H]-	NADP (Nicotinamide adenine dinucleotide phosphate)	Nucleotides and derivatives	Nucleotides and derivatives	53-59-8	B	43100	35300	77300	108000	60600	35800	102000	105000	95800	57300	79400	96200	32300	59500	8630	94200	66200	101000	69100	82300	101000	86000	77700	117000	64700	78800	74100	C00006	ko00195,ko00480,ko00760,ko01100
pmb0660	757.2	147.1	756.19	C36H36O18	[M+H]+	C-Hexosyl-luteolin O-p-coumaroylhexoside	Flavonoids	Flavonoid carbonoside	-	B	382000	376000	358000	266000	170000	343000	333000	386000	405000	421000	245000	416000	322000	314000	201000	330000	298000	261000	494000	333000	306000	387000	342000	281000	351000	351000	328000	--	--
Hmcp001757	757.22	449.1	756.211	C33H40O20	[M+H]+	Quercetin-O-rhamnoside-O-Hexoside-O-rhamnoside	Flavonoids	Flavonols	-	B	448000	571000	497000	420000	271000	482000	429000	553000	663000	535000	340000	562000	532000	447000	244000	481000	415000	373000	720000	543000	426000	539000	511000	418000	557000	557000	523000	--	--
pmp001105	757.22	739.21	756.211	C33H40O20	[M+H]+	Kaempferol-3-O-neohesperidoside-7-glucoside	Flavonoids	Flavonols	-	B	339000	306000	425000	239000	143000	149000	263000	245000	229000	238000	225000	215000	291000	229000	97100	161000	175000	203000	296000	230000	235000	229000	195000	173000	290000	272000	224000	--	--
pmb0691	757.22	431.4	756.211	C33H40O20	[M+H]+	Luteolin-C-hexosyl-O-rhamnoside O-hexoside	Flavonoids	Flavonoid	-	B	3080000	3820000	3340000	3670000	2160000	2410000	2700000	3380000	2780000	3310000	3260000	3310000	1220000	1260000	619000	1010000	1060000	1100000	1530000	1120000	1250000	1130000	1080000	1070000	2540000	2410000	2330000	--	--
pmb0613	757.22	577.2	756.211	C33H40O20	[M+H]+	Apigenin 6-C-hexosyl-8-C-hexosyl-O-hexoside	Flavonoids	Flavonoid	-	A	365000	223000	502000	235000	157000	152000	358000	216000	179000	212000	178000	175000	417000	325000	151000	276000	304000	382000	570000	326000	360000	381000	287000	227000	350000	296000	298000	--	--
pmb0639	757.22	595.2	756.211	C33H40O20	[M+H]+	8-C-Hexosyl-apigenin O-hexosyl-O-hexoside	Flavonoids	Flavonoid carbonoside	-	B	9200000	5800000	14300000	5080000	2620000	3210000	7860000	4890000	5270000	4420000	3740000	3340000	8640000	7650000	4440000	5430000	6540000	7660000	12300000	7900000	9280000	6600000	6000000	5180000	7220000	7580000	7060000	--	--
Zmhp003186	771.21	147.04	770.205	C37H38O18	[M+H]+	Isovitexin 2''-O-(6'''-(E)-feruloyl)glucoside	Flavonoids	Flavonoid	-	A	122000	140000	124000	148000	82700	116000	109000	174000	118000	128000	88100	131000	135000	135000	95800	130000	120000	98300	189000	150000	137000	133000	134000	144000	161000	127000	121000	--	--
pmb0678	771.21	177.1	770.206	C37H38O18	[M+H]+	8-C-Hexosyl-apigenin O-feruloylhexoside	Flavonoids	Flavonoid carbonoside	-	B	538000	11300	2710000	1970000	635000	12700	176000	1240000	1080000	9	9	9	6570000	8580000	8280000	9540000	9880000	9480000	9060000	9000000	10400000	11600000	10600000	11900000	6120000	6400000	5790000	--	--
pmb0592	771.23	463.2	770.227	C34H42O20	[M+H]+	Chrysoeriol-O-hexosyl-O-rutinoside	Flavonoids	Flavonoid	-	B	37500	30200	26600	39000	41400	25300	41200	37800	35100	42100	25300	27000	82000	74200	57400	118000	77200	92900	69500	61700	78600	68400	76300	69200	49400	45900	45200	--	--
pmb1108	773.21	593	772.206	C33H40O21	[M+H]+	Luteolin-6-C-hexoside 8-C-hexosyl-O-hexoside	Flavonoids	Flavonoid	-	A	466000	634000	564000	224000	81500	98600	351000	370000	339000	449000	390000	371000	547000	486000	89700	244000	289000	364000	755000	535000	557000	392000	277000	311000	469000	412000	402000	--	--
GQ512001	771.2	609.1	772.206	C33H40O21	[M-H]-	Quercetin-O-rutinoside-hexose	Flavonoids	Flavonols	-	B	468000	806000	607000	362000	139000	149000	461000	484000	455000	625000	642000	553000	699000	700000	131000	377000	454000	699000	1240000	742000	614000	719000	384000	513000	522000	612000	571000	--	--
pmb0619	775.1	612.9	774.1	C33H42O21	[M+H]+	Eriodictiol 6-C-hexoside 8-C-hexoside-O-hexoside	Flavonoids	Flavonoid	-	B	190000	219000	214000	112000	67300	71900	142000	170000	191000	145000	111000	147000	250000	207000	71400	140000	114000	164000	316000	265000	187000	175000	142000	156000	206000	186000	190000	--	--
Hmgp003540	775.21	527.15	774.2	C36H38O19	[M+H]+	Tricin-O-Malonyl-O-guaiacylglycerol-O-Hexoside	Flavonoids	Flavonoid	-	A	2150000	2130000	2160000	2580000	3000000	2610000	1980000	2010000	2130000	1600000	1440000	1460000	2330000	2640000	2300000	2560000	2660000	2530000	2680000	2570000	2710000	2340000	2220000	2540000	2680000	2570000	2350000	--	--
Hmyp007589	784.47	643.46	783.466	C41H70NO11P	[M+H]+	PE(18:3/18:3+O3)	Lipids	Glycerol ester	-	A	14400	30700	23400	47700	45700	50700	30700	27700	26000	37700	27300	28300	9	10500	2610	19200	22900	14900	11700	10600	18000	30800	33100	34300	31500	24000	20500	--	--
pmb0662	787.21	463.1	786.201	C37H38O19	[M+H]+	C-Hexosyl-luteolin O-feruloylhexoside	Flavonoids	Flavonoid carbonoside	-	A	2150000	2870000	2290000	1880000	1120000	1930000	2090000	2890000	2740000	2240000	2080000	2410000	2680000	2610000	1370000	2230000	1930000	2430000	3510000	2440000	2390000	2430000	2070000	2730000	2510000	2440000	2400000	--	--
pmb0620	787.23	625.1	786.222	C34H42O21	[M+H]+	Chrysoeriol-6-C-hexoside 8-C-hexoside-O-hexoside	Flavonoids	Flavonoid	-	B	296000	356000	283000	247000	157000	174000	313000	285000	253000	347000	274000	322000	254000	180000	86200	247000	241000	322000	279000	207000	230000	255000	205000	224000	364000	284000	283000	--	--
pmb2997	799.19	461.1	800.201	C34H40O22	[M-H]-	Chrysoeriol-O-hexosyl-O-hexosyl-O-Glucuronic acid	Flavonoids	Flavonoid	-	A	28400	36800	21300	24000	16500	19500	22100	18400	20900	31400	17500	34600	18800	27700	26200	24200	22000	21600	26700	16700	28800	37100	25300	24400	25800	26700	29700	--	--
pmb0666	801.22	639.1	800.216	C38H40O19	[M+H]+	6-C-Hexosyl-apigenin O-sinapoylhexoside	Flavonoids	Flavonoid carbonoside	-	B	49300	68700	66800	44900	70200	61700	56300	63300	66500	64100	45700	54800	175000	167000	135000	203000	158000	168000	157000	187000	201000	131000	156000	179000	100000	103000	103000	--	--
pmb0677	831.23	207.1	830.227	C39H42O20	[M+H]+	C-Hexosyl-chrysoeriol O-sinapoylhexoside	Flavonoids	Flavonoid carbonoside	-	B	16100	18900	20400	42200	20100	23000	13100	18700	8210	44000	35900	26700	15100	15700	7570	62000	44000	67600	12300	15100	12400	55300	64300	76400	44800	34100	26400	--	--
Hmmp002008	949.25	787.2	948.247	C40H52O26	[M+H]+	Isorhamnetin-O-Hexoside-O-rhamnoside-O-Hexoside-O-Hexoside	Flavonoids	Flavonols	-	B	38000	56500	69600	21700	10100	17500	41400	33800	39100	28500	21200	23800	41200	52700	29800	42900	31700	33000	60100	49000	56600	35200	52200	43600	45800	40600	29000	--	--
CWJP002348	949.26	787.21	948.254	C43H48O24	[M+H]+	Kaempferol-3-O-rhamnosyl-sophoroside-7-O-glucoside	Flavonoids	Flavonols	-	B	41000	69100	59900	16500	13800	16500	41200	43100	38800	25100	38400	26300	39000	55400	31100	37700	35000	36900	58000	42000	64200	38300	37500	33400	60800	45400	41200	--	--
