# Supplementary material for: Transcriptomic and Metabolomic Analyses of the Effects of Exogenous Trehalose on Heat Tolerance in Wheat
Source: Int J Mol Sci. 2022 May 6;23(9):5194. doi: 10.3390/ijms23095194 (PMC9103215; doi:10.3390/ijms23095194)
Supplement: Supplementary file 1 [file ijms-23-05194-s001.zip › Table S2 Primer List.pdf]

**Supplementary Table S2. Primer List**

| Gene              | Sequence (5' to 3')    |   |
|-------------------|------------------------|---|
| <i>Ubiquitin*</i> | AGATCCAGGACAAGGAGGGT   | F |
|                   | GGAGCACCAAGTGGAGAGTAG  | R |
| <i>RAV</i>        | CTTCCCTCTTGGCGGCGACTC  | F |
|                   | GCACGTAGCTCTGGCTGCTCG  | R |
| <i>NPR1</i>       | TCGAGCAGCTCGCCTTGCTGG  | F |
|                   | CGTGCGACGAGGTGGGAGCAG  | R |
| <i>USP36_42</i>   | TCGTCGTTCCGCCGCCCATACC | F |
|                   | GAGGCCGAGCAGTCCACCGAG  | R |
| <i>COX17</i>      | CGGCTGCTTGCTCCATTGTGA  | F |
|                   | CACTTGGTGCACGCAGACTCC  | R |
| <i>BAG1</i>       | AGCGGGGAGATCGAGTGGGAG  | F |
|                   | GTGGCCACCTGACCGTGATG   | R |
| <i>OPR</i>        | AGATCCACGGCGCACACGGTT  | F |
|                   | GCGGCACCAGTTCTCGAGGCT  | R |
| <i>NRT</i>        | CTCCTTCGGCAACCCACACAT  | F |

|              |                        |   |
|--------------|------------------------|---|
| <i>SPOP</i>  | CCATAACGTGGGCCAAGGAGG  | R |
|              | GCGGAGGTCGCCGACTACGTG  | F |
|              | CCGGCGAGGCGGATGTCGTAC  | R |
| <i>PEP4</i>  | GTACTCCGGCGTCATGGGGTGG | F |
|              | GCACTGCACCCAGGACACGTC  | R |
| <i>ILKAP</i> | GTCACCGCGCTTTCGTACTAC  | F |
|              | ACAGGCCTCCAATCAGCAGTA  | R |

---

\* Indicates an internal reference gene.
