# Supplementary material for: Transcriptomic and Metabolomic Analyses of the Effects of Exogenous Trehalose on Heat Tolerance in Wheat
Source: Int J Mol Sci. 2022 May 6;23(9):5194. doi: 10.3390/ijms23095194 (PMC9103215; doi:10.3390/ijms23095194)
Supplement: Supplementary file 1 [file ijms-23-05194-s001.zip › Table S3 Transcriptome sequencing quality of Triticum aestivum L.pdf]

**Supplementary Table S3. Transcriptome sequencing quality of *Triticum aestivum* L.**

| Sample     | Raw Reads | Clean Reads | Q30(%) | GC Content (%) | Reads mapped     | Unique mapped    |
|------------|-----------|-------------|--------|----------------|------------------|------------------|
| T_II_Tre1  | 67353224  | 65255790    | 94.7   | 54.95          | 61824259(94.74%) | 58598739(89.80%) |
| T_II_Tre2  | 76419692  | 75363154    | 94.76  | 55.8           | 71648824(95.07%) | 67695514(89.83%) |
| T_II_Tre3  | 66532924  | 65073006    | 94.57  | 56.42          | 61882020(95.10%) | 58396707(89.74%) |
| T_I_Tre1   | 54755446  | 53373362    | 94.93  | 55.22          | 51021787(95.59%) | 48136382(90.19%) |
| T_I_Tre2   | 59245142  | 57929558    | 94.54  | 56.2           | 55479187(95.77%) | 52327362(90.33%) |
| T_I_Tre3   | 62356842  | 60982284    | 94.75  | 55.51          | 58229262(95.49%) | 55127443(90.40%) |
| T_II_TreH1 | 57709886  | 56601568    | 94.57  | 54.96          | 53734103(94.93%) | 50916721(89.96%) |
| T_II_TreH2 | 66641204  | 65623710    | 94.53  | 54.17          | 62192086(94.77%) | 59010637(89.92%) |
| T_II_TreH3 | 64983130  | 63295888    | 94.67  | 56.07          | 60027522(94.84%) | 56757384(89.67%) |
| T_I_TreH1  | 58898388  | 57872988    | 94.68  | 54.37          | 55438879(95.79%) | 52706715(91.07%) |
| T_I_TreH2  | 62638158  | 61514930    | 95.76  | 54.79          | 58875181(95.71%) | 55845617(90.78%) |
| T_I_TreH3  | 65849702  | 64591712    | 95.67  | 54.39          | 61840877(95.74%) | 58591997(90.71%) |
| T_II_CK1   | 56663836  | 55216592    | 94.45  | 52.87          | 51831111(93.87%) | 49524806(89.69%) |
| T_II_CK2   | 63559602  | 61972300    | 94.45  | 55.02          | 58692986(94.71%) | 55578732(89.68%) |

|          |          |          |       |       |                  |                  |
|----------|----------|----------|-------|-------|------------------|------------------|
| T_II_CK3 | 52628036 | 51628352 | 94.76 | 54.32 | 48895520(94.71%) | 46441036(89.95%) |
| T_I_CK1  | 55040632 | 53692606 | 94.64 | 52.52 | 50728763(94.48%) | 48385437(90.12%) |
| T_I_CK2  | 68037142 | 66297176 | 94.32 | 55.37 | 63017745(95.05%) | 59626519(89.94%) |
| T_I_CK3  | 47585656 | 46545960 | 94.85 | 55.38 | 44496518(95.60%) | 41991891(90.22%) |
| T_II_H1  | 63434022 | 61899504 | 94.66 | 54.51 | 58507902(94.52%) | 55404773(89.51%) |
| T_II_H2  | 73452672 | 72428548 | 94.41 | 54.96 | 68370658(94.40%) | 64886034(89.59%) |
| T_II_H3  | 67362280 | 65785344 | 94.26 | 55.25 | 62022944(94.28%) | 58830916(89.43%) |
| T_I_H1   | 53090664 | 51756132 | 94.67 | 55.84 | 48943436(94.57%) | 46413948(89.68%) |
| T_I_H2   | 61661246 | 60504818 | 94.26 | 57.3  | 56382302(93.19%) | 53241761(88.00%) |
| T_I_H3   | 61787236 | 60835646 | 94.67 | 55.63 | 57473624(94.47%) | 54431932(89.47%) |

---

T: the transcriptome; 1, 2, 3: repeating groups; I : Yangmai 18; II : Yannong 19; CK: control group; H: heat stress treatment for 24 h; Tre: trehalose pretreatment for 3 d; TreH: trehalose pretreatment for 3 d followed by high-temperature treatment for 24 h.
